# Supplementary material for: Serum proteomic analysis of differentially expressed proteins and pathways involved in the mechanism of endemic osteoarthritis
Source: Royal Society of Chemistry journal article supplement (doi:10.1039/d2mo00154c), 2022-06-29
Supplement: d2mo00154c1.pdf [file d2mo00154c1.pdf]

**Table S1 Characteristics of healthy control, patients from KBD used for LC-MS/MS analysis and PRM analysis**

| Sample          | Age | Gender | BMI  | Grade |
|-----------------|-----|--------|------|-------|
| <b>LC-MS/MS</b> |     |        |      |       |
| Normal 1        | 54  | Female | 22.8 | -     |
| Normal 2        | 52  | Female | 21.7 | -     |
| Normal 3        | 57  | Male   | 20.4 | -     |
| Normal 4        | 51  | Male   | 21.4 | -     |
| KBD 1           | 60  | Female | 19.8 | III*  |
| KBD 2           | 54  | Female | 25.8 | III*  |
| KBD 3           | 60  | Male   | 23.2 | II*   |
| KBD 4           | 53  | Male   | 21.3 | III*  |
| <b>PRM</b>      |     |        |      |       |
| Normal 1        | 47  | Male   | 20.4 | -     |
| Normal 2        | 55  | Male   | 22.7 | -     |
| Normal 3        | 71  | Female | 25.1 | -     |
| Normal 4        | 76  | Male   | 24.6 | -     |
| Normal 5        | 78  | Male   | 22.7 | -     |
| Normal 6        | 44  | Male   | 19.1 | -     |
| Normal 7        | 50  | Female | 22.4 | -     |
| Normal 8        | 49  | Male   | 18.8 | -     |
| KBD 1           | 65  | Male   | 21.6 | II*   |
| KBD 2           | 73  | Female | 19.5 | II*   |
| KBD 3           | 66  | Male   | 22.5 | III*  |
| KBD 4           | 76  | Female | 24.6 | III*  |
| KBD 5           | 66  | Male   | 23.8 | II*   |
| KBD 6           | 54  | Male   | 24.8 | III*  |
| KBD 7           | 49  | Male   | 19.6 | II*   |
| KBD 8           | 55  | Female | 21.2 | III*  |
| KBD 9           | 77  | Male   | 26.4 | III*  |
| KBD 10          | 52  | Female | 23.4 | III*  |
| <b>IHC</b>      |     |        |      |       |
| Normal 1        | 46  | Male   | 22.5 | -     |
| Normal 2        | 58  | Female | 21.4 | -     |
| Normal 3        | 49  | Male   | 18.4 | -     |
| KBD 1           | 75  | Male   | 25.8 | III*  |
| KBD 2           | 71  | Female | 23.8 | III*  |
| KBD 3           | 58  | Male   | 21.2 | III*  |

\* grade II patient the national criteria of KBD in China [WS/T 207-2010]

and III KBD according to diagnostic
