# Supplementary material for: Serum proteomic analysis of differentially expressed proteins and pathways involved in the mechanism of endemic osteoarthritis
Source: Royal Society of Chemistry journal article supplement (doi:10.1039/d2mo00154c), 2022-06-29
Supplement: d2mo00154c2.xlsx [file d2mo00154c2.xlsx]

## Sheet: Sheet1
Protein accession	Protein description	Gene name	MW [kDa]	Score	Coverage [%]	Peptides	PSMs	Unique peptides	Ratio	P value
A0A075B6H9	Immunoglobulin lambda variable 4-69	IGLV4-69	12.773	5.95	8.4	1	1	1	1.40419	0.0900693
A0A075B6I0	Immunoglobulin lambda variable 8-61	IGLV8-61	12.814	5.9507	7.4	1	1	1
A0A075B6I1	Immunoglobulin lambda variable 4-60	IGLV4-60	12.987	12.756	8.3	1	1	1	0.848114	0.746502
A0A075B6I9	Ig lambda chain V region 4A	IGLV7-46	12.468	6.9588	7.7	1	1	1
A0A075B6K5	Ig lambda chain V-III region LOI	IGLV3-9	12.332	8.6745	13.9	1	1	1	1.53382	0.0970557
A0A087WSY6	Ig kappa chain V-III region POM	IGKV3-15	12.534	13.497	13	1	1	1
A0A0A0MRZ8	Ig kappa chain V-III region VG	IGKV3-11	12.625	6.7845	7.8	1	2	1
A0A0B4J1U7	Immunoglobulin heavy variable 6-1	IGHV6-1	13.481	6.9408	7.4	1	1	1
A0A0B4J1V6	Immunoglobulin heavy variable 3-73	IGHV3-49	12.858	6.1363	15.1	2	3	1
A0A0B4J1Y9	Immunoglobulin heavy variable 3-72	IGHV3-72	13.203	26.892	26.1	3	5	2	1.04431	0.865494
A0A0C4DH25	Immunoglobulin kappa variable 3D-20	IGKV3D-20	12.515	7.4524	7.8	1	1	1	1.24108	0.519957
A0A0C4DH31	Ig heavy chain V-I region V35	IGHV1-2	12.82	8.6235	9.4	1	1	1	1.29001	0.319352
A0A0C4DH68	Immunoglobulin kappa variable 2-24	IGKV2-24	13.079	8.2762	10.8	1	2	1
A0A0J9YX35	Immunoglobulin heavy variable 3-64D	IGHV3-64D	12.822	16.015	9.4	1	2	1
A0A0J9YXX1	Immunoglobulin heavy variable 5-10-1	IGHV5-51	12.772	6.3775	9.4	1	1	1	1.39041	0.334263
A1L4H1	Soluble scavenger receptor cysteine-rich domain-containing protein SSC5D	SSC5D	165.74	98.672	8.9	9	13	9	1.72063	0.0347896
A2NJV5	Ig kappa chain V-II region RPMI 6410	IGKV A18	13.085	12.527	10.8	1	2	1	1.20351	0.378586
A6NML5	Transmembrane protein 212	TMEM212	21.425	5.9439	4.1	1	2	1
A8MUU1	Putative fatty acid-binding protein 5-like protein 3	FABP5P3	11.299	11.64	20.8	1	1	1
O00116	Alkyldihydroxyacetonephosphate synthase, peroxisomal	AGPS	72.911	17.918	6.8	3	4	3
O00151	PDZ and LIM domain protein 1	PDLIM1	36.071	13.273	7.6	2	2	2
O00159	Unconventional myosin-Ic	MYO1C	121.68	14.534	2.4	2	2	2	0.571732	0.0138628
O00187	Mannan-binding lectin serine protease 2	MASP2	75.702	294.58	28.7	17	28	17	1.46989	0.00117343
O00231	26S proteasome non-ATPase regulatory subunit 11	PSMD11	47.463	5.9177	3.1	1	1	1	0.337199	0.00100793
O00299	Chloride intracellular channel protein 1	CLIC1	26.922	37.563	12.4	2	3	2	0.266764	0.000527301
O00391	Sulfhydryl oxidase 1	QSOX1	82.577	188.5	25.3	16	23	16	1.38076	0.0720273
O00410	Importin-5	IPO5	123.63	27.413	4.6	4	4	4	0.725385	0.0372175
O00451	GDNF family receptor alpha-2	GFRA2	51.543	6.2847	3.7	1	1	1
O00468	Agrin	AGRN	217.23	11.364	1.2	2	2	2	1.76052	0.0252355
O00499	Myc box-dependent-interacting protein 1	BIN1	64.699	6.7929	3.2	1	1	1
O00533	Neural cell adhesion molecule L1-like protein	CHL1	135.07	212.74	20	18	27	18	1.51125	0.0494801
O00567	Nucleolar protein 56	NOP56	66.049	7.8554	2.5	1	1	1	0.603364	0.074801
O00571	ATP-dependent RNA helicase DDX3X	DDX3X	73.243	6.1538	3	2	2	1
O00584	Ribonuclease T2	RNASET2	29.48	11.26	9	2	2	2
O00592	Podocalyxin	PODXL	58.635	16.916	5	3	3	3	1.40368	0.0582855
O00602	Ficolin-1	FCN1	35.078	18.77	9.8	3	4	3
O00767	Acyl-CoA desaturase	SCD	41.522	6.0366	3.6	1	1	1
O14498	Immunoglobulin superfamily containing leucine-rich repeat protein	ISLR	45.997	11.789	4.9	2	2	2
O14745	Na(+)/H(+) exchange regulatory cofactor NHE-RF1	SLC9A3R1	38.868	12.564	7.8	2	2	2	0.261087
O14786	Neuropilin-1	NRP1	103.13	83.547	11.3	9	13	9	1.48304	0.101849
O14791	Apolipoprotein L1	APOL1	43.974	119.7	28.9	13	24	13	1.20764	0.518096
O14818	Proteasome subunit alpha type-7	PSMA7	27.887	28.333	17.3	4	5	4	0.990818	0.900507
O14907	Tax1-binding protein 3	TAX1BP3	13.735	12.205	13.7	1	1	1
O14925	Mitochondrial import inner membrane translocase subunit Tim23	TIMM23	21.943	6.7365	8.1	1	1	1	0.630359	0.113537
O14979	Heterogeneous nuclear ribonucleoprotein D-like	HNRNPDL	46.437	21.658	7.1	3	5	3	0.309493	0.00025014
O14980	Exportin-1	XPO1	123.38	18.519	2.8	3	3	3	0.36359	0.000178121
O15335	Chondroadherin	CHAD	40.475	6.4677	3.6	1	1	1
O15347	High mobility group protein B3	HMGB3	22.98	15.83	13	2	2	2	0.688899	0.0360268
O15355	Protein phosphatase 1G	PPM1G	59.271	20.382	6	3	3	3	0.624531	0.318166
O15372	Eukaryotic translation initiation factor 3 subunit H	EIF3H	39.93	6.2372	2.8	1	1	1	0.394255	0.000450983
O15394	Neural cell adhesion molecule 2	NCAM2	93.045	63.07	9.4	7	7	7	1.42732	0.187695
O43157	Plexin-B1	PLXNB1	232.3	11.388	1.3	2	2	2
O43242	26S proteasome non-ATPase regulatory subunit 3	PSMD3	60.977	22.212	7.7	3	3	3
O43278	Kunitz-type protease inhibitor 1	SPINT1	58.397	13.434	4.3	2	2	2	1.13807	0.341865
O43390	Heterogeneous nuclear ribonucleoprotein R	HNRNPR	70.942	46.095	9.5	7	11	5	0.612988	0.0059086
O43396	Thioredoxin-like protein 1	TXNL1	32.251	12.796	7.6	1	1	1
O43399	Tumor protein D54	TPD52L2	22.237	6.0203	9.2	1	1	1
O43493	Trans-Golgi network integral membrane protein 2	TGOLN2	51.018	25.592	9.4	4	4	4	1.56052	0.0512717
O43505	N-acetyllactosaminide beta-1,3-N-acetylglucosaminyltransferase	B3GNT1	47.119	7.1189	3.9	1	1	1
O43707	Alpha-actinin-4	ACTN4	104.85	135.11	20.4	16	19	12	0.435516	0.000465857
O43795	Unconventional myosin-Ib	MYO1B	131.98	14.981	2.2	2	2	2
O43809	Cleavage and polyadenylation specificity factor subunit 5	NUDT21	26.227	10.82	11	2	2	2
O43852	Calumenin	CALU	37.106	76.833	27	7	8	7	0.799245	0.229838
O43866	CD5 antigen-like	CD5L	38.087	124.3	32.6	11	17	11	0.525197	0.0248712
O43895	Xaa-Pro aminopeptidase 2	XPNPEP2	75.624	6.6489	1.8	1	1	1
O60231	Putative pre-mRNA-splicing factor ATP-dependent RNA helicase DHX16	DHX16	119.26	6.3168	1.5	1	1	1
O60279	Sushi domain-containing protein 5	SUSD5	68.02	6.4117	1.4	1	1	1
O60361	Putative nucleoside diphosphate kinase	NME2P1	15.529	6.7751	19.7	2	2	1	0.238817	2.41653e-05
O60462	Neuropilin-2	NRP2	104.83	33.358	4.8	4	5	4	1.69954	0.0685937
O60488	Long-chain-fatty-acid--CoA ligase 4	ACSL4	79.187	6.1399	2.5	1	1	1	0.791973	0.297558
O60506	Heterogeneous nuclear ribonucleoprotein Q	SYNCRIP	69.602	18.157	6.6	4	6	2	0.331647	3.61604e-05
O60610	Protein diaphanous homolog 1	DIAPH1	141.35	6.336	1	1	1	1
O60664	Perilipin-3	PLIN3	47.074	23.644	11.1	3	3	3	0.560617	0.049413
O60701	UDP-glucose 6-dehydrogenase	UGDH	55.023	13.254	5.9	2	2	2
O60832	H/ACA ribonucleoprotein complex subunit 4	DKC1	57.673	6.2496	2.1	1	4	1	1.15678	0.589023
O60841	Eukaryotic translation initiation factor 5B	EIF5B	138.83	6.3618	1.1	1	1	1	1.25482	0.0711434
O60884	DnaJ homolog subfamily A member 2	DNAJA2	45.745	6.51	3.2	1	1	1
O75023	Leukocyte immunoglobulin-like receptor subfamily B member 5	LILRB5	64.125	21.588	7.5	3	3	3
O75144	ICOS ligand	ICOSLG	33.348	40.466	9.3	2	3	2	1.38847	0.0133849
O75339	Cartilage intermediate layer protein 1	CILP	132.56	6.1155	0.9	1	1	1
O75347	Tubulin-specific chaperone A	TBCA	12.855	6.0897	8.3	1	1	1
O75367	Core histone macro-H2A.1	H2AFY	39.617	21.921	7.8	2	2	2
O75369	Filamin-B	FLNB	278.16	8.2929	1.7	5	5	1
O75381	Peroxisomal membrane protein PEX14	PEX14	41.236	6.7818	3.2	1	1	1
O75390	Citrate synthase, mitochondrial	CS	51.712	38.246	11.8	5	5	5
O75521	Enoyl-CoA delta isomerase 2, mitochondrial	ECI2	43.585	16.452	3.8	1	1	1
O75531	Barrier-to-autointegration factor	BANF1	10.058	12.085	24.7	2	2	2	0.245922	5.51212e-05
O75533	Splicing factor 3B subunit 1	SF3B1	145.83	16.505	2.1	2	2	2	0.737211	0.173121
O75636	Ficolin-3	FCN3	32.903	113.28	26.4	8	19	8	1.43538	0.0607312
O75643	U5 small nuclear ribonucleoprotein 200 kDa helicase	SNRNP200	244.5	44.339	3.6	7	8	7
O75694	Nuclear pore complex protein Nup155	NUP155	155.2	9.6076	1.2	1	1	1	0.819895	0.227893
O75821	Eukaryotic translation initiation factor 3 subunit G	EIF3G	35.611	6.1538	2.8	1	1	1
O75822	Eukaryotic translation initiation factor 3 subunit J	EIF3J	29.062	16.969	8.5	2	2	2
O75874	Isocitrate dehydrogenase [NADP] cytoplasmic	IDH1	46.659	21.392	7	3	3	3	1.56835	0.00211833
O75882	Attractin	ATRN	158.54	323.31	26.9	32	80	32	1.56573	0.000526324
O75937	DnaJ homolog subfamily C member 8	DNAJC8	29.841	5.9673	3.2	1	1	1
O76021	Ribosomal L1 domain-containing protein 1	RSL1D1	54.972	26.051	9.4	4	4	4	0.322679	0.000830144
O76031	ATP-dependent Clp protease ATP-binding subunit clpX-like, mitochondrial	CLPX	69.223	5.9771	2.1	1	1	1
O76061	Stanniocalcin-2	STC2	33.248	7.6786	4	1	1	1
O76094	Signal recognition particle subunit SRP72	SRP72	74.605	6.6759	1.3	1	1	1
O94769	Extracellular matrix protein 2	ECM2	79.788	17.804	3.1	2	2	2	1.39295	0.0190062
O94776	Metastasis-associated protein MTA2	MTA2	75.022	12.654	3.9	2	2	2
O94826	Mitochondrial import receptor subunit TOM70	TOMM70A	67.454	11.748	3.3	2	2	2	0.198654	0.000472886
O94885	SAM and SH3 domain-containing protein 1	SASH1	136.65	6.6209	0.8	1	4	1	1.54381	0.0266566
O94985	Calsyntenin-1	CLSTN1	109.79	25.257	4.3	4	5	4	1.32627	0.0435275
O95232	Luc7-like protein 3	LUC7L3	51.466	13.212	3.2	1	1	1
O95274	Ly6/PLAUR domain-containing protein 3	LYPD3	35.97	6.6059	5.5	1	1	1
O95347	Structural maintenance of chromosomes protein 2	SMC2	135.65	7.2841	0.9	1	1	1	0.702033	0.0631187
O95428	Papilin	PAPLN	137.7	17.772	2	2	2	2
O95433	Activator of 90 kDa heat shock protein ATPase homolog 1	AHSA1	38.274	7.6683	3.6	1	1	1
O95445	Apolipoprotein M	APOM	21.253	90.466	23.9	3	5	3	1.08914	0.547171
O95479	GDH/6PGL endoplasmic bifunctional protein	H6PD	88.892	67.056	10	7	8	7	1.58768	0.0147933
O95497	Pantetheinase	VNN1	57.011	46.648	11.1	5	6	5	1.43794	0.497977
O95816	BAG family molecular chaperone regulator 2	BAG2	23.772	12.742	8.1	2	2	2	0.283311	0.000510858
O95831	Apoptosis-inducing factor 1, mitochondrial	AIFM1	66.9	8.9595	2	1	1	1
O95897	Noelin-2	OLFM2	51.386	7.7666	3.3	1	1	1
O95980	Reversion-inducing cysteine-rich protein with Kazal motifs	RECK	106.46	29.515	4.7	4	5	4	1.55258	0.0530484
O95995	Growth arrest-specific protein 8	GAS8	56.355	5.8937	2.3	1	1	1	1.59373	0.00448286
O95998	Interleukin-18-binding protein	IL18BP	21.099	13.039	8.8	2	2	2
O96008	Mitochondrial import receptor subunit TOM40 homolog	TOMM40	37.893	8.4574	3	1	2	1
P00338	L-lactate dehydrogenase A chain	LDHA	36.688	58.322	21.4	7	13	6	0.560464	0.00289528
P00374	Dihydrofolate reductase	DHFR	21.452	6.6081	8.6	1	1	1
P00387	NADH-cytochrome b5 reductase 3	CYB5R3	34.234	20.526	8.3	2	2	2	0.71608	0.0287779
P00390	Glutathione reductase, mitochondrial	GSR	56.256	44.651	12.5	6	8	6	1.21713	0.137138
P00441	Superoxide dismutase [Cu-Zn]	SOD1	15.936	34.438	23.4	3	5	3	1.3422	0.220979
P00450	Ceruloplasmin	CP	122.2	323.31	38.9	39	281	39	1.78294	0.0201708
P00451	Coagulation factor VIII	F8	267.01	14.186	0.9	2	2	2
P00488	Coagulation factor XIII A chain	F13A1	83.266	134.76	15	9	11	9	1.26128	0.218802
P00491	Purine nucleoside phosphorylase	PNP	32.118	12.911	10	2	2	2
P00492	Hypoxanthine-guanine phosphoribosyltransferase	HPRT1	24.579	8.4664	6	1	2	1	1.18442	0.207134
P00505	Aspartate aminotransferase, mitochondrial	GOT2	47.517	23.445	11.4	4	4	4	1.51925	0.00632783
P00533	Epidermal growth factor receptor	EGFR	134.28	50.371	6.2	8	8	8	1.06398	0.500179
P00558	Phosphoglycerate kinase 1	PGK1	44.614	82.962	22.3	8	10	8	0.62678	0.0539366
P00734	Prothrombin	F2	70.036	323.31	50.5	32	161	32	1.53651	0.00574342
P00736	Complement C1r subcomponent	C1R	80.118	323.31	30.4	23	67	22	1.68676	0.0415421
P00738	Haptoglobin	HP	45.205	323.31	55.7	27	104	11	4.69991	0.142825
P00739	Haptoglobin-related protein	HPR	39.029	25.067	34.2	18	49	2	3.06539	0.132255
P00740	Coagulation factor IX	F9	51.778	180.85	34.1	13	23	13	1.58703	0.00574833
P00742	Coagulation factor X	F10	54.731	187.31	26.4	13	35	13	1.6489	0.00419167
P00746	Complement factor D	CFD	27.033	295.06	49	9	16	9	1.48147	0.0146846
P00747	Plasminogen	PLG	90.568	323.31	59.3	50	187	50	1.71709	0.000303644
P00748	Coagulation factor XII	F12	67.791	217.02	32.7	17	27	17	1.04706	0.879906
P00751	Complement factor B	CFB	85.532	323.31	37.8	35	159	34	1.95535	0.0237845
P00915	Carbonic anhydrase 1	CA1	28.87	225.64	42.1	9	21	9	3.53024	0.134708
P00918	Carbonic anhydrase 2	CA2	29.246	39.909	14.6	4	5	4	3.05032	0.131034
P00966	Argininosuccinate synthase	ASS1	46.53	61.288	17.7	8	10	8	0.342107	0.000213776
P01008	Antithrombin-III	SERPINC1	52.602	323.31	47	24	126	24	1.4995	0.0189689
P01009	Alpha-1-antitrypsin	SERPINA1	46.736	323.31	55.3	23	123	23	1.51811	0.237365
P01011	Alpha-1-antichymotrypsin	SERPINA3	47.65	323.31	35.7	18	111	18	1.71093	0.022019
P01019	Angiotensinogen	AGT	53.154	161.98	22.1	10	31	10	1.64182	0.0257703
P01023	Alpha-2-macroglobulin	A2M	163.29	323.31	36	47	123	35	1.28198	0.185719
P01024	Complement C3	C3	187.15	323.31	53.6	97	771	85	1.72562	0.00968167
P01031	Complement C5	C5	188.3	323.31	28.8	54	153	54	1.67045	0.00278733
P01033	Metalloproteinase inhibitor 1	TIMP1	23.171	26.213	18.8	4	4	4	1.60163	0.0199132
P01034	Cystatin-C	CST3	15.799	160.12	37	5	12	5	1.58312	0.00350599
P01040	Cystatin-A	CSTA	11.006	6.5483	18.4	1	1	1	1.48571	0.0439073
P01042	Kininogen-1	KNG1	71.957	323.31	38.2	33	153	33	1.60028	0.000108981
P01130	Low-density lipoprotein receptor	LDLR	95.375	12.701	2.7	2	2	2	1.69184	0.0147636
P01137	Transforming growth factor beta-1	TGFB1	44.341	15.259	5.4	2	2	2	1.26965	0.301904
P01344	Insulin-like growth factor II	IGF2	20.14	25.358	13.9	2	6	2	1.25288	0.0450742
P01591	Immunoglobulin J chain	IGJ	18.098	23.895	22.6	3	7	3	0.748672	0.0761306
P01705	Ig lambda chain V-II region NEI	IGLV2-23	11.893	5.986	7.1	1	1	1	0.965737	0.905796
P01709	Ig lambda chain V-II region MGC	IGLV2-8	12.382	6.0832	13.6	2	4	1	0.568202	0.135167
P01714	Ig lambda chain V-III region SH	IGLV3-19	12.042	14.691	17	2	2	2	1.43453	0.00233576
P01780	Ig heavy chain V-III region JON	IGHV3-7	12.943	6.3166	17.1	2	6	1	1.01227	0.954505
P01834	Ig kappa chain C region	IGKC	11.765	69.177	65.4	5	13	2	1.20843	0.550742
P01859	Ig gamma-2 chain C region	IGHG2	35.9	115.1	29.8	9	33	4	1.61124	0.145559
P01860	Ig gamma-3 chain C region	IGHG3	41.287	49.737	30.8	9	35	3	2.12362	0.127861
P01861	Ig gamma-4 chain C region	IGHG4	35.94	22.851	26.6	7	16	2	1.78797	0.316162
P01871	Ig mu chain C region	IGHM	49.439	323.31	39.5	16	49	16	0.474982	0.0111668
P01876	Ig alpha-1 chain C region	IGHA1	37.654	224.45	30.3	10	21	6	1.7795	0.0915066
P02042	Hemoglobin subunit delta	HBD	16.055	37.506	62.6	8	10	4	0.948046	0.937064
P02144	Myoglobin	MB	17.184	41.526	24.7	3	3	3	1.36834	0.0119072
P02452	Collagen alpha-1(I) chain	COL1A1	138.94	37.566	4.8	6	7	6	1.96328	0.00272184
P02461	Collagen alpha-1(III) chain	COL3A1	138.56	17.553	2.3	3	3	3	1.55171	0.0122408
P02545	Prelamin-A/C	LMNA	74.139	262.98	37.8	24	35	24	0.357836	0.000882275
P02647	Apolipoprotein A-I	APOA1	30.777	323.31	84.3	31	350	30	1.41903	0.140829
P02649	Apolipoprotein E	APOE	36.154	323.31	58	20	62	20	1.38327	0.274845
P02652	Apolipoprotein A-II	APOA2	11.175	31.099	21	4	19	4	1.38517	0.182592
P02654	Apolipoprotein C-I	APOC1	9.3318	52.415	37.3	6	28	6	1.24236	0.313434
P02655	Apolipoprotein C-II	APOC2	11.284	83.023	28.7	3	20	3	1.28871	0.462222
P02656	Apolipoprotein C-III	APOC3	10.852	323.31	37.4	4	35	4	1.43276	0.230014
P02671	Fibrinogen alpha chain	FGA	94.972	51.777	7.4	5	6	5	1.842	0.377039
P02741	C-reactive protein	CRP	25.038	44.989	22.3	6	14	6	5.87666	0.146494
P02743	Serum amyloid P-component	APCS	25.387	216.46	35.9	9	34	9	2.12938	0.00428513
P02745	Complement C1q subcomponent subunit A	C1QA	26.016	45.404	9	4	11	4	1.61214	0.023206
P02746	Complement C1q subcomponent subunit B	C1QB	26.721	87.794	23.3	6	18	6	1.62594	0.0143885
P02747	Complement C1q subcomponent subunit C	C1QC	25.773	161.38	21.6	4	11	4	1.36832	0.0326394
P02748	Complement component C9	C9	63.173	323.31	32.7	19	53	18	1.81386	0.105042
P02749	Beta-2-glycoprotein 1	APOH	38.298	323.31	47.2	18	115	18	1.62382	0.00252129
P02750	Leucine-rich alpha-2-glycoprotein	LRG1	38.177	120.16	25.4	9	26	9	2.2075	0.002868
P02751	Fibronectin	FN1	262.62	323.31	27.2	54	101	54	1.23858	0.0758583
P02753	Retinol-binding protein 4	RBP4	23.01	71.492	31.8	6	23	6	1.45934	0.00472857
P02760	Protein AMBP	AMBP	38.999	298.72	38.1	12	83	12	1.63326	0.00743295
P02763	Alpha-1-acid glycoprotein 1	ORM1	23.511	126.06	40.8	8	27	6	2.21931	0.156224
P02765	Alpha-2-HS-glycoprotein	AHSG	39.324	248.05	25.9	9	84	7	1.72643	0.00385962
P02766	Transthyretin	TTR	15.887	46.939	9.5	2	44	2	1.66746	0.0156786
P02774	Vitamin D-binding protein	GC	52.963	323.31	56.5	32	213	32	1.66078	0.00081723
P02775	Platelet basic protein	PPBP	13.894	56.188	38.3	5	12	5	1.56716	0.275973
P02776	Platelet factor 4	PF4	10.845	31.139	42.6	4	5	1	1.172	0.740508
P02786	Transferrin receptor protein 1	TFRC	84.87	69.173	13	8	8	8	0.583017	0.0758783
P02787	Serotransferrin	TF	77.063	323.31	58.2	43	140	43	1.06477	0.708277
P02788	Lactotransferrin	LTF	78.181	150.73	30.3	18	21	18	1.25858	0.2632
P02790	Hemopexin	HPX	51.676	323.31	55.4	22	281	22	1.61638	0.00559294
P02810	Salivary acidic proline-rich phosphoprotein 1/2	PRH1	17.016	19.346	25.9	3	3	3	1.49489	0.0447742
P03950	Angiogenin	ANG	16.55	23.877	15.6	3	5	3	1.61994	0.0677124
P03951	Coagulation factor XI	F11	70.108	248.69	34.6	21	42	20	1.55157	0.00617649
P03952	Plasma kallikrein	KLKB1	71.369	323.31	47.5	31	92	30	1.38221	0.00710501
P03973	Antileukoproteinase	SLPI	14.326	12.079	15.9	2	2	2	1.62612	0.00930212
P04003	C4b-binding protein alpha chain	C4BPA	67.033	323.31	43.6	25	144	24	1.47401	0.0269925
P04004	Vitronectin	VTN	54.305	323.31	40.4	19	108	17	1.49635	0.000911935
P04040	Catalase	CAT	59.755	323.31	22.4	11	17	11	2.68468	0.0293408
P04066	Tissue alpha-L-fucosidase	FUCA1	53.688	36.46	11.8	6	6	6	1.54312	0.00794604
P04070	Vitamin K-dependent protein C	PROC	52.071	87.865	16.1	7	12	7	1.30323	0.0213181
P04075	Fructose-bisphosphate aldolase A	ALDOA	39.42	225.69	46.2	15	20	12	0.96035	0.681116
P04080	Cystatin-B	CSTB	11.139	6.5093	12.2	1	1	1
P04083	Annexin A1	ANXA1	38.714	6.2253	4	1	1	1	0.396151	0.0129932
P04114	Apolipoprotein B-100	APOB	515.6	323.31	45.8	207	800	204	1.32378	0.0047009
P04156	Major prion protein	PRNP	27.661	11.219	8.3	2	2	2	1.57192	0.0105599
P04179	Superoxide dismutase [Mn], mitochondrial	SOD2	24.75	6.07	3.6	1	1	1
P04180	Phosphatidylcholine-sterol acyltransferase	LCAT	49.577	119.29	23.2	8	18	8	1.30885	0.0767731
P04196	Histidine-rich glycoprotein	HRG	59.578	323.31	36.2	17	73	17	1.30881	0.218247
P04217	Alpha-1B-glycoprotein	A1BG	54.253	262.35	25.5	11	68	11	1.58904	0.00392683
P04264	Keratin, type II cytoskeletal 1	KRT1	66.038	323.31	43.2	30	5	2	2.72633	0.041344
P04275	von Willebrand factor	VWF	309.26	323.31	31.5	78	113	78	1.39721	0.0580165
P04278	Sex hormone-binding globulin	SHBG	43.779	90.875	26.1	9	17	9	0.877993	0.765343
P04406	Glyceraldehyde-3-phosphate dehydrogenase	GAPDH	36.053	117.22	37.6	10	18	10	0.536472	0.0014572
P04424	Argininosuccinate lyase	ASL	51.657	21.228	7.8	4	4	4	1.26398	0.134744
P04792	Heat shock protein beta-1	HSPB1	22.782	33.855	25.4	5	6	5	0.637005	0.0755815
P04843	Dolichyl-diphosphooligosaccharide--protein glycosyltransferase subunit 1	RPN1	68.569	75.321	14.3	9	10	9	0.272956	0.00221961
P04844	Dolichyl-diphosphooligosaccharide--protein glycosyltransferase subunit 2	RPN2	69.283	13.859	4.1	2	3	2
P04899	Guanine nucleotide-binding protein G(i) subunit alpha-2	GNAI2	40.45	20.609	12.4	3	3	2
P05019	Insulin-like growth factor I	IGF1	21.841	31.94	7.2	2	4	2	1.49305	0.178032
P05023	Sodium/potassium-transporting ATPase subunit alpha-1	ATP1A1	112.89	17.354	3	2	3	2	0.634443	0.144135
P05026	Sodium/potassium-transporting ATPase subunit beta-1	ATP1B1	35.061	12.29	7.3	2	2	2
P05062	Fructose-bisphosphate aldolase B	ALDOB	39.473	121.18	32.1	9	15	8	1.33079	0.235905
P05067	Amyloid beta A4 protein	APP	86.942	84.899	11.3	8	8	7	1.44824	0.225615
P05090	Apolipoprotein D	APOD	21.275	240.49	46.6	8	48	8	1.05312	0.80118
P05106	Integrin beta-3	ITGB3	87.057	28.889	4.7	3	3	3	1.30887	0.20963
P05107	Integrin beta-2	ITGB2	84.781	17.507	3.5	3	3	3	1.61685	0.0174637
P05109	Protein S100-A8	S100A8	10.834	23.018	31.2	3	3	3	2.91458	0.0986618
P05114	Non-histone chromosomal protein HMG-14	HMGN1	10.659	13.494	19	2	2	2	0.368167	0.000263982
P05121	Plasminogen activator inhibitor 1	SERPINE1	45.059	7.1874	2.2	1	1	1
P05141	ADP/ATP translocase 2	SLC25A5	32.852	24.811	10.1	3	6	1	0.767151	0.17296
P05154	Plasma serine protease inhibitor	SERPINA5	45.674	100.97	29.6	11	20	11	1.4416	0.0513189
P05155	Plasma protease C1 inhibitor	SERPING1	55.154	285.55	25.8	14	117	14	1.61026	4.63242e-05
P05156	Complement factor I	CFI	65.75	323.31	37	22	84	22	1.736	0.0167654
P05186	Alkaline phosphatase, tissue-nonspecific isozyme	ALPL	57.304	15.962	4.2	2	3	2	0.693259	0.038202
P05187	Alkaline phosphatase, placental type	ALPP	57.953	89.366	15.3	7	7	7	0.393064	0.000811558
P05362	Intercellular adhesion molecule 1	ICAM1	57.825	121.13	19.2	7	11	7	1.51722	0.0343279
P05387	60S acidic ribosomal protein P2	RPLP2	11.665	63.816	39.1	2	4	2	0.215796	9.19652e-05
P05452	Tetranectin	CLEC3B	22.537	196.74	42.6	7	16	7	1.5202	0.0100367
P05455	Lupus La protein	SSB	46.836	7.8216	2.5	1	1	1	0.378542	0.00664433
P05534	HLA class I histocompatibility antigen, A-24 alpha chain	HLA-A	40.688	51.08	17.8	5	8	2	1.10262	0.801827
P05543	Thyroxine-binding globulin	SERPINA7	46.324	246.39	26.7	11	47	11	1.59352	0.00665905
P05546	Heparin cofactor 2	SERPIND1	57.07	229.21	29.1	15	58	15	1.73385	0.0136905
P05556	Integrin beta-1	ITGB1	88.414	71.705	12.9	10	11	10	1.01629	0.925681
P05783	Keratin, type I cytoskeletal 18	KRT18	48.057	208.73	33.5	12	17	9	0.376676	0.000104816
P05976	Myosin light chain 1/3, skeletal muscle isoform	MYL1	21.145	9.8826	6.2	1	1	1
P06276	Cholinesterase	BCHE	68.417	86.885	13.5	9	16	8	1.53804	0.0106493
P06312	Ig kappa chain V-IV region	IGKV4-1	13.38	313.09	17.4	2	4	2	0.852141	0.539069
P06454	Prothymosin alpha	PTMA	12.203	6.1495	9.9	1	1	1
P06493	Cyclin-dependent kinase 1	CDK1	34.095	15.818	7.7	2	3	2	0.603999	0.0122897
P06576	ATP synthase subunit beta, mitochondrial	ATP5B	56.559	71.19	19.5	7	9	7	0.533957	0.00655895
P06681	Complement C2	C2	83.267	323.31	43.5	28	80	28	1.55786	0.00418844
P06702	Protein S100-A9	S100A9	13.242	16.865	18.4	2	2	2	1.96017	0.0900883
P06703	Protein S100-A6	S100A6	10.18	16.674	24.4	3	3	3	0.980117	0.904209
P06727	Apolipoprotein A-IV	APOA4	45.398	323.31	67.7	37	136	37	1.64574	0.044872
P06732	Creatine kinase M-type	CKM	43.101	35.031	14.2	5	5	4	1.46811	0.168712
P06733	Alpha-enolase	ENO1	47.168	95.798	21.7	9	14	8	0.396145	0.000227828
P06737	Glycogen phosphorylase, liver form	PYGL	97.147	6.6509	1.1	1	1	1
P06748	Nucleophosmin	NPM1	32.575	27.726	13.3	4	6	4	0.490721	0.0012304
P06753	Tropomyosin alpha-3 chain	TPM3	32.95	6.4828	9.8	3	1	1
P06756	Integrin alpha-V	ITGAV	116.04	6.7126	1.2	1	1	1
P07108	Acyl-CoA-binding protein	DBI	10.044	32.037	32.2	2	3	2	0.485495	0.00555265
P07148	Fatty acid-binding protein, liver	FABP1	14.208	5.9322	8.7	1	1	1	1.13743	0.311923
P07195	L-lactate dehydrogenase B chain	LDHB	36.638	54.046	22.8	7	14	6	0.848019	0.0818078
P07225	Vitamin K-dependent protein S	PROS1	75.122	323.31	30	22	54	22	1.53593	0.000809967
P07237	Protein disulfide-isomerase	P4HB	57.116	133.37	28.1	15	17	15	0.641745	0.00012668
P07307	Asialoglycoprotein receptor 2	ASGR2	35.092	6.4959	3.5	1	2	1	1.67187	0.00961123
P07327	Alcohol dehydrogenase 1A	ADH1A	39.858	5.9224	3.2	1	2	1
P07333	Macrophage colony-stimulating factor 1 receptor	CSF1R	107.98	21.424	2.5	2	2	2	1.21245	0.472831
P07339	Cathepsin D	CTSD	44.552	78.374	27.7	9	10	9	1.25119	0.213305
P07355	Annexin A2	ANXA2	38.604	95.761	36.9	15	19	15	0.389336	6.42623e-05
P07357	Complement component C8 alpha chain	C8A	65.163	323.31	32.7	17	57	17	1.76237	0.00291698
P07358	Complement component C8 beta chain	C8B	67.046	323.31	33.8	20	49	20	1.6887	0.00372498
P07359	Platelet glycoprotein Ib alpha chain	GP1BA	71.539	56.71	8.6	4	9	4	1.26264	0.167656
P07360	Complement component C8 gamma chain	C8G	22.277	315.88	58.4	12	28	12	1.66741	0.00259737
P07437	Tubulin beta chain	TUBB	49.67	13.924	16.9	6	8	1
P07451	Carbonic anhydrase 3	CA3	29.557	6.5567	4.6	1	1	1
P07602	Prosaposin	PSAP	58.112	39.146	12	6	10	6	1.08595	0.646579
P07686	Beta-hexosaminidase subunit beta	HEXB	63.111	26.566	8.5	4	5	4
P07737	Profilin-1	PFN1	15.054	33.917	35.7	4	5	4	0.565236	0.00507315
P07738	Bisphosphoglycerate mutase	BPGM	30.005	16.44	11.6	2	2	2	1.72616	0.0183062
P07814	Bifunctional glutamate/proline--tRNA ligase	EPRS	170.59	65.076	6.2	6	7	6	0.635089	0.00208436
P07858	Cathepsin B	CTSB	37.821	12.701	5.3	2	3	2	1.36699	0.230549
P07900	Heat shock protein HSP 90-alpha	HSP90AA1	84.659	87.402	24.9	16	26	9	0.549072	0.000285784
P07910	Heterogeneous nuclear ribonucleoproteins C1/C2	HNRNPC	33.67	48.775	15	6	7	6	0.102558	0.000210306
P07911	Uromodulin	UMOD	69.76	39.103	8.3	6	6	6	1.26666	0.171692
P07942	Laminin subunit beta-1	LAMB1	198.04	103.94	8.1	10	10	10	1.35235	0.123743
P07954	Fumarate hydratase, mitochondrial	FH	54.636	78.494	16.9	6	7	6	0.536201	0.0023704
P07998	Ribonuclease pancreatic	RNASE1	17.644	35.879	24.4	3	4	3	1.86389	0.00870085
P08123	Collagen alpha-2(I) chain	COL1A2	129.31	11.816	1.5	2	2	2	2.06679	0.0412551
P08133	Annexin A6	ANXA6	75.872	17.379	5.1	3	3	3	0.332271	0.000878971
P08174	Complement decay-accelerating factor	CD55	41.4	40.991	12.6	4	5	4
P08185	Corticosteroid-binding globulin	SERPINA6	45.14	144.42	20.5	7	19	7	1.5876	0.03919
P08195	4F2 cell-surface antigen heavy chain	SLC3A2	67.993	126.22	18.4	9	10	9	0.590829	0.0020354
P08238	Heat shock protein HSP 90-beta	HSP90AB1	83.263	258.27	25.4	17	33	9	0.502952	0.00110587
P08253	72 kDa type IV collagenase	MMP2	73.881	85.483	15.9	10	14	10	1.72746	0.00448743
P08294	Extracellular superoxide dismutase [Cu-Zn]	SOD3	25.851	28.573	17.9	3	4	3	1.48521	0.0991451
P08493	Matrix Gla protein	MGP	12.353	7.5341	10.7	1	1	1
P08519	Apolipoprotein(a)	LPA	501.31	144.56	28.8	14	17	14	1.69686	0.0937449
P08571	Monocyte differentiation antigen CD14	CD14	40.076	86.892	21.1	7	10	7	1.86546	0.00248367
P08579	U2 small nuclear ribonucleoprotein B	SNRPB2	25.486	20.09	16	3	3	3
P08581	Hepatocyte growth factor receptor	MET	155.54	53.005	3.9	5	5	5
P08603	Complement factor H	CFH	139.09	323.31	51.7	58	232	52	2.02195	0.0375643
P08621	U1 small nuclear ribonucleoprotein 70 kDa	SNRNP70	51.556	11.197	4.6	2	2	2	0.459588	0.00539257
P08637	Low affinity immunoglobulin gamma Fc region receptor III-A	FCGR3A	29.089	27.878	15.4	4	6	4	1.29467	0.254251
P08670	Vimentin	VIM	53.651	174.75	39.7	19	22	16	0.304176	0.000198189
P08697	Alpha-2-antiplasmin	SERPINF2	54.565	303.32	30.5	16	52	16	1.68534	0.000494793
P08708	40S ribosomal protein S17	RPS17	15.55	6.4067	8.1	1	2	1	0.884396	0.254164
P08758	Annexin A5	ANXA5	35.936	16.806	8.4	3	3	3	0.457934	0.00109855
P08865	40S ribosomal protein SA	RPSA	32.854	17.549	8.1	2	2	2
P08887	Interleukin-6 receptor subunit alpha	IL6R	51.547	6.9624	1.9	1	1	1	1.2924	0.220008
P09172	Dopamine beta-hydroxylase	DBH	69.064	136.38	16.2	8	16	8	1.26309	0.397458
P09211	Glutathione S-transferase P	GSTP1	23.356	25.97	26.7	4	5	4	0.921733	0.492597
P09382	Galectin-1	LGALS1	14.716	34.963	30.4	4	6	4	0.287232	0.000174289
P09417	Dihydropteridine reductase	QDPR	25.789	6.2594	7	1	1	1
P09429	High mobility group protein B1	HMGB1	24.893	6.1374	8.4	1	1	1
P09486	SPARC	SPARC	34.632	49.186	14.5	5	5	5	1.63061	0.0498984
P09493	Tropomyosin alpha-1 chain	TPM1	32.708	7.3271	7.4	2	1	1
P09619	Platelet-derived growth factor receptor beta	PDGFRB	123.97	14.056	1.8	2	2	2
P09622	Dihydrolipoyl dehydrogenase, mitochondrial	DLD	54.177	11.22	4.1	2	2	2
P09651	Heterogeneous nuclear ribonucleoprotein A1	HNRNPA1	38.746	91.305	14	4	7	4	0.741956	0.0718383
P09668	Pro-cathepsin H	CTSH	37.393	6.7765	3.9	1	1	1
P09871	Complement C1s subcomponent	C1S	76.684	323.31	32	19	51	19	1.75287	0.0115786
P09874	Poly [ADP-ribose] polymerase 1	PARP1	113.08	59.245	10.2	9	12	9	0.38994	0.00029873
P09960	Leukotriene A-4 hydrolase	LTA4H	69.284	58.842	13.6	6	8	6	1.39556	0.102011
P09972	Fructose-bisphosphate aldolase C	ALDOC	39.455	57.77	17.6	4	5	1	1.2519	0.181144
P0C0L4	Complement C4-A	C4A	192.78	323.31	39.3	77	358	3	1.76127	0.374787
P0C0L5	Complement C4-B	C4B	192.75	59.956	37	75	377	2	1.91885	0.0113934
P0DJD9	Pepsin A-5	PGA5	41.993	6.252	2.8	1	1	1	1.61977	0.0247936
P0DJI8	Serum amyloid A-1 protein	SAA1	13.532	59.344	48.4	6	9	3	2.77179	0.46809
P0DMV9	Heat shock 70 kDa protein 1B	HSPA1A	70.051	94.882	25.4	14	23	6	0.525391	0.0403674
P0DOX2	Immunoglobulin alpha-2 heavy chain	---	48.462	66.391	18.9	7	14	1
P0DOX5	Ig gamma-1 chain C region	IGHG1	48.986	222.16	32.5	11	42	5	1.76961	0.0479382
P0DOX7	Immunoglobulin kappa light chain	---	23.379	167.26	46.3	6	12	3	1.18511	0.513553
P0DOX8	Immunoglobulin lambda-like polypeptide 5	IGLL5	22.83	97.324	40.3	8	20	3	1.59432	0.00686012
P0DOY3	Ig lambda-6 chain C region	IGLC6	11.265	90.869	69.8	6	24	2	1.22504	0.172436
P0DP01	Ig heavy chain V-I region HG3	IGHV1-3	12.992	6.6394	9.4	1	1	1	1.45761	0.200829
P0DP02	Ig heavy chain V-III region KOL	IGHV3-33	12.989	5.9534	15.4	2	6	0
P0DP03	Ig heavy chain V-III region CAM	IGHV3-30	12.947	10.48	15.4	2	4	1	1.08053	0.741153
P0DP04	Ig heavy chain V-III region DOB	IGHV3-9	13.017	8.4755	9.3	1	3	1
P0DP08	Ig heavy chain V-II region NEWM	IGHV4-4	13.016	31.081	13.7	1	2	1	0.826801	0.42578
P0DP25	Calmodulin-3	CALM1	16.837	42.333	26.8	4	4	4	0.160248	3.05476e-05
P10124	Serglycin	SRGN	17.652	27.443	17.1	2	5	2	1.3725	0.502161
P10153	Non-secretory ribonuclease	RNASE2	18.354	8.0141	9.3	1	1	1
P10412	Histone H1.4	HIST1H1E	21.865	34.697	23.3	6	7	3	0.434656	0.00115955
P10451	Osteopontin	SPP1	35.422	32.087	10.5	2	2	2	2.24887	0.00369942
P10586	Receptor-type tyrosine-protein phosphatase F	PTPRF	212.88	39.51	4.2	6	6	6	1.77198	0.0523209
P10599	Thioredoxin	TXN	11.737	17.817	21	2	3	2	0.518198	0.0131047
P10606	Cytochrome c oxidase subunit 5B, mitochondrial	COX5B	13.696	6.0818	9.3	1	1	1
P10619	Lysosomal protective protein	CTSA	54.465	12.856	4.2	2	2	2	0.97781	0.912085
P10643	Complement component C7	C7	93.517	323.31	38.7	29	84	28	1.30792	0.15583
P10645	Chromogranin-A	CHGA	50.688	24.991	9.2	3	3	3
P10646	Tissue factor pathway inhibitor	TFPI	35.015	18.134	15.1	3	3	3	1.0174	0.89204
P10720	Platelet factor 4 variant	PF4V1	11.553	15.61	45.2	4	6	1	1.24289	0.363446
P10721	Mast/stem cell growth factor receptor Kit	KIT	109.86	48.64	6.2	6	6	6	1.74727	0.00724828
P10809	60 kDa heat shock protein, mitochondrial	HSPD1	61.054	220.97	36	17	19	17	0.388754	0.000288576
P10909	Clusterin	CLU	52.494	270.99	35.2	15	56	15	1.43547	0.034796
P11021	78 kDa glucose-regulated protein	HSPA5	72.332	222.27	34.1	20	32	18	0.702809	0.0429428
P11047	Laminin subunit gamma-1	LAMC1	177.6	55.184	5.5	7	7	7	1.54539	0.0637065
P11142	Heat shock cognate 71 kDa protein	HSPA8	70.897	133.94	27.2	16	28	11	0.347741	0.000421412
P11150	Hepatic triacylglycerol lipase	LIPC	55.914	11.954	6.6	2	2	2
P11166	Solute carrier family 2, facilitated glucose transporter member 1	SLC2A1	54.083	12.537	3.9	2	2	2
P11177	Pyruvate dehydrogenase E1 component subunit beta, mitochondrial	PDHB	39.233	6.2068	4.5	1	1	1	1.1728
P11215	Integrin alpha-M	ITGAM	127.18	13.568	2.7	2	2	2
P11226	Mannose-binding protein C	MBL2	26.143	251.29	34.7	7	12	7	1.53901	0.453846
P11233	Ras-related protein Ral-A	RALA	23.567	8.8405	6.8	1	1	1
P11279	Lysosome-associated membrane glycoprotein 1	LAMP1	44.882	21.814	6.5	3	4	3
P11362	Fibroblast growth factor receptor 1	FGFR1	91.867	15.682	3	2	3	2	1.49007	0.0542343
P11387	DNA topoisomerase 1	TOP1	90.725	35.771	7.6	5	6	5	0.235899	0.00186012
P11388	DNA topoisomerase 2-alpha	TOP2A	174.38	32.782	4.1	5	5	3
P11597	Cholesteryl ester transfer protein	CETP	54.756	26.915	7.5	4	6	4	1.2661	0.42469
P11717	Cation-independent mannose-6-phosphate receptor	IGF2R	274.37	123.19	7.7	18	19	18	1.41016	0.0207147
P11766	Alcohol dehydrogenase class-3	ADH5	39.724	12.057	8.8	2	2	2
P11940	Polyadenylate-binding protein 1	PABPC1	70.67	35.377	9.1	5	7	2	0.501663	0.00116532
P12004	Proliferating cell nuclear antigen	PCNA	28.768	24.715	10	2	2	2	0.464474	0.00849941
P12109	Collagen alpha-1(VI) chain	COL6A1	108.53	78.105	9.9	8	10	8	1.55958	0.00619672
P12111	Collagen alpha-3(VI) chain	COL6A3	343.67	217.34	8.3	24	28	24	1.46219	0.00967854
P12236	ADP/ATP translocase 3	SLC25A6	32.866	9.2068	10.1	3	5	1
P12259	Coagulation factor V	F5	251.7	323.31	21.9	46	63	38	1.63189	0.0244366
P12268	Inosine-5-monophosphate dehydrogenase 2	IMPDH2	55.804	23.571	8.4	4	4	4
P12270	Nucleoprotein TPR	TPR	267.29	52.568	2.4	4	4	4	0.775724	0.182019
P12273	Prolactin-inducible protein	PIP	16.572	7.6007	10.3	1	1	1	1.56275	0.0431709
P12277	Creatine kinase B-type	CKB	42.644	30.812	17.1	5	6	4	0.836638	0.132004
P12814	Alpha-actinin-1	ACTN1	103.06	29.566	10.3	8	9	4
P12821	Angiotensin-converting enzyme	ACE	149.71	65.995	8.1	9	9	9	1.62303	0.0130081
P12830	Cadherin-1	CDH1	97.455	66.578	10.4	8	12	8	1.35786	0.0497327
P12955	Xaa-Pro dipeptidase	PEPD	54.548	82.344	20.5	9	12	9	1.60476	0.00434527
P12956	X-ray repair cross-complementing protein 6	XRCC6	69.842	31.329	8.4	4	4	4
P13010	X-ray repair cross-complementing protein 5	XRCC5	82.704	35.663	5.6	3	5	3	0.269963	0.00069141
P13473	Lysosome-associated membrane glycoprotein 2	LAMP2	44.96	19.247	5.9	3	4	3	1.43758	0.00319533
P13489	Ribonuclease inhibitor	RNH1	49.973	50.686	9.8	4	4	4	1.01826	0.893343
P13591	Neural cell adhesion molecule 1	NCAM1	94.573	130.82	15.6	12	18	12	1.55436	0.00318007
P13598	Intercellular adhesion molecule 2	ICAM2	30.654	13.351	6.2	2	3	2	1.39311	0.272831
P13611	Versican core protein	VCAN	372.82	29.456	1.6	4	4	4	1.49912	0.241519
P13639	Elongation factor 2	EEF2	95.337	140.76	20.4	16	19	15	0.455863	0.000534831
P13667	Protein disulfide-isomerase A4	PDIA4	72.932	78.006	16	9	10	9	0.527506	0.000271475
P13671	Complement component C6	C6	104.79	323.31	35.5	33	89	33	1.68554	0.02669
P13716	Delta-aminolevulinic acid dehydratase	ALAD	36.294	8.8917	5.8	1	1	1
P13727	Bone marrow proteoglycan	PRG2	25.205	12.345	8.6	2	2	2	1.32751	0.362301
P13796	Plastin-2	LCP1	70.288	190.18	31.3	17	25	13	1.56909	0.0233258
P13797	Plastin-3	PLS3	70.81	24.424	10.6	7	8	3	0.590971	0.000870909
P13804	Electron transfer flavoprotein subunit alpha, mitochondrial	ETFA	35.079	20.983	12.6	3	3	3	0.502976	0.0020009
P13987	CD59 glycoprotein	CD59	14.177	18.259	17.2	2	2	2	1.20524	0.0610655
P14151	L-selectin	SELL	42.187	100.52	20.2	6	14	6	1.471	0.0597734
P14174	Macrophage migration inhibitory factor	MIF	12.476	6.9045	7.8	1	2	1	0.638633	0.0387417
P14207	Folate receptor beta	FOLR2	29.279	13.149	8.6	2	2	2
P14209	CD99 antigen	CD99	18.848	8.6764	5.4	1	1	1	1.42659	0.193778
P14314	Glucosidase 2 subunit beta	PRKCSH	59.425	45.957	12.1	6	7	6	0.702097	0.0228513
P14384	Carboxypeptidase M	CPM	50.513	12.063	2.9	1	1	1	1.32321	0.0392717
P14543	Nidogen-1	NID1	136.38	101.52	13.6	14	14	14	1.72075	0.0122996
P14618	Pyruvate kinase PKM	PKM	57.936	148.58	29.8	14	22	14	0.595516	0.00927512
P14625	Endoplasmin	HSP90B1	92.468	157	17.2	13	15	12	0.789174	0.127175
P14780	Matrix metalloproteinase-9	MMP9	78.457	12.737	2.5	2	2	2	1.2804	0.279638
P14866	Heterogeneous nuclear ribonucleoprotein L	HNRNPL	64.132	108.24	21.2	8	8	8	0.505525	0.00342527
P14923	Junction plakoglobin	JUP	81.744	29.292	6	4	6	4	1.05676	0.744665
P14927	Cytochrome b-c1 complex subunit 7	UQCRB	13.53	5.9239	7.2	1	1	1	1.34546	0.336393
P15088	Mast cell carboxypeptidase A	CPA3	48.669	6.9519	1.9	1	1	1	1.44864	0.0318405
P15090	Fatty acid-binding protein, adipocyte	FABP4	14.719	6.8185	9.1	1	1	1	1.60455	0.128109
P15121	Aldose reductase	AKR1B1	35.853	6.6893	2.8	1	1	1
P15144	Aminopeptidase N	ANPEP	109.54	133.94	17.5	16	24	16	1.44307	0.0249385
P15151	Poliovirus receptor	PVR	45.302	15.98	4.8	2	4	2
P15169	Carboxypeptidase N catalytic chain	CPN1	52.286	211.83	28.2	11	26	11	1.43469	0.0725402
P15311	Ezrin	EZR	69.412	24.038	14.2	8	8	4	0.498699	0.00156374
P15328	Folate receptor alpha	FOLR1	29.819	31.233	12.8	2	4	2	0.761436	0.0260427
P15531	Nucleoside diphosphate kinase A	NME1	17.149	45.675	35.5	5	5	4
P15559	NAD(P)H dehydrogenase [quinone] 1	NQO1	30.867	12.119	6.2	2	2	2	0.484121	0.00648577
P15880	40S ribosomal protein S2	RPS2	31.324	38.992	18.1	5	7	5	0.287083	0.00470325
P15924	Desmoplakin	DSP	331.77	63.494	3.6	11	11	11	1.60942	0.136946
P16035	Metalloproteinase inhibitor 2	TIMP2	24.399	17.823	10.9	3	3	3	1.68895	0.0179287
P16070	CD44 antigen	CD44	81.537	52.542	8.5	6	6	6	1.06861	0.675237
P16109	P-selectin	SELP	90.833	48.304	4.9	3	3	3
P16112	Aggrecan core protein	ACAN	261.33	10.896	0.6	2	2	2	1.73578	0.0189817
P16152	Carbonyl reductase [NADPH] 1	CBR1	30.375	6.8654	5.4	1	1	1	1.32381	0.505105
P16284	Platelet endothelial cell adhesion molecule	PECAM1	82.521	23.252	3.1	2	2	2
P16401	Histone H1.5	HIST1H1B	22.58	45.745	25.2	6	11	5	0.241188	5.37287e-05
P16402	Histone H1.3	HIST1H1D	22.35	11.301	22.6	5	5	2	0.177602	0.000695399
P16403	Histone H1.2	HIST1H1C	21.364	11.728	19.7	5	5	2	0.248989	4.0199e-05
P16581	E-selectin	SELE	66.655	13.513	3	2	2	2	1.63568	0.0255814
P16615	Sarcoplasmic/endoplasmic reticulum calcium ATPase 2	ATP2A2	114.76	44.521	6.5	6	6	6	0.6475	0.0238767
P16930	Fumarylacetoacetase	FAH	46.374	13.176	5.3	2	2	2
P17066	Heat shock 70 kDa protein 6	HSPA6	71.027	8.5434	7.6	4	10	1	0.712622	0.0311543
P17174	Aspartate aminotransferase, cytoplasmic	GOT1	46.247	20.568	7.7	3	3	3	1.33911	0.0512022
P17301	Integrin alpha-2	ITGA2	129.29	33.667	3.6	3	3	3	1.2899	0.0975242
P17655	Calpain-2 catalytic subunit	CAPN2	79.994	9.2915	2.4	1	1	1	0.863824	0.212368
P17813	Endoglin	ENG	70.577	75.178	11.4	6	9	6	1.28279	0.244041
P17844	Probable ATP-dependent RNA helicase DDX5	DDX5	69.147	97.45	23.1	14	15	9	0.257856	0.00117704
P17900	Ganglioside GM2 activator	GM2A	20.838	11.019	8.8	2	2	2	1.5116	0.074056
P17927	Complement receptor type 1	CR1	223.66	5.9616	1.7	1	1	1
P17936	Insulin-like growth factor-binding protein 3	IGFBP3	31.674	267.04	45.7	13	27	13	1.36312	0.00757598
P17980	26S protease regulatory subunit 6A	PSMC3	49.203	17.736	5.5	2	2	2	0.370255	0.000204145
P17987	T-complex protein 1 subunit alpha	TCP1	60.343	39.752	9.2	5	6	5	0.640892	0.00672567
P18065	Insulin-like growth factor-binding protein 2	IGFBP2	34.814	104.11	33.2	9	13	9	1.57497	0.268848
P18077	60S ribosomal protein L35a	RPL35A	12.538	18.475	22.7	3	3	3	0.226674	3.86113e-06
P18124	60S ribosomal protein L7	RPL7	29.225	59.861	19	5	7	5	0.427746	0.000823741
P18206	Vinculin	VCL	123.8	157.71	17.3	20	25	20	1.19638	0.133599
P18428	Lipopolysaccharide-binding protein	LBP	53.383	33.421	12.3	5	7	5	1.70857	0.153522
P18564	Integrin beta-6	ITGB6	85.935	5.9907	1.1	1	1	1	1.21684	0.344548
P18621	60S ribosomal protein L17	RPL17	21.397	28.024	17.9	3	3	3	0.111764	7.68293e-06
P18669	Phosphoglycerate mutase 1	PGAM1	28.804	21.117	17.7	3	6	3	0.621022	0.0121504
P18754	Regulator of chromosome condensation	RCC1	44.969	6.2622	3.1	1	1	1
P19021	Peptidyl-glycine alpha-amidating monooxygenase	PAM	108.33	10.865	1.7	2	2	2
P19022	Cadherin-2	CDH2	99.808	25.142	4.5	4	6	4
P19105	Myosin regulatory light chain 12A	MYL12A	19.794	15.478	11.7	2	2	2	0.564372	0.00449076
P19256	Lymphocyte function-associated antigen 3	CD58	28.147	7.4867	4	1	1	1
P19320	Vascular cell adhesion protein 1	VCAM1	81.275	158.9	23.7	16	24	16	1.34707	0.275298
P19338	Nucleolin	NCL	76.613	40.979	8.6	7	8	7	0.250603	0.000401367
P19367	Hexokinase-1	HK1	102.48	6.1298	1.1	1	1	1
P19652	Alpha-1-acid glycoprotein 2	ORM2	23.602	60.86	30.8	6	32	4	2.79436	0.104955
P19823	Inter-alpha-trypsin inhibitor heavy chain H2	ITIH2	106.46	323.31	26.7	27	141	27	1.45702	0.0252086
P19827	Inter-alpha-trypsin inhibitor heavy chain H1	ITIH1	101.39	323.31	27	23	97	19	1.4013	0.0785369
P19961	Alpha-amylase 2B	AMY2B	57.709	105.61	18	7	10	7	2.48128	0.165216
P20023	Complement receptor type 2	CR2	112.91	74.885	10.9	9	10	9	1.42993	0.0883287
P20042	Eukaryotic translation initiation factor 2 subunit 2	EIF2S2	38.388	12.897	7.8	2	2	2	0.374365	0.000190978
P20618	Proteasome subunit beta type-1	PSMB1	26.489	20.433	14.1	2	2	2	0.456195	0.00281558
P20645	Cation-dependent mannose-6-phosphate receptor	M6PR	30.993	6.531	5.1	1	1	1
P20700	Lamin-B1	LMNB1	66.408	89.516	17.7	10	11	10	0.435158	0.00212325
P20742	Pregnancy zone protein	PZP	163.86	309.92	21.5	30	49	24	2.18225	0.308124
P20774	Mimecan	OGN	33.922	19.189	9.4	3	3	3
P20810	Calpastatin	CAST	76.572	7.8117	2.4	1	1	1	0.732349
P20851	C4b-binding protein beta chain	C4BPB	28.357	64.791	29.8	7	18	7	1.51957	0.00772124
P20908	Collagen alpha-1(V) chain	COL5A1	183.56	7.3636	0.7	1	1	1
P20933	N(4)-(beta-N-acetylglucosaminyl)-L-asparaginase	AGA	37.208	27.678	11.3	3	3	3	1.89015	1.37361e-05
P20962	Parathymosin	PTMS	11.53	15.621	10.8	1	1	1
P21291	Cysteine and glycine-rich protein 1	CSRP1	20.567	60.899	25.4	3	3	3	0.325415	0.000141733
P21333	Filamin-A	FLNA	280.74	321.06	14.7	31	33	27	0.549127	0.00282905
P21709	Ephrin type-A receptor 1	EPHA1	108.13	15.919	2.9	2	2	2	1.45431	0.053243
P21796	Voltage-dependent anion-selective channel protein 1	VDAC1	30.772	24.422	12.7	3	4	3	0.248222	4.69605e-05
P22061	Protein-L-isoaspartate(D-aspartate) O-methyltransferase	PCMT1	24.636	7.9053	8.4	1	1	1	0.722812
P22087	rRNA 2-O-methyltransferase fibrillarin	FBL	33.784	17.554	12.5	3	3	3
P22102	Trifunctional purine biosynthetic protein adenosine-3	GART	107.77	11.912	2.5	2	2	2	1.30128	0.532654
P22105	Tenascin-X	TNXB	458.22	323.31	9.9	29	37	29	1.99737	0.0973787
P22234	Multifunctional protein ADE2	PAICS	47.079	12.695	4.9	2	2	2
P22307	Non-specific lipid-transfer protein	SCP2	58.993	6.5546	2.2	1	1	1
P22314	Ubiquitin-like modifier-activating enzyme 1	UBA1	117.85	104.81	10.2	8	8	8	1.28515	0.340657
P22352	Glutathione peroxidase 3	GPX3	25.552	157.24	37.2	8	22	8	1.10177	0.708104
P22455	Fibroblast growth factor receptor 4	FGFR4	87.953	6.4158	1.2	1	1	1	1.51413	0.116818
P22626	Heterogeneous nuclear ribonucleoproteins A2/B1	HNRNPA2B1	37.429	172.15	44.8	12	16	12	0.341163	7.47958e-05
P22692	Insulin-like growth factor-binding protein 4	IGFBP4	27.934	80.716	29.1	5	7	5	1.37294	0.0660987
P22695	Cytochrome b-c1 complex subunit 2, mitochondrial	UQCRC2	48.442	16.407	3.5	1	1	1	0.745256	0.0651869
P22792	Carboxypeptidase N subunit 2	CPN2	60.556	193.12	23.5	11	32	11	1.41778	0.0219964
P22891	Vitamin K-dependent protein Z	PROZ	44.743	72.734	18.5	7	14	7	1.59604	0.054092
P22897	Macrophage mannose receptor 1	MRC1	166.01	149.01	13.6	19	26	19	1.51235	0.0337937
P23141	Liver carboxylesterase 1	CES1	62.52	7.1032	2.5	1	1	1	1.87119	0.200685
P23142	Fibulin-1	FBLN1	77.213	112.62	17.2	11	20	11	1.4761	0.0725988
P23193	Transcription elongation factor A protein 1	TCEA1	33.969	6.7048	4.3	1	1	1	0.99034	0.975232
P23246	Splicing factor, proline- and glutamine-rich	SFPQ	76.149	38.634	8.9	6	8	6	0.329672	0.00122492
P23284	Peptidyl-prolyl cis-trans isomerase B	PPIB	23.742	33.027	16.2	3	4	3	0.337544	0.000607828
P23381	Tryptophan--tRNA ligase, cytoplasmic	WARS	53.165	6.7421	2.3	1	1	1
P23396	40S ribosomal protein S3	RPS3	26.688	41.517	20.6	5	9	5	0.341253	1.24324e-05
P23470	Receptor-type tyrosine-protein phosphatase gamma	PTPRG	162	37.991	4	5	8	5	1.40209	0.0282376
P23471	Receptor-type tyrosine-protein phosphatase zeta	PTPRZ1	254.58	6.0913	0.3	1	1	1
P23526	Adenosylhomocysteinase	AHCY	47.716	35.946	13.4	5	5	5	0.609011	0.00982448
P23528	Cofilin-1	CFL1	18.502	70.492	42.8	6	6	6	0.491712	0.0025837
P23588	Eukaryotic translation initiation factor 4B	EIF4B	69.15	36.857	4.1	2	3	2	0.0990119	0.000544783
P23921	Ribonucleoside-diphosphate reductase large subunit	RRM1	90.069	6.2117	1.6	1	1	1
P24043	Laminin subunit alpha-2	LAMA2	343.9	45.457	2.1	5	5	5	1.65283	0.0223877
P24387	Corticotropin-releasing factor-binding protein	CRHBP	36.144	17.897	9	3	4	3	1.38355	0.0679545
P24534	Elongation factor 1-beta	EEF1B2	24.763	14.683	10.7	2	2	2
P24592	Insulin-like growth factor-binding protein 6	IGFBP6	25.322	23.861	13.3	3	5	3	1.8657	0.00613541
P24593	Insulin-like growth factor-binding protein 5	IGFBP5	30.57	29.151	15.4	4	5	4	1.49011	0.00491269
P24666	Low molecular weight phosphotyrosine protein phosphatase	ACP1	18.042	10.136	7.6	1	1	1	0.691014	0.0773578
P24752	Acetyl-CoA acetyltransferase, mitochondrial	ACAT1	45.199	12.222	4.2	2	2	2
P24821	Tenascin	TNC	240.85	200.4	10.6	21	23	21	1.3301	0.388187
P25205	DNA replication licensing factor MCM3	MCM3	90.98	6.0846	1	1	1	1	0.0516509	0.000631594
P25311	Zinc-alpha-2-glycoprotein	AZGP1	34.258	244	50.7	19	85	19	1.66665	0.00884702
P25398	40S ribosomal protein S12	RPS12	14.515	27.592	25	3	3	3	0.325474	3.28956e-05
P25685	DnaJ homolog subfamily B member 1	DNAJB1	38.044	17.252	9.1	3	3	3
P25705	ATP synthase subunit alpha, mitochondrial	ATP5A1	59.75	67.66	15.9	8	10	8	0.625663	0.00283204
P25774	Cathepsin S	CTSS	37.495	43.782	12.7	3	5	3	0.923039	0.363685
P25786	Proteasome subunit alpha type-1	PSMA1	29.555	16.438	8	2	3	2	1.12835	0.157491
P25788	Proteasome subunit alpha type-3	PSMA3	28.433	6.4301	3.9	1	1	1
P25789	Proteasome subunit alpha type-4	PSMA4	29.483	18.019	10.3	3	4	3	0.61972	0.00228488
P26038	Moesin	MSN	67.819	69.669	17.5	11	13	7	0.920896	0.529728
P26368	Splicing factor U2AF 65 kDa subunit	U2AF2	53.5	6.685	2.1	1	1	1
P26373	60S ribosomal protein L13	RPL13	24.261	28.997	18	4	4	4	0.270626	1.37017e-05
P26447	Protein S100-A4	S100A4	11.728	6.0832	7.9	1	1	1	0.519571	0.0470536
P26599	Polypyrimidine tract-binding protein 1	PTBP1	57.221	13.484	3.2	2	2	2	0.121614	0.000133054
P26639	Threonine--tRNA ligase, cytoplasmic	TARS	83.434	21.297	4.6	3	3	3
P26641	Elongation factor 1-gamma	EEF1G	50.118	34.067	6.6	3	3	3	0.246253	0.000178861
P26885	Peptidyl-prolyl cis-trans isomerase FKBP2	FKBP2	15.649	6.1835	9.9	1	1	1
P26927	Hepatocyte growth factor-like protein	MST1	80.319	323.31	45.6	27	57	27	1.51924	0.0170171
P26992	Ciliary neurotrophic factor receptor subunit alpha	CNTFR	40.633	6.405	3.5	1	1	1
P27169	Serum paraoxonase/arylesterase 1	PON1	39.731	142.56	18.9	6	28	6	1.51154	0.0225259
P27348	14-3-3 protein theta	YWHAQ	27.764	73.571	26.9	7	7	5
P27487	Dipeptidyl peptidase 4	DPP4	88.278	74.637	12.7	11	13	11	1.44926	0.0046676
P27797	Calreticulin	CALR	48.141	54.456	18	6	9	6	0.592934	0.00165323
P27816	Microtubule-associated protein 4	MAP4	121	55.766	8.7	8	9	8	0.407092	0.00331795
P27824	Calnexin	CANX	67.567	83.329	19.8	11	15	11	0.28322	0.000227306
P27918	Properdin	CFP	51.276	274.26	32.4	16	38	16	1.45623	0.0662956
P27930	Interleukin-1 receptor type 2	IL1R2	45.421	12.43	5.3	2	3	2
P28066	Proteasome subunit alpha type-5	PSMA5	26.411	35.501	20.7	4	4	4	0.821582	0.0578024
P28070	Proteasome subunit beta type-4	PSMB4	29.204	6.6908	3.8	1	1	1
P28072	Proteasome subunit beta type-6	PSMB6	25.357	13.039	8.8	2	2	2
P28288	ATP-binding cassette sub-family D member 3	ABCD3	75.475	5.9867	2.4	1	1	1	1.32704	0.149602
P28799	Granulins	GRN	63.544	18.809	5.7	3	3	3	1.57562	0.027206
P28827	Receptor-type tyrosine-protein phosphatase mu	PTPRM	163.68	52.579	4.3	5	7	5	1.22174	0.172141
P28906	Hematopoietic progenitor cell antigen CD34	CD34	40.716	5.9789	2.1	1	1	1
P29279	Connective tissue growth factor	CTGF	38.091	11.527	6.6	2	2	2	1.73369	0.0495435
P29401	Transketolase	TKT	67.877	148.31	20.2	10	15	10	0.558578	0.00504907
P29622	Kallistatin	SERPINA4	48.541	171.9	32.8	14	46	14	1.4055	0.0433518
P29692	Elongation factor 1-delta	EEF1D	31.121	17.528	7.8	2	3	2	0.674635	0.0262246
P29966	Myristoylated alanine-rich C-kinase substrate	MARCKS	31.554	14.984	6.3	2	2	2
P30040	Endoplasmic reticulum resident protein 29	ERP29	28.993	13.327	8.4	2	2	2	0.218483	9.66619e-05
P30041	Peroxiredoxin-6	PRDX6	25.035	37.483	21.9	4	6	4	0.715645	0.127372
P30043	Flavin reductase (NADPH)	BLVRB	22.119	131.86	30.6	5	6	5	1.68249	0.00945707
P30044	Peroxiredoxin-5, mitochondrial	PRDX5	22.086	15.81	12.6	2	2	2	0.401289	0.000555033
P30048	Thioredoxin-dependent peroxide reductase, mitochondrial	PRDX3	27.692	14.323	7.8	2	2	2	0.368373	0.000607201
P30049	ATP synthase subunit delta, mitochondrial	ATP5D	17.49	16.82	13.7	2	2	2
P30050	60S ribosomal protein L12	RPL12	17.818	46.242	34.5	4	5	4	0.80542	0.213825
P30084	Enoyl-CoA hydratase, mitochondrial	ECHS1	31.387	26.385	15.2	3	3	3	0.645781	0.00907232
P30086	Phosphatidylethanolamine-binding protein 1	PEBP1	21.057	26.595	24.1	4	4	4
P30101	Protein disulfide-isomerase A3	PDIA3	56.782	101.31	23.2	11	17	11	0.504852	6.46742e-05
P30153	Serine/threonine-protein phosphatase 2A 65 kDa regulatory subunit A alpha isoform	PPP2R1A	65.308	11.744	3.2	2	2	2	0.655566	0.00181563
P30480	HLA class I histocompatibility antigen, B-42 alpha chain	HLA-B	40.332	7.5703	13.8	4	5	0
P30520	Adenylosuccinate synthetase isozyme 2	ADSS	50.097	6.1618	2.4	1	1	1
P30530	Tyrosine-protein kinase receptor UFO	AXL	98.336	9.1862	1.8	1	1	1	1.25815	0.364302
P31040	Succinate dehydrogenase [ubiquinone] flavoprotein subunit, mitochondrial	SDHA	72.691	13.651	4.5	2	2	2	0.264654	0.00133754
P31150	Rab GDP dissociation inhibitor alpha	GDI1	50.582	10.815	6.9	2	2	2	1.00869	0.941972
P31151	Protein S100-A7	S100A7	11.471	12.205	22.8	2	2	2
P31153	S-adenosylmethionine synthase isoform type-2	MAT2A	43.66	20.637	8.1	3	3	3	0.640179	0.0185401
P31327	Carbamoyl-phosphate synthase [ammonia], mitochondrial	CPS1	164.94	195.87	16.1	22	28	22	0.351504	0.000486748
P31930	Cytochrome b-c1 complex subunit 1, mitochondrial	UQCRC1	52.645	11.34	4.2	1	2	1	0.945411	0.786912
P31939	Bifunctional purine biosynthesis protein PURH	ATIC	64.615	6.2659	2.5	1	1	1
P31942	Heterogeneous nuclear ribonucleoprotein H3	HNRNPH3	36.926	20.453	7.5	2	2	2
P31943	Heterogeneous nuclear ribonucleoprotein H	HNRNPH1	49.229	70.711	16.9	6	8	5	0.535574	0.011921
P31944	Caspase-14	CASP14	27.679	12.743	9.1	2	2	2
P31946	14-3-3 protein beta/alpha	YWHAB	28.082	46.157	13.8	3	4	1
P31947	14-3-3 protein sigma	SFN	27.774	6.0221	9.3	3	4	1	1.10724	0.755374
P31948	Stress-induced-phosphoprotein 1	STIP1	62.639	28.269	8.1	4	5	4	0.373772	0.000408557
P31949	Protein S100-A11	S100A11	11.74	13.537	17.1	2	3	2	0.530275	0.0143622
P32004	Neural cell adhesion molecule L1	L1CAM	140	33.993	5.2	5	5	5	0.754755	0.125043
P32119	Peroxiredoxin-2	PRDX2	21.892	50.931	35.9	8	12	7	3.42002	0.0735834
P32320	Cytidine deaminase	CDA	16.185	9.4358	11.6	1	1	1
P32942	Intercellular adhesion molecule 3	ICAM3	59.54	10.82	2.9	2	2	2
P32969	60S ribosomal protein L9	RPL9	21.863	34.397	12.5	2	2	2	0.238089	0.000315875
P33151	Cadherin-5	CDH5	87.527	153.2	16.2	10	20	10	1.50115	0.0158061
P33240	Cleavage stimulation factor subunit 2	CSTF2	60.959	5.9818	1.4	1	1	1
P33316	Deoxyuridine 5-triphosphate nucleotidohydrolase, mitochondrial	DUT	26.563	6.5904	4	1	1	1
P33908	Mannosyl-oligosaccharide 1,2-alpha-mannosidase IA	MAN1A1	72.968	42.317	9.3	6	9	6	1.51744	0.015756
P33991	DNA replication licensing factor MCM4	MCM4	96.557	25.149	4.6	4	4	4
P33992	DNA replication licensing factor MCM5	MCM5	82.285	35.71	8.3	5	5	5	0.870259	0.203764
P33993	DNA replication licensing factor MCM7	MCM7	81.307	7.1905	2.1	1	2	1	0.789908	0.161555
P34096	Ribonuclease 4	RNASE4	16.84	38.948	25.9	4	6	4	1.48684	0.022156
P34897	Serine hydroxymethyltransferase, mitochondrial	SHMT2	55.992	20.365	6.2	3	3	2
P34932	Heat shock 70 kDa protein 4	HSPA4	94.33	50.609	11.4	7	8	7	0.577624	0.00107127
P35080	Profilin-2	PFN2	15.046	16.382	10	1	1	1
P35232	Prohibitin	PHB	29.804	29.461	15.1	4	4	4	0.526148	0.0250561
P35247	Pulmonary surfactant-associated protein D	SFTPD	37.728	6.5038	4	1	1	1
P35268	60S ribosomal protein L22	RPL22	14.787	18.367	18.8	2	3	2	0.607911	0.00388148
P35443	Thrombospondin-4	THBS4	105.87	163.37	19.3	15	23	13	2.0704	0.00931347
P35542	Serum amyloid A-4 protein	SAA4	14.746	42.8	35.4	5	14	5	1.66525	0.0119911
P35555	Fibrillin-1	FBN1	312.24	195.44	7.5	19	21	19	1.51046	0.0444829
P35579	Myosin-9	MYH9	226.53	99.726	8.5	15	17	15	0.677519	0.00670349
P35590	Tyrosine-protein kinase receptor Tie-1	TIE1	125.09	47.623	4.6	4	5	4	1.51831	0.0582085
P35610	Sterol O-acyltransferase 1	SOAT1	64.734	19.091	3.8	1	1	1
P35613	Basigin	BSG	42.2	10.505	3.6	1	2	1	0.300112	0.00990582
P35637	RNA-binding protein FUS	FUS	53.425	72.836	11.2	4	6	3
P35659	Protein DEK	DEK	42.674	7.6757	3.5	1	1	1	0.311726	0.00143733
P35858	Insulin-like growth factor-binding protein complex acid labile subunit	IGFALS	66.034	208.85	23.8	14	28	14	1.38202	0.0110035
P35916	Vascular endothelial growth factor receptor 3	FLT4	152.76	78.064	9	10	13	10	1.49658	0.10595
P36222	Chitinase-3-like protein 1	CHI3L1	42.625	14.221	5	2	2	2	2.51693	0.132801
P36542	ATP synthase subunit gamma, mitochondrial	ATP5C1	32.996	15.023	7	2	3	2	1.16285	0.250063
P36578	60S ribosomal protein L4	RPL4	47.697	42.404	14.1	6	8	6	0.999645	0.997977
P36871	Phosphoglucomutase-1	PGM1	61.448	11.765	4.1	2	2	2
P36873	Serine/threonine-protein phosphatase PP1-gamma catalytic subunit	PPP1CC	36.983	14.433	7.4	2	2	2
P36955	Pigment epithelium-derived factor	SERPINF1	46.312	217.94	34.9	15	55	15	1.71618	0.0156156
P36957	Dihydrolipoyllysine-residue succinyltransferase component of 2-oxoglutarate dehydrogenase complex, mitochondrial	DLST	48.755	12.011	4.4	2	2	2	0.520205	0.0125343
P36980	Complement factor H-related protein 2	CFHR2	30.65	35.292	34.4	9	22	5	1.60146	0.244832
P37108	Signal recognition particle 14 kDa protein	SRP14	14.57	12.567	9.6	1	1	1
P37802	Transgelin-2	TAGLN2	22.391	60.228	24.1	4	8	4	0.332032	0.00108193
P37837	Transaldolase	TALDO1	37.54	67.924	29.1	10	12	10	1.07525	0.420232
P37840	Alpha-synuclein	SNCA	14.46	8.1266	9.3	1	2	1
P38117	Electron transfer flavoprotein subunit beta	ETFB	27.843	13.146	7.8	2	2	2	0.757964	0.0675745
P38159	RNA-binding motif protein, X chromosome	RBMX	42.331	63.279	19.9	9	11	9	0.332164	0.000297436
P38570	Integrin alpha-E	ITGAE	130.16	6.1959	0.7	1	1	1	0.324744	0.00293933
P38646	Stress-70 protein, mitochondrial	HSPA9	73.68	109.28	26.5	14	17	14	0.492495	0.00238783
P38919	Eukaryotic initiation factor 4A-III	EIF4A3	46.871	26.472	12.7	5	5	4	0.379596	0.0473647
P39019	40S ribosomal protein S19	RPS19	16.06	46.764	41.4	6	7	6	0.30132	0.000183165
P39023	60S ribosomal protein L3	RPL3	46.108	9.6027	3	1	2	1	0.126494	1.8565e-05
P39059	Collagen alpha-1(XV) chain	COL15A1	141.72	24.026	1.2	1	1	1
P39060	Collagen alpha-1(XVIII) chain	COL18A1	178.19	48.601	2.6	4	6	4	1.57561	0.000103435
P39656	Dolichyl-diphosphooligosaccharide--protein glycosyltransferase 48 kDa subunit	DDOST	50.8	6.5817	2.4	1	1	1
P39687	Acidic leucine-rich nuclear phosphoprotein 32 family member A	ANP32A	28.585	12.336	13.3	3	3	2
P39748	Flap endonuclease 1	FEN1	42.592	44.527	9.5	3	3	3	0.582358	0.00520023
P40189	Interleukin-6 receptor subunit beta	IL6ST	103.54	50.264	6.3	4	4	4	1.58085	0.0177518
P40197	Platelet glycoprotein V	GP5	60.958	39.681	13.4	5	6	5	1.2574	0.254536
P40199	Carcinoembryonic antigen-related cell adhesion molecule 6	CEACAM6	37.194	6.0986	6.1	1	1	1
P40227	T-complex protein 1 subunit zeta	CCT6A	58.024	32.275	6.8	4	4	4	0.235615	0.000157816
P40429	60S ribosomal protein L13a	RPL13A	23.577	30.508	14.8	3	4	3	0.498584	0.0113672
P40925	Malate dehydrogenase, cytoplasmic	MDH1	36.426	44.036	21.3	7	7	7	0.960189	0.814874
P40926	Malate dehydrogenase, mitochondrial	MDH2	35.503	72.245	24.9	7	8	7	0.205363	0.000179857
P40939	Trifunctional enzyme subunit alpha, mitochondrial	HADHA	82.999	44.708	8.8	5	5	5
P41222	Prostaglandin-H2 D-isomerase	PTGDS	21.029	36.249	27.9	5	7	5	1.65531	0.0111619
P41235	Hepatocyte nuclear factor 4-alpha	HNF4A	52.784	6.3474	2.1	1	1	1	1.67403	0.237827
P42166	Lamina-associated polypeptide 2, isoform alpha	TMPO	75.491	93.812	12.5	6	7	2
P42330	Aldo-keto reductase family 1 member C3	AKR1C3	36.853	6.8167	6.8	1	1	1
P42704	Leucine-rich PPR motif-containing protein, mitochondrial	LRPPRC	157.9	72.783	8.2	11	12	11	0.341993	0.000289065
P42765	3-ketoacyl-CoA thiolase, mitochondrial	ACAA2	41.924	14.539	7.8	2	3	2	0.282755	0.00405284
P42771	Cyclin-dependent kinase inhibitor 2A, isoforms 1/2/3	CDKN2A	16.532	19.832	29.5	3	3	3	1.94712	0.0103269
P42785	Lysosomal Pro-X carboxypeptidase	PRCP	55.799	26.252	6.5	3	3	3	1.43687	0.00485202
P43121	Cell surface glycoprotein MUC18	MCAM	71.607	86.147	14.4	9	14	9	1.29689	0.16737
P43243	Matrin-3	MATR3	94.622	59.535	11.2	8	9	8	0.395417	0.00224522
P43251	Biotinidase	BTD	61.132	77.764	18.2	9	20	9	1.56857	0.00469533
P43652	Afamin	AFM	69.068	323.31	38.6	27	102	27	1.5424	0.008043
P45880	Voltage-dependent anion-selective channel protein 2	VDAC2	31.566	68.01	15	3	7	3	0.429519	0.00320836
P46013	Antigen KI-67	MKI67	358.69	23.696	2.1	4	4	4	0.516771	0.0276639
P46060	Ran GTPase-activating protein 1	RANGAP1	63.541	6.3019	2	1	1	1
P46087	Probable 28S rRNA (cytosine(4447)-C(5))-methyltransferase	NOP2	89.301	29.201	6.5	4	4	4	0.4391	0.00388046
P46531	Neurogenic locus notch homolog protein 1	NOTCH1	272.5	15.691	0.9	2	3	2	1.59511	0.031566
P46776	60S ribosomal protein L27a	RPL27A	16.561	34.924	34.5	5	8	5	0.182423	3.94769e-05
P46777	60S ribosomal protein L5	RPL5	34.362	14.274	7.7	2	3	2	0.105493	0.0002559
P46778	60S ribosomal protein L21	RPL21	18.565	10.769	5	2	2	2	0.436584	0.00212519
P46779	60S ribosomal protein L28	RPL28	15.747	8.6398	8	1	1	1	0.11476	1.94785e-05
P46781	40S ribosomal protein S9	RPS9	22.591	17.665	10.3	3	3	3	1.48806	0.0302315
P46783	40S ribosomal protein S10	RPS10	18.898	37.077	17.6	2	2	2	1.30606	0.535182
P46940	Ras GTPase-activating-like protein IQGAP1	IQGAP1	189.25	52.665	5.7	8	9	8	0.678395	0.00439167
P46977	Dolichyl-diphosphooligosaccharide--protein glycosyltransferase subunit STT3A	STT3A	80.529	6.2318	1.3	1	1	1
P47756	F-actin-capping protein subunit beta	CAPZB	31.35	6.4665	5.1	1	1	1	0.513959	0.00515217
P47813	Eukaryotic translation initiation factor 1A, X-chromosomal	EIF1AX	16.46	11.823	14.6	2	2	2	0.560843	0.000146597
P47897	Glutamine--tRNA ligase	QARS	87.798	12.53	3	2	2	2	0.684017	0.657901
P47914	60S ribosomal protein L29	RPL29	17.752	11.991	9.4	1	1	1	0.764223	0.0508146
P48047	ATP synthase subunit O, mitochondrial	ATP5O	23.277	20.783	19.7	3	3	3	0.38025	5.11068e-05
P48637	Glutathione synthetase	GSS	52.384	17.052	6.1	3	3	3	1.20471	0.0690136
P48643	T-complex protein 1 subunit epsilon	CCT5	59.67	20.686	5.7	3	3	3	0.413317	0.00011591
P48740	Mannan-binding lectin serine protease 1	MASP1	79.246	228.46	27.2	17	36	17	1.48517	0.00763141
P49207	60S ribosomal protein L34	RPL34	13.293	17.217	22.2	3	3	3	0.327811	0.00466382
P49257	Protein ERGIC-53	LMAN1	57.548	26.427	4.1	2	2	2
P49321	Nuclear autoantigenic sperm protein	NASP	85.237	10.426	1.8	2	2	2
P49327	Fatty acid synthase	FASN	273.42	70.896	5.7	10	11	10	0.779515	0.339784
P49368	T-complex protein 1 subunit gamma	CCT3	60.533	33.471	10.5	5	6	5	0.393885	0.000251649
P49411	Elongation factor Tu, mitochondrial	TUFM	49.541	39.578	12.4	4	4	4	0.605005
P49448	Glutamate dehydrogenase 2, mitochondrial	GLUD2	61.433	6.949	2.2	1	1	1	0.80214	0.0376667
P49458	Signal recognition particle 9 kDa protein	SRP9	10.112	8.7248	12.8	1	1	1	0.184663	0.000469254
P49641	Alpha-mannosidase 2x	MAN2A2	130.54	26.849	4.4	4	5	4	1.35675	0.0580249
P49720	Proteasome subunit beta type-3	PSMB3	22.949	10.932	7.8	1	1	1
P49736	DNA replication licensing factor MCM2	MCM2	101.89	14.783	2.4	2	3	2	0.424258	0.00460938
P49747	Cartilage oligomeric matrix protein	COMP	82.86	215.6	25.5	15	13	9	1.93916	0.0650031
P49792	E3 SUMO-protein ligase RanBP2	RANBP2	358.2	12.316	1.6	2	2	2	0.471011	0.00175948
P49908	Selenoprotein P	SEPP1	43.173	54.568	14.7	7	16	7	1.29375	0.298273
P49913	Cathelicidin antimicrobial peptide	CAMP	19.301	61.023	31.2	7	8	7	1.02911	0.940365
P49915	GMP synthase [glutamine-hydrolyzing]	GMPS	76.715	19.908	4.6	3	3	3
P50395	Rab GDP dissociation inhibitor beta	GDI2	50.663	38.873	13.5	4	4	4	0.856758	0.329431
P50416	Carnitine O-palmitoyltransferase 1, liver isoform	CPT1A	88.367	12.125	3.4	2	2	2	0.634543	0.0358511
P50454	Serpin H1	SERPINH1	46.44	27.618	11.2	4	5	4	0.565911	0.000854942
P50552	Vasodilator-stimulated phosphoprotein	VASP	39.829	6.1808	2.4	1	1	1
P50895	Basal cell adhesion molecule	BCAM	67.404	13.274	4	2	2	2	1.24279	0.27327
P50914	60S ribosomal protein L14	RPL14	23.432	12.723	9.8	2	3	2	0.0831337	0.000817938
P50990	T-complex protein 1 subunit theta	CCT8	59.62	81.312	21.5	10	13	10	0.265987	0.000290813
P50991	T-complex protein 1 subunit delta	CCT4	57.924	43.972	7.6	3	4	3	0.284437	8.1216e-05
P50995	Annexin A11	ANXA11	54.389	8.7196	3.2	1	1	1
P51148	Ras-related protein Rab-5C	RAB5C	23.482	15.978	10.6	2	2	2
P51149	Ras-related protein Rab-7a	RAB7A	23.489	26.083	23.2	4	4	4	0.266889	0.00116995
P51571	Translocon-associated protein subunit delta	SSR4	18.998	6.5063	6.4	1	1	1	0.32014	0.00136945
P51572	B-cell receptor-associated protein 31	BCAP31	27.991	6.3964	3.7	1	1	1
P51659	Peroxisomal multifunctional enzyme type 2	HSD17B4	79.685	5.9689	1.5	1	1	1
P51858	Hepatoma-derived growth factor	HDGF	26.788	48.461	27.5	5	6	5	0.298469	3.28903e-05
P51884	Lumican	LUM	38.429	145.6	29	10	29	7	1.82158	0.00125993
P51991	Heterogeneous nuclear ribonucleoprotein A3	HNRNPA3	39.594	7.2412	2.6	1	1	1	0.251662	5.09907e-05
P52209	6-phosphogluconate dehydrogenase, decarboxylating	PGD	53.139	47.556	15.1	6	7	6	1.10209	0.451831
P52272	Heterogeneous nuclear ribonucleoprotein M	HNRNPM	77.515	51.095	10.5	8	8	8	0.447921	0.00111827
P52292	Importin subunit alpha-1	KPNA2	57.861	10.625	2.8	1	1	1	0.337797	0.00153996
P52565	Rho GDP-dissociation inhibitor 1	ARHGDIA	23.207	17.061	7.4	1	1	1
P52597	Heterogeneous nuclear ribonucleoprotein F	HNRNPF	45.671	15.32	8.2	3	4	2	0.407807	0.00719408
P53007	Tricarboxylate transport protein, mitochondrial	SLC25A1	34.012	5.8831	3.9	1	1	1
P53396	ATP-citrate synthase	ACLY	120.84	42.791	6.3	7	7	7	0.575372	0.00331254
P53597	Succinyl-CoA ligase [ADP/GDP-forming] subunit alpha, mitochondrial	SUCLG1	36.249	15.138	9	2	2	2
P53618	Coatomer subunit beta	COPB1	107.14	6.5981	1.4	1	1	1	0.778205	0.476197
P53634	Dipeptidyl peptidase 1	CTSC	51.853	28.264	5.8	2	2	2	1.41007	0.0621853
P53999	Activated RNA polymerase II transcriptional coactivator p15	SUB1	14.395	12.348	14.2	2	2	2
P54108	Cysteine-rich secretory protein 3	CRISP3	27.63	117.74	32.2	6	13	6	1.40717	0.171699
P54136	Arginine--tRNA ligase, cytoplasmic	RARS	75.378	15.458	4.5	2	2	2	0.790346	0.00879045
P54289	Voltage-dependent calcium channel subunit alpha-2/delta-1	CACNA2D1	124.57	155.21	16	15	16	15	1.14234	0.519494
P54709	Sodium/potassium-transporting ATPase subunit beta-3	ATP1B3	31.512	13.152	8.2	2	2	2
P54727	UV excision repair protein RAD23 homolog B	RAD23B	43.171	96.259	15.9	5	5	5	0.508341	0.00397708
P54764	Ephrin type-A receptor 4	EPHA4	109.86	21.865	3.1	3	3	3	1.63787	0.0752714
P54802	Alpha-N-acetylglucosaminidase	NAGLU	82.265	27.662	6.7	5	5	5	1.48572	0.151782
P54886	Delta-1-pyrroline-5-carboxylate synthase	ALDH18A1	87.301	13.001	2.5	2	2	2	0.717782	0.135609
P55056	Apolipoprotein C-IV	APOC4	14.553	57.992	37	7	11	7	1.70663	0.157366
P55058	Phospholipid transfer protein	PLTP	54.739	65.968	12	6	11	6	1.32995	0.111239
P55060	Exportin-2	CSE1L	110.42	14.36	2.7	2	2	2	0.598211	0.00863007
P55072	Transitional endoplasmic reticulum ATPase	VCP	89.321	26.916	6	4	5	4	0.479584	0.00265626
P55084	Trifunctional enzyme subunit beta, mitochondrial	HADHB	51.294	7.4615	3	1	1	1	0.276136	0.00183377
P55103	Inhibin beta C chain	INHBC	38.237	29.885	10.2	3	4	3	1.48199	0.0845101
P55209	Nucleosome assembly protein 1-like 1	NAP1L1	45.374	17.187	4.6	1	1	1	0.340192	0.0318939
P55263	Adenosine kinase	ADK	40.545	6.4538	3.9	1	1	1	0.369546	0.00566191
P55285	Cadherin-6	CDH6	88.308	20.329	4.8	3	3	3	1.55052	0.130315
P55290	Cadherin-13	CDH13	78.286	90.684	17.4	11	16	11	1.34988	0.036095
P55769	NHP2-like protein 1	NHP2L1	14.173	7.6036	9.4	1	1	1	0.534557	0.00342396
P55774	C-C motif chemokine 18	CCL18	9.8487	12.322	15.7	1	1	1	1.20982	0.43565
P55899	IgG receptor FcRn large subunit p51	FCGRT	39.743	7.0034	4.7	1	1	1
P56385	ATP synthase subunit e, mitochondrial	ATP5I	7.9331	7.1139	14.5	1	1	1	0.454221	0.00620782
P58335	Anthrax toxin receptor 2	ANTXR2	53.666	26.535	5.1	2	2	2	1.64286	0.00348922
P59666	Neutrophil defensin 3	DEFA3	10.245	12.997	19.1	2	2	2	1.70272	0.126057
P59998	Actin-related protein 2/3 complex subunit 4	ARPC4	19.667	6.0956	6.5	1	1	1
P60033	CD81 antigen	CD81	25.809	19.02	8.5	1	1	1
P60174	Triosephosphate isomerase	TPI1	30.791	120.24	47.9	10	14	10	0.728853	0.0269631
P60660	Myosin light polypeptide 6	MYL6	16.93	16.98	13.9	2	3	2	0.551502	0.00525553
P60673	Profilin-3	PFN3	14.596	6.1448	6.6	1	1	1
P60842	Eukaryotic initiation factor 4A-I	EIF4A1	46.153	47.251	13.1	5	7	4	0.701722	0.00328652
P60866	40S ribosomal protein S20	RPS20	13.373	21.472	26.9	3	3	3	0.557961	0.000572393
P60891	Ribose-phosphate pyrophosphokinase 1	PRPS1	34.834	6.3316	4.1	1	1	1
P60900	Proteasome subunit alpha type-6	PSMA6	27.399	22.749	11.8	3	3	3	1.84211	0.00191947
P60903	Protein S100-A10	S100A10	11.203	30.579	17.5	2	5	2	0.136861	0.000105349
P60953	Cell division control protein 42 homolog	CDC42	21.258	29.227	22.5	4	4	3	0.537823	0.000350203
P61019	Ras-related protein Rab-2A	RAB2A	23.545	27.003	23.6	4	4	4	0.585329	0.00717928
P61026	Ras-related protein Rab-10	RAB10	22.541	6.1202	9	2	3	1	0.449171	0.000831854
P61106	Ras-related protein Rab-14	RAB14	23.897	6.2507	4.2	1	1	1
P61158	Actin-related protein 3	ACTR3	47.371	11.101	7.4	2	2	2	1.31261	0.218294
P61160	Actin-related protein 2	ACTR2	44.76	7.5197	3.3	1	1	1	1.07199	0.431012
P61224	Ras-related protein Rap-1b	RAP1B	20.825	19.71	15.2	3	3	3	0.751028	0.0396283
P61247	40S ribosomal protein S3a	RPS3A	29.945	33.798	20.1	5	5	5	0.109984	1.58005e-05
P61289	Proteasome activator complex subunit 3	PSME3	29.506	13.304	9.4	2	2	2
P61313	60S ribosomal protein L15	RPL15	24.146	19.415	16.2	3	3	3
P61353	60S ribosomal protein L27	RPL27	15.798	15.365	15.4	1	1	1
P61513	60S ribosomal protein L37a	RPL37A	10.275	14.538	19.6	1	1	1
P61586	Transforming protein RhoA	RHOA	21.768	7.0319	5.7	1	1	1	0.858412	0.44139
P61604	10 kDa heat shock protein, mitochondrial	HSPE1	10.932	17.745	27.5	3	3	3	0.444683	0.000109594
P61626	Lysozyme C	LYZ	16.537	42.553	34.5	6	11	6	1.50488	0.0561969
P61769	Beta-2-microglobulin	B2M	13.714	25.835	22.7	3	5	3	1.49427	0.0566007
P61803	Dolichyl-diphosphooligosaccharide--protein glycosyltransferase subunit DAD1	DAD1	12.497	7.6217	10.6	1	2	1	0.397398	0.000482469
P61916	Epididymal secretory protein E1	NPC2	16.57	38.428	21.9	3	3	3	1.3206	0.0978244
P61956	Small ubiquitin-related modifier 2	SUMO2	10.871	20.506	23.2	2	3	2	0.610215	0.0274476
P61964	WD repeat-containing protein 5	WDR5	36.588	6.0031	4.5	1	1	1
P61978	Heterogeneous nuclear ribonucleoprotein K	HNRNPK	50.976	81.911	16.4	6	8	6	0.688566	0.0710614
P61981	14-3-3 protein gamma	YWHAG	28.302	12.243	13.8	4	5	2
P62081	40S ribosomal protein S7	RPS7	22.127	8.2156	4.6	1	1	1	0.261923	1.82901e-05
P62191	26S protease regulatory subunit 4	PSMC1	49.184	7.1978	3	1	1	1	0.700208	0.0183476
P62241	40S ribosomal protein S8	RPS8	24.205	46.894	31.7	5	7	5	0.293985	0.000145339
P62244	40S ribosomal protein S15a	RPS15A	14.839	12.412	12.3	2	2	2	0.260089	3.91207e-05
P62249	40S ribosomal protein S16	RPS16	16.445	7.4866	6.8	1	1	1
P62258	14-3-3 protein epsilon	YWHAE	29.174	43.939	25.5	6	6	4	0.461778	0.000618375
P62263	40S ribosomal protein S14	RPS14	16.273	21.532	15.9	2	2	2
P62269	40S ribosomal protein S18	RPS18	17.718	15.666	13.8	2	3	2
P62277	40S ribosomal protein S13	RPS13	17.222	15.173	10.6	2	3	2	0.534997	0.000842023
P62280	40S ribosomal protein S11	RPS11	18.431	34.652	27.2	5	6	5	0.20372	1.93908e-05
P62314	Small nuclear ribonucleoprotein Sm D1	SNRPD1	13.281	11.997	10.9	1	1	1
P62316	Small nuclear ribonucleoprotein Sm D2	SNRPD2	13.527	19.45	23.7	3	3	3	0.441777	0.00627512
P62333	26S protease regulatory subunit 10B	PSMC6	44.172	25.672	7.2	2	2	2	0.800032	0.608201
P62424	60S ribosomal protein L7a	RPL7A	29.995	64.55	25.6	6	9	6	0.425258	0.000132109
P62633	Cellular nucleic acid-binding protein	CNBP	19.463	11.255	7.3	1	2	1
P62701	40S ribosomal protein S4, X isoform	RPS4X	29.597	28.607	13.7	3	4	3	0.265553	0.000211733
P62750	60S ribosomal protein L23a	RPL23A	17.695	13.263	11.5	2	2	2	0.160811	1.46453e-05
P62753	40S ribosomal protein S6	RPS6	28.68	25.362	13.7	3	4	3	0.430157	2.43901e-06
P62805	Histone H4	HIST1H4A	11.367	51.962	42.7	5	14	5	0.241036	0.000281961
P62820	Ras-related protein Rab-1A	RAB1A	22.677	20.441	13.2	3	4	1
P62826	GTP-binding nuclear protein Ran	RAN	24.423	39.297	24.1	5	9	5	0.185502	4.3373e-06
P62829	60S ribosomal protein L23	RPL23	14.865	22.006	23.6	3	4	3	0.38361	4.21311e-05
P62841	40S ribosomal protein S15	RPS15	17.04	7.2688	8.3	1	2	1	0.377797	0.00383315
P62851	40S ribosomal protein S25	RPS25	13.742	5.9459	8	1	1	1
P62857	40S ribosomal protein S28	RPS28	7.8409	19.93	46.4	3	3	3	0.622838	0.00433883
P62873	Guanine nucleotide-binding protein G(I)/G(S)/G(T) subunit beta-1	GNB1	37.377	7.9604	5.6	1	1	1
P62879	Guanine nucleotide-binding protein G(I)/G(S)/G(T) subunit beta-2	GNB2	37.331	6.0203	5.6	1	1	1
P62888	60S ribosomal protein L30	RPL30	12.784	33.312	31.3	3	5	3	0.677242	0.0241385
P62899	60S ribosomal protein L31	RPL31	14.463	15.338	14.4	2	2	2
P62906	60S ribosomal protein L10a	RPL10A	24.831	43.3	30	6	7	6	0.670039	0.00639428
P62910	60S ribosomal protein L32	RPL32	15.86	11.136	10.4	2	2	2	0.241679	0.000843125
P62913	60S ribosomal protein L11	RPL11	20.252	21.072	16.9	3	4	3	1.37912	0.345186
P62917	60S ribosomal protein L8	RPL8	28.024	8.7655	6.2	1	1	1
P62937	Peptidyl-prolyl cis-trans isomerase A	PPIA	18.012	48.363	20.6	3	6	3	0.38354	0.00067325
P62942	Peptidyl-prolyl cis-trans isomerase FKBP1A	FKBP1A	11.951	16.445	25	2	2	2
P62987	Ubiquitin-60S ribosomal protein L40	UBA52	14.728	15.802	19.5	2	5	2	0.656461	0.0710625
P63000	Ras-related C3 botulinum toxin substrate 1	RAC1	21.45	6.2624	13	2	2	1
P63010	AP-2 complex subunit beta	AP2B1	104.55	16.21	2.5	2	2	2	0.405726	0.000550985
P63092	Guanine nucleotide-binding protein G(s) subunit alpha isoforms short	GNAS	45.664	6.4623	5.1	2	2	1
P63104	14-3-3 protein zeta/delta	YWHAZ	27.745	50.168	25.3	6	6	4	0.411705	7.29181e-06
P63162	Small nuclear ribonucleoprotein-associated protein N	SNRPN	24.614	13.885	6.2	1	1	1
P63208	S-phase kinase-associated protein 1	SKP1	18.658	14.626	12.9	2	3	2	0.501966	0.00028027
P63244	Guanine nucleotide-binding protein subunit beta-2-like 1	GNB2L1	35.076	47.863	19.6	5	7	5	0.289792	3.1655e-05
P63261	Actin, cytoplasmic 2	ACTG1	41.792	286.24	36.5	11	42	4	0.583978	0.00057136
P63267	Actin, gamma-enteric smooth muscle	ACTG2	41.876	13.978	23.9	8	37	1	0.331455	0.000574245
P67809	Nuclease-sensitive element-binding protein 1	YBX1	35.924	43.746	10.2	2	2	2	0.292797	5.13731e-06
P67936	Tropomyosin alpha-4 chain	TPM4	28.521	62.328	28.2	8	4	4	1.08417	0.573155
P68363	Tubulin alpha-1B chain	TUBA1B	50.151	154.47	31.9	11	16	0
P68366	Tubulin alpha-4A chain	TUBA4A	49.924	24.829	28.8	10	13	3	0.483897	0.000315438
P68371	Tubulin beta-4B chain	TUBB4B	49.83	49.036	16.9	6	8	1
P68871	Hemoglobin subunit beta	HBB	15.998	192.88	75.5	9	23	5	0.928849	0.922987
P69892	Hemoglobin subunit gamma-2	HBG2	16.126	37.035	23.8	3	3	3
P78324	Tyrosine-protein phosphatase non-receptor type substrate 1	SIRPA	54.966	48.441	13.1	6	7	6	1.78281	0.0259958
P78344	Eukaryotic translation initiation factor 4 gamma 2	EIF4G2	102.36	16.62	3.4	2	3	2
P78347	General transcription factor II-I	GTF2I	112.42	29.846	6.1	5	6	5	0.738173	0.0104234
P78371	T-complex protein 1 subunit beta	CCT2	57.488	33.988	11	5	6	5	0.511975	0.000234253
P78417	Glutathione S-transferase omega-1	GSTO1	27.566	40.336	18.3	4	6	4
P78504	Protein jagged-1	JAG1	133.8	5.8716	1.1	1	1	1
P78509	Reelin	RELN	388.38	30.832	1.4	4	4	4
P78527	DNA-dependent protein kinase catalytic subunit	PRKDC	469.08	65.938	2.7	9	9	9	0.890824	0.501572
P80108	Phosphatidylinositol-glycan-specific phospholipase D	GPLD1	92.335	219.51	19.2	15	35	15	1.36332	0.0134265
P80188	Neutrophil gelatinase-associated lipocalin	LCN2	22.588	48.201	20.7	3	4	3	1.37467	0.26794
P80723	Brain acid soluble protein 1	BASP1	22.693	106.85	39.6	8	10	8	0.329492	0.000465583
P81605	Dermcidin	DCD	11.284	25.1	22.7	3	6	3	2.22168	0.0864276
P82094	TATA element modulatory factor	TMF1	122.84	7.2086	1.3	1	1	1
P82909	28S ribosomal protein S36, mitochondrial	MRPS36	11.466	6.8072	17.5	1	1	1
P82979	SAP domain-containing ribonucleoprotein	SARNP	23.671	38.146	12.9	2	2	2	0.543327	0.000215301
P83731	60S ribosomal protein L24	RPL24	17.779	24.781	19.1	4	5	4	0.382847	8.36326e-05
P83881	60S ribosomal protein L36a	RPL36A	12.441	12.666	16	2	3	2	0.280567	3.89757e-05
P84085	ADP-ribosylation factor 5	ARF5	20.529	6.4301	5.6	1	1	1
P84098	60S ribosomal protein L19	RPL19	23.466	15.225	13.3	2	2	2
P98160	Basement membrane-specific heparan sulfate proteoglycan core protein	HSPG2	468.83	323.31	9.7	32	40	32	1.4798	0.0471641
P99999	Cytochrome c	CYCS	11.749	35.073	32.4	4	5	4	0.413629	0.00342906
Q00059	Transcription factor A, mitochondrial	TFAM	29.096	8.2093	5.3	1	1	1
Q00325	Phosphate carrier protein, mitochondrial	SLC25A3	40.094	16.856	5.8	2	2	2	0.533613	0.00473261
Q00341	Vigilin	HDLBP	141.45	10.505	2.1	2	2	2
Q00610	Clathrin heavy chain 1	CLTC	191.61	108.43	8.1	11	15	11	0.525533	0.0023531
Q00688	Peptidyl-prolyl cis-trans isomerase FKBP3	FKBP3	25.177	6.2948	4.9	1	1	1
Q00839	Heterogeneous nuclear ribonucleoprotein U	HNRNPU	90.583	101.93	12.2	9	15	9	0.287498	0.000461518
Q01082	Spectrin beta chain, non-erythrocytic 1	SPTBN1	274.61	43.727	3.6	7	7	6	0.620698	0.00786399
Q01105	Protein SET	SET	33.488	34.826	11.7	3	5	3	0.357488	0.000692345
Q01459	Di-N-acetylchitobiase	CTBS	43.759	42.027	11.7	5	8	5	1.58738	0.0269986
Q01518	Adenylyl cyclase-associated protein 1	CAP1	51.901	18.79	6.7	3	3	3
Q01650	Large neutral amino acids transporter small subunit 1	SLC7A5	55.01	30.199	5.9	2	2	2	0.410625	0.000559337
Q02218	2-oxoglutarate dehydrogenase, mitochondrial	OGDH	115.93	9.2963	1.6	1	1	1
Q02413	Desmoglein-1	DSG1	113.75	14.863	3.1	2	2	2	1.26178	0.314506
Q02487	Desmocollin-2	DSC2	99.961	26.849	3.7	3	3	3	1.49738	0.0356078
Q02543	60S ribosomal protein L18a	RPL18A	20.762	14.631	12.5	2	2	2	0.69323	0.0231504
Q02763	Angiopoietin-1 receptor	TEK	125.83	7.1373	1.6	1	1	1
Q02790	Peptidyl-prolyl cis-trans isomerase FKBP4	FKBP4	51.804	17.795	7.2	2	2	2	1.75739	0.0233436
Q02818	Nucleobindin-1	NUCB1	53.879	46.815	15.2	6	6	6	1.16011	0.584955
Q02878	60S ribosomal protein L6	RPL6	32.728	35.512	13.9	4	5	4	0.282549	1.15055e-05
Q02880	DNA topoisomerase 2-beta	TOP2B	183.26	5.9126	2.2	3	3	1	0.611435	0.414111
Q02985	Complement factor H-related protein 3	CFHR3	37.323	35.037	23.6	6	14	2	2.54254	0.0628698
Q03154	Aminoacylase-1	ACY1	45.884	16.481	7.6	3	3	3	1.44681	0.0884108
Q03591	Complement factor H-related protein 1	CFHR1	37.65	147.71	29.7	10	33	1	3.30097	0.0305945
Q04323	UBX domain-containing protein 1	UBXN1	33.325	18.241	9.4	2	2	2
Q04637	Eukaryotic translation initiation factor 4 gamma 1	EIF4G1	175.49	35.384	3.6	5	5	5	0.206666
Q04721	Neurogenic locus notch homolog protein 2	NOTCH2	265.4	38.388	2.3	5	5	5	1.45756	0.0400235
Q04756	Hepatocyte growth factor activator	HGFAC	70.681	236.85	33.7	18	40	18	1.71737	0.0403898
Q04837	Single-stranded DNA-binding protein, mitochondrial	SSBP1	17.259	12.539	11.5	2	2	2	0.281393	0.00264932
Q05639	Elongation factor 1-alpha 2	EEF1A2	50.47	17.097	10.4	5	6	2	0.502042	0.00244695
Q05682	Caldesmon	CALD1	93.23	46.049	6.8	4	7	4	0.644547	0.0116033
Q06033	Inter-alpha-trypsin inhibitor heavy chain H3	ITIH3	99.848	275.87	24	20	41	20	1.87637	0.114804
Q06141	Regenerating islet-derived protein 3-alpha	REG3A	19.395	12.439	10.3	2	3	2
Q06323	Proteasome activator complex subunit 1	PSME1	28.723	6.6579	4.8	1	1	1
Q06830	Peroxiredoxin-1	PRDX1	22.11	77.742	49.2	10	15	9	0.542188	0.00515392
Q07020	60S ribosomal protein L18	RPL18	21.634	40.115	19.7	3	4	3	0.304822	6.83281e-05
Q07021	Complement component 1 Q subcomponent-binding protein, mitochondrial	C1QBP	31.362	11.082	4.6	1	1	1
Q07065	Cytoskeleton-associated protein 4	CKAP4	66.022	19.551	5.8	3	3	3
Q07075	Glutamyl aminopeptidase	ENPEP	109.24	34.519	6.3	5	5	5	1.34395	0.0499168
Q07666	KH domain-containing, RNA-binding, signal transduction-associated protein 1	KHDRBS1	48.227	21.474	5.2	2	2	2	0.308668	0.00196976
Q07954	Prolow-density lipoprotein receptor-related protein 1	LRP1	504.6	211.53	7	28	33	28	1.28978	0.112176
Q07955	Serine/arginine-rich splicing factor 1	SRSF1	27.744	32.31	17.3	4	5	4	0.100582	0.00048799
Q08211	ATP-dependent RNA helicase A	DHX9	140.96	50.145	5	6	8	6	0.427327	0.000915436
Q08257	Quinone oxidoreductase	CRYZ	35.206	5.9547	3.3	1	1	1
Q08380	Galectin-3-binding protein	LGALS3BP	65.33	245.53	29.2	15	37	15	1.31337	0.27728
Q08945	FACT complex subunit SSRP1	SSRP1	81.074	23.304	5.4	3	3	3
Q08J23	tRNA (cytosine(34)-C(5))-methyltransferase	NSUN2	86.47	42.453	10.3	5	5	5	0.350527	0.0968943
Q09666	Neuroblast differentiation-associated protein AHNAK	AHNAK	629.09	174.66	13.3	23	29	23	0.597106	0.00376118
Q10471	Polypeptide N-acetylgalactosaminyltransferase 2	GALNT2	64.732	12.514	3.3	2	2	2
Q10588	ADP-ribosyl cyclase/cyclic ADP-ribose hydrolase 2	BST1	35.724	20.693	8.8	3	3	3	1.14243	0.462347
Q12788	Transducin beta-like protein 3	TBL3	89.034	6.0143	1.7	1	1	1
Q12797	Aspartyl/asparaginyl beta-hydroxylase	ASPH	85.862	14.372	3.3	1	1	1
Q12805	EGF-containing fibulin-like extracellular matrix protein 1	EFEMP1	54.64	162.83	34.1	15	29	15	1.69022	0.00149409
Q12841	Follistatin-related protein 1	FSTL1	34.985	39.737	18.8	7	8	7	1.76594	0.0298946
Q12860	Contactin-1	CNTN1	113.32	82.717	10	10	13	10	1.44274	0.0872556
Q12866	Tyrosine-protein kinase Mer	MERTK	110.25	8.0445	1	1	1	1	1.3751	0.207772
Q12874	Splicing factor 3A subunit 3	SF3A3	58.848	8.01	2.4	1	2	1	0.543493	0.0515753
Q12884	Seprase	FAP	87.711	18.854	4.7	4	5	3	1.66371	0.0139721
Q12905	Interleukin enhancer-binding factor 2	ILF2	43.062	26.453	12.3	3	4	3	0.216973	0.0015283
Q12906	Interleukin enhancer-binding factor 3	ILF3	95.337	23.721	3.4	3	5	3	0.387586	0.00163217
Q12907	Vesicular integral-membrane protein VIP36	LMAN2	40.228	23.977	10.7	4	4	4	1.3233	0.0973505
Q12913	Receptor-type tyrosine-protein phosphatase eta	PTPRJ	145.94	50.944	3.7	4	8	4	1.5911	0.000434596
Q12931	Heat shock protein 75 kDa, mitochondrial	TRAP1	80.109	11.445	2.6	2	2	2
Q13093	Platelet-activating factor acetylhydrolase	PLA2G7	50.077	49.45	10.2	4	5	4	1.10686	0.573205
Q13103	Secreted phosphoprotein 24	SPP2	24.337	33.585	21.3	4	5	4	1.34272	0.041903
Q13151	Heterogeneous nuclear ribonucleoprotein A0	HNRNPA0	30.84	13.105	6.6	2	2	2
Q13155	Aminoacyl tRNA synthase complex-interacting multifunctional protein 2	AIMP2	35.348	8.0868	4.1	1	1	1	0.73194	0.188377
Q13185	Chromobox protein homolog 3	CBX3	20.811	17.398	13.7	2	3	2	0.476562	0.00270853
Q13200	26S proteasome non-ATPase regulatory subunit 2	PSMD2	100.2	9.9214	1.3	1	1	1	0.561883	0.00542037
Q13201	Multimerin-1	MMRN1	138.11	140.91	11.5	11	15	11	1.41817	0.340674
Q13228	Selenium-binding protein 1	SELENBP1	52.39	28.44	10.6	5	5	5	1.85118	0.0255525
Q13247	Serine/arginine-rich splicing factor 6	SRSF6	39.586	35.3	14.2	5	6	5
Q13310	Polyadenylate-binding protein 4	PABPC4	70.782	7.0719	7.6	4	5	1
Q13332	Receptor-type tyrosine-protein phosphatase S	PTPRS	217.04	41.122	4	5	6	5	1.56384	0.0878397
Q13347	Eukaryotic translation initiation factor 3 subunit I	EIF3I	36.501	5.9157	4	1	1	1	1.08126	0.504845
Q13421	Mesothelin	MSLN	68.985	14.144	3.3	2	2	2	1.58361	0.119635
Q13428	Treacle protein	TCOF1	152.1	17.617	2	3	3	3	0.305944	0.00181669
Q13442	28 kDa heat- and acid-stable phosphoprotein	PDAP1	20.63	19.52	17.1	3	3	3	0.399511	0.00157903
Q13449	Limbic system-associated membrane protein	LSAMP	37.393	33.21	15.4	5	5	5	1.47597	0.0500791
Q13501	Sequestosome-1	SQSTM1	47.687	6.398	4.8	1	1	1	1.15297	0.348899
Q13573	SNW domain-containing protein 1	SNW1	61.494	6.653	2.8	1	1	1
Q13595	Transformer-2 protein homolog alpha	TRA2A	32.688	39.025	10.6	2	2	2
Q13740	CD166 antigen	ALCAM	65.102	80.316	17.7	9	14	9	1.42096	0.0411402
Q13765	Nascent polypeptide-associated complex subunit alpha	NACA	23.384	26.277	13.5	2	3	2	0.621707	0.0139682
Q13790	Apolipoprotein F	APOF	35.399	23.07	8.3	2	5	2	1.46069	0.0787614
Q13813	Spectrin alpha chain, non-erythrocytic 1	SPTAN1	284.54	106.04	6.6	14	14	14	0.537468	0.014742
Q13822	Ectonucleotide pyrophosphatase/phosphodiesterase family member 2	ENPP2	98.993	47.372	7	5	6	5	1.20291	0.436955
Q13838	Spliceosome RNA helicase DDX39B	DDX39B	48.991	13.382	4	2	2	2
Q13867	Bleomycin hydrolase	BLMH	52.562	32.169	11.2	5	6	5	1.70783	0.0164681
Q13939	Calicin	CCIN	66.581	7.3516	2.7	1	1	1
Q14019	Coactosin-like protein	COTL1	15.945	17.264	17.6	3	3	3	0.729819	0.0174967
Q14103	Heterogeneous nuclear ribonucleoprotein D0	HNRNPD	38.434	37.003	6.8	2	6	2	0.215907	0.00115756
Q14118	Dystroglycan	DAG1	97.44	17.893	4	3	3	3
Q14126	Desmoglein-2	DSG2	122.29	103.9	9.6	8	9	8	1.13527	0.413434
Q14151	Scaffold attachment factor B2	SAFB2	107.47	11.41	3.5	3	3	2
Q14152	Eukaryotic translation initiation factor 3 subunit A	EIF3A	166.57	12.358	1.3	2	3	2
Q14165	Malectin	MLEC	32.233	6.8411	4.5	1	1	1
Q14204	Cytoplasmic dynein 1 heavy chain 1	DYNC1H1	532.4	23.468	0.9	4	4	4	1.37457	0.231342
Q14247	Src substrate cortactin	CTTN	61.585	26.478	7.3	3	3	3	0.866513	0.559785
Q14444	Caprin-1	CAPRIN1	78.365	30.837	5.8	4	5	4	0.288284	6.44102e-05
Q14515	SPARC-like protein 1	SPARCL1	75.207	120.46	21.5	10	11	10	1.26484	0.0830652
Q14520	Hyaluronan-binding protein 2	HABP2	62.671	305.87	33.4	17	43	17	1.5276	0.0389269
Q14574	Desmocollin-3	DSC3	99.968	6.9105	1.1	1	1	1	1.78837	0.0114373
Q14624	Inter-alpha-trypsin inhibitor heavy chain H4	ITIH4	103.36	323.31	35.8	33	164	31	1.43894	0.034175
Q14683	Structural maintenance of chromosomes protein 1A	SMC1A	143.23	23.541	4.2	4	5	4	0.710119	0.0436257
Q14697	Neutral alpha-glucosidase AB	GANAB	106.87	51.508	9.1	8	8	8	0.648189	0.0104274
Q14766	Latent-transforming growth factor beta-binding protein 1	LTBP1	186.79	64.732	6.4	8	8	8	1.51119	0.195647
Q14847	LIM and SH3 domain protein 1	LASP1	29.717	37.254	21.5	5	5	5	0.461954	0.00373017
Q14956	Transmembrane glycoprotein NMB	GPNMB	63.922	17.898	4.7	2	2	2	1.69703	0.158035
Q14974	Importin subunit beta-1	KPNB1	97.169	41.133	5.1	4	4	4	1.01384	0.940258
Q14978	Nucleolar and coiled-body phosphoprotein 1	NOLC1	73.602	18.463	4.1	3	3	3	0.119593	0.000201717
Q14980	Nuclear mitotic apparatus protein 1	NUMA1	238.26	16.782	1.7	3	3	3
Q14993	Collagen alpha-1(XIX) chain	COL19A1	115.22	6.8886	1.2	1	3	1	1.66722	0.01189
Q15005	Signal peptidase complex subunit 2	SPCS2	25.003	23.047	9.7	1	1	1
Q15008	26S proteasome non-ATPase regulatory subunit 6	PSMD6	45.531	6.2846	2.3	1	1	1	0.443319	0.000319733
Q15029	116 kDa U5 small nuclear ribonucleoprotein component	EFTUD2	109.43	33.885	6.6	5	6	4
Q15046	Lysine--tRNA ligase	KARS	68.047	32.914	10.2	5	5	5	0.426761	0.00119327
Q15056	Eukaryotic translation initiation factor 4H	EIF4H	27.385	6.8493	5.2	1	1	1
Q15063	Periostin	POSTN	93.313	67.496	8.7	7	8	7	1.6902	0.00545815
Q15084	Protein disulfide-isomerase A6	PDIA6	48.121	27.486	7	2	3	2
Q15102	Platelet-activating factor acetylhydrolase IB subunit gamma	PAFAH1B3	25.734	8.4952	7.4	1	1	1
Q15113	Procollagen C-endopeptidase enhancer 1	PCOLCE	47.972	178.46	32.3	11	15	11	1.4366	0.0640238
Q15149	Plectin	PLEC	531.78	153.37	5.8	23	23	23	0.625314	0.0118778
Q15155	Nodal modulator 1	NOMO1	134.32	14.036	2.1	2	2	2	1.1949	0.0564927
Q15166	Serum paraoxonase/lactonase 3	PON3	39.607	72.154	25.4	7	8	7	1.3331	0.26631
Q15181	Inorganic pyrophosphatase	PPA1	32.66	51.01	22.8	4	5	4	0.523485	0.000401107
Q15185	Prostaglandin E synthase 3	PTGES3	18.697	18.466	13.8	2	3	2
Q15233	Non-POU domain-containing octamer-binding protein	NONO	54.231	127.93	22.5	9	12	9	0.487807	0.00146788
Q15286	Ras-related protein Rab-35	RAB35	23.025	7.1747	5.5	1	1	1
Q15293	Reticulocalbin-1	RCN1	38.89	27.49	15.4	4	4	4	0.658043	0.0206078
Q15365	Poly(rC)-binding protein 1	PCBP1	37.497	63.072	22.5	6	7	3	0.545098	0.00839097
Q15366	Poly(rC)-binding protein 2	PCBP2	38.58	21.824	17.5	5	6	2
Q15370	Transcription elongation factor B polypeptide 2	TCEB2	13.133	17.8	18.6	2	2	2
Q15393	Splicing factor 3B subunit 3	SF3B3	135.58	13.313	2.1	2	3	2	0.517988	0.0088513
Q15424	Scaffold attachment factor B1	SAFB	102.64	26.699	5	4	5	3	0.442505	0.0103098
Q15459	Splicing factor 3A subunit 1	SF3A1	88.885	11.781	3	2	2	2	1.07661	0.538269
Q15485	Ficolin-2	FCN2	34.001	25.187	10.5	4	7	4	2.11142	0.00244415
Q15517	Corneodesmosin	CDSN	51.522	6.4328	1.7	1	1	1
Q15582	Transforming growth factor-beta-induced protein ig-h3	TGFBI	74.68	151.72	24.5	15	31	15	1.58943	0.00450103
Q15691	Microtubule-associated protein RP/EB family member 1	MAPRE1	29.999	11.559	6	2	2	2
Q15717	ELAV-like protein 1	ELAVL1	36.091	16.431	7.4	2	3	2	0.723172	0.0079192
Q15758	Neutral amino acid transporter B(0)	SLC1A5	56.598	11.192	3.7	1	1	1
Q15819	Ubiquitin-conjugating enzyme E2 variant 2	UBE2V2	16.363	7.866	6.9	1	1	1
Q15828	Cystatin-M	CST6	16.511	15.874	14.1	2	3	2	1.70405	0.0482065
Q15848	Adiponectin	ADIPOQ	26.413	22.209	12.3	2	2	2
Q15942	Zyxin	ZYX	61.277	9.6001	3.3	1	1	1
Q16181	Septin-7	SEPT7	50.679	5.9291	2.1	1	1	1
Q16186	Proteasomal ubiquitin receptor ADRM1	ADRM1	42.153	6.462	3.9	1	1	1
Q16270	Insulin-like growth factor-binding protein 7	IGFBP7	29.13	52.368	27.7	5	5	5	1.52785	0.0123529
Q16531	DNA damage-binding protein 1	DDB1	126.97	17.908	2.5	3	3	3	0.738567	0.0970319
Q16576	Histone-binding protein RBBP7	RBBP7	47.82	29.833	8.9	3	6	3	0.52442	0.00990168
Q16610	Extracellular matrix protein 1	ECM1	60.673	319.18	38.5	19	41	19	1.77944	0.00411987
Q16620	BDNF/NT-3 growth factors receptor	NTRK2	91.998	7.5642	1.9	1	1	1	1.4259	0.0500179
Q16627	C-C motif chemokine 14	CCL14	10.678	9.1127	11.8	1	2	1	1.36324	0.277776
Q16629	Serine/arginine-rich splicing factor 7	SRSF7	27.366	14.031	8.8	2	2	1	0.123252	0.000125491
Q16643	Drebrin	DBN1	71.428	25.942	6.2	4	5	4	0.404068	0.00309049
Q16658	Fascin	FSCN1	54.529	47.144	15.2	7	8	7	0.508919	0.000188841
Q16706	Alpha-mannosidase 2	MAN2A1	131.14	48.746	6.8	7	9	7	1.46688	0.0820516
Q16778	Histone H2B type 2-E	HIST2H2BE	13.92	7.1995	40.5	6	11	0
Q16799	Reticulon-1	RTN1	83.617	5.9695	1	1	1	1
Q16853	Membrane primary amine oxidase	AOC3	84.621	90.985	13.6	10	10	10	1.39321	0.121858
Q16881	Thioredoxin reductase 1, cytoplasmic	TXNRD1	70.905	6.585	1.7	1	1	1	0.6312	0.0451449
Q16891	MICOS complex subunit MIC60	IMMT	83.677	13.296	3.2	2	2	2
Q27J81	Inverted formin-2	INF2	135.62	6.1606	1.2	1	1	1
Q29963	HLA class I histocompatibility antigen, Cw-6 alpha chain	HLA-C	40.968	25.429	16.4	5	6	2
Q2VIR3	Putative eukaryotic translation initiation factor 2 subunit 3-like protein	EIF2S3L	51.228	23.784	9.7	4	4	4
Q52LJ0	Protein FAM98B	FAM98B	37.19	6.0409	3.3	1	1	1
Q53R41	FAST kinase domain-containing protein 1	FASTKD1	97.41	6.5546	1.4	1	1	1	1.36881	0.0988444
Q5JRA6	Melanoma inhibitory activity protein 3	MIA3	213.7	10.697	1	2	2	2
Q5JTJ3	Cytochrome c oxidase assembly factor 6 homolog	COA6	14.116	12.014	10.4	1	1	1
Q5R3I4	Tetratricopeptide repeat protein 38	TTC38	52.787	-2	2.1	1	1	1
Q5SZB4	Uncharacterized protein C9orf50	C9orf50	47.639	6.0274	2.1	1	1	1	1.60384	0.0761998
Q5T2D2	Trem-like transcript 2 protein	TREML2	35.126	6.4292	3.1	1	1	1
Q5T749	Keratinocyte proline-rich protein	KPRP	64.135	10.87	3.8	2	2	2
Q5VTE0	Putative elongation factor 1-alpha-like 3	EEF1A1P5	50.184	57.632	21.4	8	11	5	0.306455	0.000229936
Q5VY43	Platelet endothelial aggregation receptor 1	PEAR1	110.67	36.439	6.4	4	4	4
Q68D06	Schlafen family member 13	SLFN13	102.04	6.3383	1.1	1	1	1	1.51932	0.269154
Q6DD88	Atlastin-3	ATL3	60.541	9.489	1.8	1	1	1	0.748321	0.122872
Q6EMK4	Vasorin	VASN	71.712	83.98	9.8	6	10	6	1.56039	0.0151248
Q6IN84	rRNA methyltransferase 1, mitochondrial	MRM1	38.638	6.0832	2	1	1	1	1.39874	0.150502
Q6N069	N-alpha-acetyltransferase 16, NatA auxiliary subunit	NAA16	101.46	7.2841	1.3	1	1	1
Q6NZI2	Polymerase I and transcript release factor	PTRF	43.476	10.245	4.4	1	1	1	0.456903	0.0166491
Q6P179	Endoplasmic reticulum aminopeptidase 2	ERAP2	110.46	17.147	2.6	3	3	3	1.28921	0.0324359
Q6P2Q9	Pre-mRNA-processing-splicing factor 8	PRPF8	273.6	18.946	1.4	3	3	3	0.246128	0.00496391
Q6P387	Uncharacterized protein C16orf46	C16orf46	43.417	6.7962	2.5	1	3	1	1.41907	0.225287
Q6UVK1	Chondroitin sulfate proteoglycan 4	CSPG4	250.53	22.686	1.7	4	4	4
Q6UWP8	Suprabasin	SBSN	60.54	92.57	17.6	3	5	3	1.92545	0.0180108
Q6UX71	Plexin domain-containing protein 2	PLXDC2	59.582	27.081	5.3	3	3	3	1.41369	0.0203514
Q6UXB8	Peptidase inhibitor 16	PI16	49.471	93.356	17.3	7	11	7	1.42613	0.149741
Q6UY14	ADAMTS-like protein 4	ADAMTSL4	116.54	91.376	6.8	5	6	5	1.57283	0.116672
Q6YHK3	CD109 antigen	CD109	161.69	65.905	7.1	8	8	8	1.31441	0.106254
Q71DI3	Histone H3.2	HIST2H3A	15.388	19.234	18.4	3	8	1	0.309031	2.12567e-05
Q71UI9	Histone H2A.V	H2AFV	13.509	14.084	13.3	2	3	2	0.402174	0.00116505
Q76LX8	A disintegrin and metalloproteinase with thrombospondin motifs 13	ADAMTS13	153.6	142.83	10.9	13	15	13	1.36102	0.0241905
Q7KZF4	Staphylococcal nuclease domain-containing protein 1	SND1	102	60.138	10.1	9	9	9	0.346622	7.47283e-05
Q7L014	Probable ATP-dependent RNA helicase DDX46	DDX46	117.36	10.7	1.6	2	2	2	1.84205	0.0337984
Q7Z3B1	Neuronal growth regulator 1	NEGR1	38.719	23.758	9	3	4	3	1.5238	0.10383
Q7Z5L2	Coiled-coil domain-containing protein R3HCC1L	R3HCC1L	87.883	-2	1.3	1	1	1	1.45914	0.00637803
Q7Z5N4	Protein sidekick-1	SDK1	242.11	6.2126	0.6	1	1	1
Q7Z7A1	Centriolin	CNTRL	268.88	6.1736	0.4	1	1	1	1.63285	0.021294
Q7Z7G0	Target of Nesh-SH3	ABI3BP	118.64	91.381	7.4	6	8	6	1.62785	0.0134035
Q7Z7M0	Multiple epidermal growth factor-like domains protein 8	MEGF8	303.1	155.67	6	12	13	12	1.63378	0.00516996
Q7Z7M8	UDP-GlcNAc:betaGal beta-1,3-N-acetylglucosaminyltransferase 8	B3GNT8	43.395	6.4977	2.8	1	1	1
Q86SF2	N-acetylgalactosaminyltransferase 7	GALNT7	75.388	10.684	4.3	2	2	2	1.64804	0.0204178
Q86SQ4	G-protein coupled receptor 126	GPR126	136.69	52.787	5.3	5	6	5	1.49459	0.00284679
Q86TH1	ADAMTS-like protein 2	ADAMTSL2	104.62	10.994	2	2	2	2	1.52316	0.00727544
Q86U17	Serpin A11	SERPINA11	46.989	25.064	9	4	6	4	1.62568	0.0327274
Q86UD1	Out at first protein homolog	OAF	30.688	27.134	15	4	6	4	1.4762	0.0198641
Q86UE4	Protein LYRIC	MTDH	63.836	8.5726	3.1	1	1	1
Q86UN3	Reticulon-4 receptor-like 2	RTN4RL2	46.105	21.264	6	2	2	2	1.53505	0.00134785
Q86UP2	Kinectin	KTN1	156.27	12.517	2.1	2	2	2
Q86V81	THO complex subunit 4	ALYREF	26.888	28.818	12.8	2	2	2	0.981189	0.931176
Q86VB7	Scavenger receptor cysteine-rich type 1 protein M130	CD163	125.45	172.58	13.6	14	22	14	1.2969	0.354299
Q86VP6	Cullin-associated NEDD8-dissociated protein 1	CAND1	136.37	6.6996	1.1	1	1	1
Q86WI1	Fibrocystin-L	PKHD1L1	465.73	25.819	1.1	4	4	4	1.60026	0.165007
Q86YW5	Trem-like transcript 1 protein	TREML1	32.678	34.849	12.5	3	4	3	1.14808	0.654164
Q8IU80	Transmembrane protease serine 6	TMPRSS6	89.999	7.616	0.9	1	1	1
Q8IUL8	Cartilage intermediate layer protein 2	CILP2	126.29	12.883	2.2	2	2	2	1.97596	0.000938527
Q8IWV2	Contactin-4	CNTN4	113.45	19.182	2.8	3	3	3	1.58872	0.035057
Q8IXL6	Extracellular serine/threonine protein kinase FAM20C	FAM20C	66.234	12.148	3.4	2	2	2	1.39652	0.00442344
Q8IYE0	Coiled-coil domain-containing protein 146	CCDC146	112.81	-2	0.9	1	2	1	1.72353	0.0264136
Q8IZF2	Probable G-protein coupled receptor 116	GPR116	149.46	65.524	7.1	8	11	8	1.38241	0.122313
Q8N0Z3	Spindle and centriole-associated protein 1	SPICE1	96.263	6.5347	1.2	1	1	1
Q8N5M9	Protein jagunal homolog 1	JAGN1	21.125	6.4734	6.6	1	1	1	0.678641	0.126875
Q8N8Z6	Discoidin, CUB and LCCL domain-containing protein 1	DCBLD1	77.92	6.5743	2	1	1	1
Q8NBI5	Solute carrier family 43 member 3	SLC43A3	54.528	6.7101	1.8	1	1	1
Q8NBJ4	Golgi membrane protein 1	GOLM1	45.333	66.431	16.2	7	9	7	1.21755	0.342814
Q8NBP7	Proprotein convertase subtilisin/kexin type 9	PCSK9	74.285	69.095	10.8	7	10	7	1.46687	0.0403512
Q8NBS9	Thioredoxin domain-containing protein 5	TXNDC5	47.628	14.556	4.6	2	2	2	0.588549	0.000115126
Q8NC51	Plasminogen activator inhibitor 1 RNA-binding protein	SERBP1	44.965	57.287	15	5	8	5	0.289216	4.79094e-05
Q8ND56	Protein LSM14 homolog A	LSM14A	50.529	6.3702	2.8	1	1	1
Q8NEV1	Casein kinase II subunit alpha 3	CSNK2A3	45.219	10.57	6.4	2	2	2	1.68362	0.0324356
Q8NEY8	Periphilin-1	PPHLN1	52.736	5.9673	1.7	1	1	1	0.284676	0.000734807
Q8NFI4	Putative protein FAM10A5	ST13P5	41.377	14.812	6	2	2	2	0.512714	0.0230563
Q8NGE1	Olfactory receptor 6C4	OR6C4	35.01	-2	3.2	1	1	1	1.42667	0.0163415
Q8NHW5	60S acidic ribosomal protein P0-like	RPLP0P6	34.364	32.021	12.9	4	7	4	0.67367	0.00168507
Q8NI99	Angiopoietin-related protein 6	ANGPTL6	51.694	6.2617	2.1	1	1	1
Q8TDL5	BPI fold-containing family B member 1	BPIFB1	52.441	8.7791	3.5	1	1	1
Q8TE56	A disintegrin and metalloproteinase with thrombospondin motifs 17	ADAMTS17	121.13	6.2601	0.9	1	2	1	1.70655	0.011538
Q8TER0	Sushi, nidogen and EGF-like domain-containing protein 1	SNED1	152.2	18.692	1.7	2	2	2	1.82281	0.00367375
Q8WUJ3	Cell migration-inducing and hyaluronan-binding protein	CEMIP	153	6.7747	0.7	1	1	1
Q8WUM4	Programmed cell death 6-interacting protein	PDCD6IP	96.022	28.983	5.8	5	5	5	0.928405	0.542955
Q8WWZ8	Oncoprotein-induced transcript 3 protein	OIT3	60.021	20.533	5.7	3	4	3	1.16226	0.521649
Q8WZ75	Roundabout homolog 4	ROBO4	107.46	31.728	6	4	5	4	1.86543	0.0026302
Q92484	Acid sphingomyelinase-like phosphodiesterase 3a	SMPDL3A	51.26	6.3534	2	1	1	1
Q92496	Complement factor H-related protein 4	CFHR4	65.35	103.01	16.1	6	13	3	2.5011	0.299189
Q92499	ATP-dependent RNA helicase DDX1	DDX1	82.431	11.507	2.7	2	2	2
Q92520	Protein FAM3C	FAM3C	24.68	11.753	8.8	2	2	2
Q92522	Histone H1x	H1FX	22.487	18.243	7	1	1	1	0.383378	0.00364216
Q92598	Heat shock protein 105 kDa	HSPH1	96.864	53.756	10.3	7	9	7	0.653854	0.0174512
Q92688	Acidic leucine-rich nuclear phosphoprotein 32 family member B	ANP32B	28.787	22.373	13.9	3	5	2	0.179355	0.00311854
Q92769	Histone deacetylase 2	HDAC2	55.364	6.7734	3.7	1	1	1	0.179861	0.00384862
Q92804	TATA-binding protein-associated factor 2N	TAF15	61.829	13.673	10.1	3	3	2
Q92820	Gamma-glutamyl hydrolase	GGH	35.964	60.014	20.4	6	9	6	1.99686	0.00770982
Q92823	Neuronal cell adhesion molecule	NRCAM	143.89	14.625	1.8	2	2	2
Q92841	Probable ATP-dependent RNA helicase DDX17	DDX17	80.272	18.273	11.4	8	9	3	0.34733	0.0033245
Q92859	Neogenin	NEO1	160.01	72.005	7.4	10	12	10	1.57858	0.0144878
Q92922	SWI/SNF complex subunit SMARCC1	SMARCC1	122.87	12.782	1.8	2	2	1
Q92945	Far upstream element-binding protein 2	KHSRP	73.114	97.7	9	4	4	4	0.410588	0.000517988
Q92954	Proteoglycan 4	PRG4	151.06	226.72	27.7	24	38	24	1.4889	0.114004
Q92973	Transportin-1	TNPO1	102.35	11.596	2.4	2	2	2	0.538421	0.00778229
Q93063	Exostosin-2	EXT2	82.254	11.988	2.6	2	2	2	1.27152	0.0466628
Q93070	Ecto-ADP-ribosyltransferase 4	ART4	35.877	10.872	6.7	2	2	2
Q96AE4	Far upstream element-binding protein 1	FUBP1	67.56	52.56	13.5	7	8	7	0.210644	0.000449752
Q96AG4	Leucine-rich repeat-containing protein 59	LRRC59	34.93	20.536	9.1	3	3	3	0.246718	6.05469e-05
Q96C19	EF-hand domain-containing protein D2	EFHD2	26.697	14.91	9.2	2	2	2	0.322304	0.000732356
Q96C36	Pyrroline-5-carboxylate reductase 2	PYCR2	33.637	7.1164	5	1	1	1
Q96CX2	BTB/POZ domain-containing protein KCTD12	KCTD12	35.7	11.837	8.3	2	2	2	1.28402	0.142081
Q96EE4	Coiled-coil domain-containing protein 126	CCDC126	15.668	11.371	10.7	2	2	2
Q96FE7	Phosphoinositide-3-kinase-interacting protein 1	PIK3IP1	28.248	7.575	4.2	1	1	1
Q96GM5	SWI/SNF-related matrix-associated actin-dependent regulator of chromatin subfamily D member 1	SMARCD1	58.232	5.8711	1.9	1	2	1	1.66626	0.0702059
Q96IY4	Carboxypeptidase B2	CPB2	48.424	132.1	23.2	10	21	10	1.41936	0.0316419
Q96KG7	Multiple epidermal growth factor-like domains protein 10	MEGF10	122.2	20.886	2.9	3	3	3
Q96KN2	Beta-Ala-His dipeptidase	CNDP1	56.705	154.28	27	12	26	12	1.41039	0.0715386
Q96PD5	N-acetylmuramoyl-L-alanine amidase	PGLYRP2	62.216	301.25	18.8	8	30	7	1.67091	0.00530274
Q96PK6	RNA-binding protein 14	RBM14	69.491	13.243	3	2	2	2
Q96PZ0	Pseudouridylate synthase 7 homolog	PUS7	75.035	6.1907	2.1	1	1	1	1.01616	0.942594
Q96S96	Phosphatidylethanolamine-binding protein 4	PEBP4	25.733	18.669	11.9	3	3	3	1.00447	0.975201
Q99459	Cell division cycle 5-like protein	CDC5L	92.25	8.0733	1.6	1	1	1
Q99497	Protein DJ-1	PARK7	19.891	19.842	15.3	2	3	2	0.945865	0.611278
Q99584	Protein S100-A13	S100A13	11.471	20.338	28.6	3	3	3	0.396473	0.00391253
Q99590	Protein SCAF11	SCAF11	164.65	6.92	0.6	1	1	1	0.392769	0.00965854
Q99613	Eukaryotic translation initiation factor 3 subunit C	EIF3C	105.34	21.526	3.7	3	3	3
Q99623	Prohibitin-2	PHB2	33.296	26.689	13.4	4	6	4	0.304039	0.000137025
Q99650	Oncostatin-M-specific receptor subunit beta	OSMR	110.51	26.84	1.8	1	1	1	1.88586	0.00871397
Q99714	3-hydroxyacyl-CoA dehydrogenase type-2	HSD17B10	26.923	74.209	15.3	2	2	2	0.712943	0.0315378
Q99729	Heterogeneous nuclear ribonucleoprotein A/B	HNRNPAB	36.224	13.463	6	2	3	2	0.219008	0.000167325
Q99784	Noelin	OLFM1	55.342	60.328	12.2	6	8	6	1.63883	0.0425933
Q99832	T-complex protein 1 subunit eta	CCT7	59.366	21.707	6.6	3	3	3	0.697222	0.00729679
Q99848	Probable rRNA-processing protein EBP2	EBNA1BP2	34.852	12.03	7.2	1	1	1
Q99873	Protein arginine N-methyltransferase 1	PRMT1	42.461	17.047	7.8	3	3	3	0.471426	0.00223814
Q99880	Histone H2B type 1-L	HIST1H2BL	13.952	50.283	41.3	7	13	0
Q99969	Retinoic acid receptor responder protein 2	RARRES2	18.617	26.252	18.4	3	3	3	1.69025	0.00721007
Q99972	Myocilin	MYOC	56.971	24.761	7.1	4	4	4	1.96634	0.00078802
Q9BQ51	Programmed cell death 1 ligand 2	PDCD1LG2	30.957	12.509	9.2	2	2	2
Q9BQ61	Uncharacterized protein C19orf43	C19orf43	18.419	6.9518	8	1	1	1	0.331661	0.000338927
Q9BQE3	Tubulin alpha-1C chain	TUBA1C	49.895	7.2655	32.1	11	15	1	1.10421	0.42951
Q9BQG0	Myb-binding protein 1A	MYBBP1A	148.85	15.663	1.7	2	2	2	1.38108	0.10986
Q9BRQ8	Apoptosis-inducing factor 2	AIFM2	40.526	9.5882	3.8	1	1	1
Q9BS26	Endoplasmic reticulum resident protein 44	ERP44	46.971	12.072	5.4	2	2	2
Q9BTY2	Plasma alpha-L-fucosidase	FUCA2	54.066	46.485	14.1	7	8	7	1.42999	0.0439436
Q9BUJ2	Heterogeneous nuclear ribonucleoprotein U-like protein 1	HNRNPUL1	95.737	9.4414	1.6	1	1	1	0.657834	0.0181778
Q9BUN1	Protein MENT	MENT	36.769	6.8193	3.2	1	1	1
Q9BUQ8	Probable ATP-dependent RNA helicase DDX23	DDX23	95.581	7.1527	1.5	1	2	1	0.389764	0.0149952
Q9BVC6	Transmembrane protein 109	TMEM109	26.21	5.928	4.9	1	1	1	1.20297	0.54679
Q9BVK6	Transmembrane emp24 domain-containing protein 9	TMED9	27.277	6.7044	4.7	1	1	1
Q9BWJ5	Splicing factor 3B subunit 5	SF3B5	10.135	6.1927	10.5	1	1	1
Q9BWP8	Collectin-11	COLEC11	28.665	21.018	14	3	3	3	1.24891	0.243798
Q9BXJ4	Complement C1q tumor necrosis factor-related protein 3	C1QTNF3	26.994	12.358	7.7	2	2	2	1.48268	0.0585627
Q9BXN1	Asporin	ASPN	43.417	6.2703	2.1	1	1	1
Q9BXP5	Serrate RNA effector molecule homolog	SRRT	100.67	25.816	5	4	6	4	0.981449	0.913493
Q9BXR6	Complement factor H-related protein 5	CFHR5	64.419	200.71	29.2	14	22	13	1.98146	0.0799865
Q9BY43	Charged multivesicular body protein 4a	CHMP4A	25.098	6.1374	3.2	1	2	1	1.09128	0.629909
Q9BY67	Cell adhesion molecule 1	CADM1	48.509	30.193	5	2	3	2
Q9BYD3	39S ribosomal protein L4, mitochondrial	MRPL4	34.919	6.7201	5.1	1	1	1
Q9BYG3	MKI67 FHA domain-interacting nucleolar phosphoprotein	NIFK	34.222	14.09	10.6	2	2	2
Q9BYJ0	Fibroblast growth factor-binding protein 2	FGFBP2	24.581	35.721	4.9	1	1	1
Q9BYX2	TBC1 domain family member 2A	TBC1D2	105.41	5.866	0.9	1	3	1	1.75307	0.00583625
Q9BZZ5	Apoptosis inhibitor 5	API5	59.004	17.74	7.3	3	3	3
Q9GZP8	Immortalization up-regulated protein	IMUP	10.897	10.575	9.4	1	1	1
Q9GZT3	SRA stem-loop-interacting RNA-binding protein, mitochondrial	SLIRP	12.349	10.344	12.8	1	1	1	0.502363	0.000268631
Q9GZV4	Eukaryotic translation initiation factor 5A-2	EIF5A2	16.793	6.1255	5.2	1	1	1	0.351956	0.000523415
Q9H0C2	ADP/ATP translocase 4	SLC25A31	35.021	14.411	4.1	1	2	1	1.18242	0.649657
Q9H1U4	Multiple epidermal growth factor-like domains protein 9	MEGF9	62.983	58.574	7.3	3	3	3
Q9H299	SH3 domain-binding glutamic acid-rich-like protein 3	SH3BGRL3	10.438	7.8825	8.6	1	1	1	1.27268	0.378643
Q9H3P7	Golgi resident protein GCP60	ACBD3	60.593	8.7196	3	1	1	1	0.72196	0.138126
Q9H4A4	Aminopeptidase B	RNPEP	72.595	7.9908	1.7	1	1	1
Q9H4A6	Golgi phosphoprotein 3	GOLPH3	33.81	6.2622	4.4	1	1	1
Q9H4A9	Dipeptidase 2	DPEP2	53.364	54.959	13	5	7	5	1.42275	0.095814
Q9H4G4	Golgi-associated plant pathogenesis-related protein 1	GLIPR2	17.218	53.539	33.1	4	4	4	1.33321	0.0104995
Q9H4M9	EH domain-containing protein 1	EHD1	60.626	11.865	4.3	2	2	2	1.25769	0.0811534
Q9H6X2	Anthrax toxin receptor 1	ANTXR1	62.788	10.585	3.2	2	2	2
Q9H8L6	Multimerin-2	MMRN2	104.41	6.5907	0.9	1	2	1
Q9HB71	Calcyclin-binding protein	CACYBP	26.21	26.733	8.8	1	1	1
Q9HBB8	Cadherin-related family member 5	CDHR5	88.222	23.086	3.3	2	2	2	1.24568	0.225971
Q9HBR0	Putative sodium-coupled neutral amino acid transporter 10	SLC38A10	119.76	40.96	6.4	6	6	6	1.17213	0.268087
Q9HCB6	Spondin-1	SPON1	90.973	11.216	2.4	2	2	2	1.73477	0.0580684
Q9HCD6	Protein TANC2	TANC2	219.65	-2	0.4	1	1	1
Q9HCL0	Protocadherin-18	PCDH18	126.15	14.707	1.8	2	3	2	1.52629	0.04672
Q9HCN6	Platelet glycoprotein VI	GP6	36.866	15.047	7.1	2	2	2	1.19753	0.142948
Q9HCU0	Endosialin	CD248	80.858	22.127	3.2	2	2	2	1.59473	0.0330277
Q9HDC9	Adipocyte plasma membrane-associated protein	APMAP	46.48	70.459	20.4	9	12	9	1.02086	0.869028
Q9NP72	Ras-related protein Rab-18	RAB18	22.977	6.108	7.3	1	1	1
Q9NPG4	Protocadherin-12	PCDH12	128.99	10.773	1.6	2	2	2	1.47054	0.0519192
Q9NPH3	Interleukin-1 receptor accessory protein	IL1RAP	65.418	62.54	12.1	8	11	8	1.38047	0.0715106
Q9NPJ4	Proline-rich nuclear receptor coactivator 2	PNRC2	15.59	6.3574	12.9	1	1	1	1.25088	0.0209859
Q9NPR2	Semaphorin-4B	SEMA4B	92.192	20.613	4.2	3	4	3	1.42771	0.143876
Q9NPY3	Complement component C1q receptor	CD93	68.559	74.254	14.9	6	7	6	1.53454	0.067384
Q9NQ79	Cartilage acidic protein 1	CRTAC1	71.42	190.81	25.4	13	18	13	1.86396	0.0470656
Q9NR30	Nucleolar RNA helicase 2	DDX21	87.343	59.847	10.6	8	9	8	0.285347	0.00017749
Q9NRW1	Ras-related protein Rab-6B	RAB6B	23.461	6.7572	5.3	1	2	1	1.04147	0.67378
Q9NS71	Gastrokine-1	GKN1	21.999	6.7348	7	1	1	1	1.91626	0.00783956
Q9NTJ3	Structural maintenance of chromosomes protein 4	SMC4	147.18	6.7572	0.9	1	1	1
Q9NTK5	Obg-like ATPase 1	OLA1	44.743	6.3956	2.3	1	1	1
Q9NTU7	Cerebellin-4	CBLN4	21.808	31.016	7	1	2	1
Q9NUP9	Protein lin-7 homolog C	LIN7C	21.834	6.0199	6.6	1	1	1
Q9NUU7	ATP-dependent RNA helicase DDX19A	DDX19A	53.974	6.8564	3.1	1	1	1
Q9NVE4	Coiled-coil domain-containing protein 87	CCDC87	96.401	6.463	1.4	1	1	1
Q9NVP1	ATP-dependent RNA helicase DDX18	DDX18	75.406	7.1813	1.8	1	1	1
Q9NW08	DNA-directed RNA polymerase III subunit RPC2	POLR3B	127.78	6.4868	1.1	1	1	1	1.71249	0.0150077
Q9NXL9	DNA helicase MCM9	MCM9	127.31	-2	1	1	1	1
Q9NY15	Stabilin-1	STAB1	275.48	22.954	1.1	2	2	2	1.89794	0.0856556
Q9NY97	UDP-GlcNAc:betaGal beta-1,3-N-acetylglucosaminyltransferase 2	B3GNT2	46.021	16.562	7.3	2	2	2
Q9NYL9	Tropomodulin-3	TMOD3	39.594	6.1504	5.4	1	1	1
Q9NZ08	Endoplasmic reticulum aminopeptidase 1	ERAP1	107.23	28.605	5.3	4	4	4	1.36457	0.0675157
Q9NZ45	CDGSH iron-sulfur domain-containing protein 1	CISD1	12.199	15.684	13.9	1	1	1	0.692086	0.0357349
Q9NZD4	Alpha-hemoglobin-stabilizing protein	AHSP	11.84	7.3636	12.7	1	1	1
Q9NZK5	Adenosine deaminase CECR1	CECR1	58.933	37.704	10.8	5	6	5	1.59619	0.114427
Q9NZM1	Myoferlin	MYOF	234.71	24.277	2.3	4	5	4	0.299152	0.000545299
Q9NZP8	Complement C1r subcomponent-like protein	C1RL	53.498	154.66	22.6	11	21	10	1.55696	0.023694
Q9NZT1	Calmodulin-like protein 5	CALML5	15.892	6.0853	5.5	1	1	1	2.13119	0.0201941
Q9P035	Very-long-chain (3R)-3-hydroxyacyl-CoA dehydratase 3	PTPLAD1	43.159	6.4348	3.9	1	1	1	0.541691	0.00262769
Q9P0L0	Vesicle-associated membrane protein-associated protein A	VAPA	27.893	18.823	14.9	3	3	3	0.395853	0.000669771
Q9P121	Neurotrimin	NTM	37.971	6.0742	2.3	1	1	1	1.52819	0.0393481
Q9P232	Contactin-3	CNTN3	112.88	21.122	3.1	3	3	3	1.30408	0.0630527
Q9P258	Protein RCC2	RCC2	56.084	36.246	10	4	4	4	0.977732	0.727486
Q9P2E2	Kinesin-like protein KIF17	KIF17	115.07	7.5491	1	1	2	1	1.49387	0.362974
Q9P2E9	Ribosome-binding protein 1	RRBP1	152.47	53.978	17	8	8	8	0.360574	0.00353459
Q9P2R7	Succinyl-CoA ligase [ADP-forming] subunit beta, mitochondrial	SUCLA2	50.317	7.0547	2.8	1	1	1	1.04472	0.828971
Q9UBG0	C-type mannose receptor 2	MRC2	166.67	32.957	3	3	3	3	1.61321	0.0199053
Q9UBG3	Cornulin	CRNN	53.533	16.65	2.8	1	1	1	12.688	0.524717
Q9UBI6	Guanine nucleotide-binding protein G(I)/G(S)/G(O) subunit gamma-12	GNG12	8.0061	16.077	37.5	2	2	2	0.395387	0.000234032
Q9UBP4	Dickkopf-related protein 3	DKK3	38.39	15.291	9.4	2	2	2	1.16376	0.71322
Q9UBQ6	Exostosin-like 2	EXTL2	37.465	16.027	7.6	3	3	3	1.51757	0.0431239
Q9UBR2	Cathepsin Z	CTSZ	33.868	27.357	12.9	4	4	4	1.61799	0.0139433
Q9UBX1	Cathepsin F	CTSF	53.365	16.843	5.4	3	3	3	1.58734	0.14959
Q9UEW3	Macrophage receptor MARCO	MARCO	52.657	16.353	3.5	2	4	2	1.25954	0.232855
Q9UGM5	Fetuin-B	FETUB	42.054	203.98	28	10	30	10	1.40198	0.0170655
Q9UHB9	Signal recognition particle subunit SRP68	SRP68	70.729	35.926	6.2	2	2	2	0.566278	0.169331
Q9UHD1	Cysteine and histidine-rich domain-containing protein 1	CHORDC1	37.489	19.059	9	2	2	2	0.746804	0.182211
Q9UHG3	Prenylcysteine oxidase 1	PCYOX1	56.639	120.11	25.9	11	19	11	1.22243	0.0898911
Q9UHX1	Poly(U)-binding-splicing factor PUF60	PUF60	59.875	7.0682	2.9	1	1	1
Q9UII2	ATPase inhibitor, mitochondrial	ATPIF1	12.249	12.04	17	2	2	2	0.405041	0.0151804
Q9UJJ9	N-acetylglucosamine-1-phosphotransferase subunit gamma	GNPTG	33.973	46.594	15.4	4	5	4	1.22878	0.181916
Q9UJS0	Calcium-binding mitochondrial carrier protein Aralar2	SLC25A13	74.175	6.7677	1.9	1	1	1
Q9UJZ1	Stomatin-like protein 2, mitochondrial	STOML2	38.534	7.5325	2.8	1	1	1
Q9UK55	Protein Z-dependent protease inhibitor	SERPINA10	50.706	75	21.6	10	17	10	1.55632	0.00867901
Q9UK76	Hematological and neurological expressed 1 protein	HN1	16.014	12.249	11.7	1	1	1	0.657997	0.0717656
Q9UKM9	RNA-binding protein Raly	RALY	32.463	23.989	12.1	4	4	4
Q9UKV3	Apoptotic chromatin condensation inducer in the nucleus	ACIN1	151.86	12.985	2.6	2	2	2
Q9UL25	Ras-related protein Rab-21	RAB21	24.347	5.9001	4.4	1	1	1
Q9ULI3	Protein HEG homolog 1	HEG1	147.46	77.604	3.8	4	5	4	1.39099	0.145743
Q9ULV4	Coronin-1C	CORO1C	53.248	20.888	7	3	5	3	0.376017	0.00283909
Q9UM47	Neurogenic locus notch homolog protein 3	NOTCH3	243.63	41.789	2.9	5	7	5	1.33242	0.265642
Q9UMX0	Ubiquilin-1	UBQLN1	62.518	13.107	5.3	2	2	2
Q9UMX5	Neudesin	NENF	18.856	19.148	20.9	3	3	3	0.950236	0.745015
Q9UNF1	Melanoma-associated antigen D2	MAGED2	64.953	11.791	3	2	2	2
Q9UNL2	Translocon-associated protein subunit gamma	SSR3	21.08	7.6507	7.6	1	1	1
Q9UNM6	26S proteasome non-ATPase regulatory subunit 13	PSMD13	42.945	11.222	6.1	2	2	2	0.374884	8.71954e-05
Q9UNN8	Endothelial protein C receptor	PROCR	26.671	14.421	8.8	2	5	2
Q9UNW1	Multiple inositol polyphosphate phosphatase 1	MINPP1	55.051	85.945	18.1	8	14	8	1.39379	0.0281402
Q9UNX3	60S ribosomal protein L26-like 1	RPL26L1	17.256	6.0426	5.5	1	1	1	0.441859	0.00191427
Q9UQ80	Proliferation-associated protein 2G4	PA2G4	43.786	45.937	14.5	5	7	5	0.50196	0.00161404
Q9Y262	Eukaryotic translation initiation factor 3 subunit L	EIF3L	66.726	8.0398	2.8	1	1	1	0.525685	0.176847
Q9Y265	RuvB-like 1	RUVBL1	50.227	16.183	4.8	2	3	2	0.303904	0.00157356
Q9Y266	Nuclear migration protein nudC	NUDC	38.242	28.601	13	4	4	4	0.483975	0.0111496
Q9Y277	Voltage-dependent anion-selective channel protein 3	VDAC3	30.658	6.8291	4.6	1	1	1	0.222129	0.000284872
Q9Y2X3	Nucleolar protein 58	NOP58	59.578	21.672	5.3	2	3	2
Q9Y383	Putative RNA-binding protein Luc7-like 2	LUC7L2	46.513	24.257	6.4	2	2	2	0.548971	0.000947561
Q9Y3F4	Serine-threonine kinase receptor-associated protein	STRAP	38.438	16.879	9.7	3	4	3	0.534178	0.00290365
Q9Y3I0	tRNA-splicing ligase RtcB homolog	RTCB	55.21	7.4769	2	1	1	1	0.173455	8.6662e-05
Q9Y490	Talin-1	TLN1	269.76	13.3	1.1	2	2	2
Q9Y4D7	Plexin-D1	PLXND1	212	14.893	1.6	2	2	2	1.58608	0.0214135
Q9Y4L1	Hypoxia up-regulated protein 1	HYOU1	111.33	64.753	8.9	8	9	8	1.51145	0.0121791
Q9Y5C1	Angiopoietin-related protein 3	ANGPTL3	53.637	44.125	9.1	4	5	4	1.5355	0.0811202
Q9Y5K5	Ubiquitin carboxyl-terminal hydrolase isozyme L5	UCHL5	37.606	6.2446	4.3	1	1	1
Q9Y5L4	Mitochondrial import inner membrane translocase subunit Tim13	TIMM13	10.5	5.9701	11.6	1	1	1
Q9Y5M8	Signal recognition particle receptor subunit beta	SRPRB	29.702	14.696	7.7	2	2	2	0.83276	0.242988
Q9Y5S9	RNA-binding protein 8A	RBM8A	19.889	11.914	9.8	2	2	2
Q9Y5U9	Immediate early response 3-interacting protein 1	IER3IP1	8.9687	8.4524	24.4	1	1	1
Q9Y5Y7	Lymphatic vessel endothelial hyaluronic acid receptor 1	LYVE1	35.213	35.539	12.4	5	5	5	1.41349	0.0161456
Q9Y617	Phosphoserine aminotransferase	PSAT1	40.422	6.1132	2.7	1	1	1
Q9Y6H1	Coiled-coil-helix-coiled-coil-helix domain-containing protein 2, mitochondrial	CHCHD2	15.512	38.577	31.1	3	3	3	0.84362	0.459974
Q9Y6R7	IgGFc-binding protein	FCGBP	572.01	121.53	6	15	15	15	1.3837	0.216235
Q9Y6Z7	Collectin-10	COLEC10	30.705	47.877	20.2	6	7	6	1.49624	0.00348384
