# Supplementary material for: Serum proteomic analysis of differentially expressed proteins and pathways involved in the mechanism of endemic osteoarthritis
Source: Royal Society of Chemistry journal article supplement (doi:10.1039/d2mo00154c), 2022-06-29
Supplement: d2mo00154c3.pdf [file d2mo00154c3.pdf]

**Table S3. MS/MS spectrum database search analysis summary**

| <b>Total spectrum</b> | <b>Matched spetrums</b> | <b>Peptides</b> | <b>Unique peptides</b> | <b>Identified proteins</b> | <b>Quantifiable proteins</b> |
|-----------------------|-------------------------|-----------------|------------------------|----------------------------|------------------------------|
| <b>324149</b>         | <b>21541</b>            | <b>6824</b>     | <b>6558</b>            | <b>1305</b>                | <b>940</b>                   |
