# Supplementary material for: Serum proteomic analysis of differentially expressed proteins and pathways involved in the mechanism of endemic osteoarthritis
Source: Royal Society of Chemistry journal article supplement (doi:10.1039/d2mo00154c), 2022-06-29
Supplement: d2mo00154c4.xlsx [file d2mo00154c4.xlsx]

## Sheet: Sheet1
Protein accession	Protein description	Gene name	Ratio	Regulated Type	P-value
P25205	DNA replication licensing factor MCM3	MCM3	0.052	Down	0.000632
P50914	60S ribosomal protein L14	RPL14	0.083	Down	0.000818
P23588	Eukaryotic translation initiation factor 4B	EIF4B	0.099	Down	0.000545
Q07955	Serine/arginine-rich splicing factor 1	SRSF1	0.101	Down	0.000488
P07910	Heterogeneous nuclear ribonucleoproteins C1/C2	HNRNPC	0.103	Down	0.00021
P46777	60S ribosomal protein L5	RPL5	0.105	Down	0.000256
P61247	40S ribosomal protein S3a	RPS3A	0.110	Down	1.58e-05
P18621	60S ribosomal protein L17	RPL17	0.112	Down	7.68e-06
P46779	60S ribosomal protein L28	RPL28	0.115	Down	1.95e-05
Q14978	Nucleolar and coiled-body phosphoprotein 1	NOLC1	0.120	Down	0.000202
P26599	Polypyrimidine tract-binding protein 1	PTBP1	0.122	Down	0.000133
Q16629	Serine/arginine-rich splicing factor 7	SRSF7	0.123	Down	0.000125
P39023	60S ribosomal protein L3	RPL3	0.126	Down	1.86e-05
P60903	Protein S100-A10	S100A10	0.137	Down	0.000105
P0DP25	Calmodulin-3	CALM1	0.160	Down	3.05e-05
P62750	60S ribosomal protein L23a	RPL23A	0.161	Down	1.46e-05
Q9Y3I0	tRNA-splicing ligase RtcB homolog	RTCB	0.173	Down	8.67e-05
P16402	Histone H1.3	HIST1H1D	0.178	Down	0.000695
Q92688	Acidic leucine-rich nuclear phosphoprotein 32 family member B	ANP32B	0.179	Down	0.00312
Q92769	Histone deacetylase 2	HDAC2	0.180	Down	0.00385
P46776	60S ribosomal protein L27a	RPL27A	0.182	Down	3.95e-05
P49458	Signal recognition particle 9 kDa protein	SRP9	0.185	Down	0.000469
P62826	GTP-binding nuclear protein Ran	RAN	0.186	Down	4.34e-06
O94826	Mitochondrial import receptor subunit TOM70	TOMM70A	0.199	Down	0.000473
P62280	40S ribosomal protein S11	RPS11	0.204	Down	1.94e-05
P40926	"Malate dehydrogenase, mitochondrial"	MDH2	0.205	Down	0.00018
Q96AE4	Far upstream element-binding protein 1	FUBP1	0.211	Down	0.00045
P05387	60S acidic ribosomal protein P2	RPLP2	0.216	Down	9.2e-05
Q14103	Heterogeneous nuclear ribonucleoprotein D0	HNRNPD	0.216	Down	0.00116
Q12905	Interleukin enhancer-binding factor 2	ILF2	0.217	Down	0.00153
P30040	Endoplasmic reticulum resident protein 29	ERP29	0.218	Down	9.67e-05
Q99729	Heterogeneous nuclear ribonucleoprotein A/B	HNRNPAB	0.219	Down	0.000167
Q9Y277	Voltage-dependent anion-selective channel protein 3	VDAC3	0.222	Down	0.000285
P18077	60S ribosomal protein L35a	RPL35A	0.227	Down	3.86e-06
P11387	DNA topoisomerase 1	TOP1	0.236	Down	0.00186
P40227	T-complex protein 1 subunit zeta	CCT6A	0.236	Down	0.000158
P32969	60S ribosomal protein L9	RPL9	0.238	Down	0.000316
O60361	Putative nucleoside diphosphate kinase	NME2P1	0.239	Down	2.42e-05
P16401	Histone H1.5	HIST1H1B	0.241	Down	5.37e-05
P62805	Histone H4	HIST1H4A	0.241	Down	0.000282
P62910	60S ribosomal protein L32	RPL32	0.242	Down	0.000843
O75531	Barrier-to-autointegration factor	BANF1	0.246	Down	5.51e-05
P26641	Elongation factor 1-gamma	EEF1G	0.246	Down	0.000179
Q6P2Q9	Pre-mRNA-processing-splicing factor 8	PRPF8	0.246	Down	0.00496
Q96AG4	Leucine-rich repeat-containing protein 59	LRRC59	0.247	Down	6.05e-05
P21796	Voltage-dependent anion-selective channel protein 1	VDAC1	0.248	Down	4.7e-05
P16403	Histone H1.2	HIST1H1C	0.249	Down	4.02e-05
P19338	Nucleolin	NCL	0.251	Down	0.000401
P51991	Heterogeneous nuclear ribonucleoprotein A3	HNRNPA3	0.252	Down	5.1e-05
P17844	Probable ATP-dependent RNA helicase DDX5	DDX5	0.258	Down	0.00118
P62244	40S ribosomal protein S15a	RPS15A	0.260	Down	3.91e-05
P62081	40S ribosomal protein S7	RPS7	0.262	Down	1.83e-05
P31040	"Succinate dehydrogenase [ubiquinone] flavoprotein subunit, mitochondrial"	SDHA	0.265	Down	0.00134
P50990	T-complex protein 1 subunit theta	CCT8	0.266	Down	0.000291
P62701	"40S ribosomal protein S4, X isoform"	RPS4X	0.266	Down	0.000212
O00299	Chloride intracellular channel protein 1	CLIC1	0.267	Down	0.000527
P51149	Ras-related protein Rab-7a	RAB7A	0.267	Down	0.00117
P13010	X-ray repair cross-complementing protein 5	XRCC5	0.270	Down	0.000691
P26373	60S ribosomal protein L13	RPL13	0.271	Down	1.37e-05
P04843	Dolichyl-diphosphooligosaccharide--protein glycosyltransferase subunit 1	RPN1	0.273	Down	0.00222
P55084	"Trifunctional enzyme subunit beta, mitochondrial"	HADHB	0.276	Down	0.00183
P83881	60S ribosomal protein L36a	RPL36A	0.281	Down	3.9e-05
Q04837	"Single-stranded DNA-binding protein, mitochondrial"	SSBP1	0.281	Down	0.00265
O95816	BAG family molecular chaperone regulator 2	BAG2	0.283	Down	0.000511
P27824	Calnexin	CANX	0.283	Down	0.000227
P42765	"3-ketoacyl-CoA thiolase, mitochondrial"	ACAA2	0.283	Down	0.00405
Q02878	60S ribosomal protein L6	RPL6	0.283	Down	1.15e-05
P50991	T-complex protein 1 subunit delta	CCT4	0.284	Down	8.12e-05
Q8NEY8	Periphilin-1	PPHLN1	0.285	Down	0.000735
Q9NR30	Nucleolar RNA helicase 2	DDX21	0.285	Down	0.000177
P09382	Galectin-1	LGALS1	0.287	Down	0.000174
P15880	40S ribosomal protein S2	RPS2	0.287	Down	0.0047
Q00839	Heterogeneous nuclear ribonucleoprotein U	HNRNPU	0.287	Down	0.000462
Q14444	Caprin-1	CAPRIN1	0.288	Down	6.44e-05
Q8NC51	Plasminogen activator inhibitor 1 RNA-binding protein	SERBP1	0.289	Down	4.79e-05
P63244	Guanine nucleotide-binding protein subunit beta-2-like 1	GNB2L1	0.290	Down	3.17e-05
P67809	Nuclease-sensitive element-binding protein 1	YBX1	0.293	Down	5.14e-06
P62241	40S ribosomal protein S8	RPS8	0.294	Down	0.000145
P51858	Hepatoma-derived growth factor	HDGF	0.298	Down	3.29e-05
Q9NZM1	Myoferlin	MYOF	0.299	Down	0.000545
P35613	Basigin	BSG	0.300	Down	0.00991
P39019	40S ribosomal protein S19	RPS19	0.301	Down	0.000183
P08670	Vimentin	VIM	0.304	Down	0.000198
Q99623	Prohibitin-2	PHB2	0.304	Down	0.000137
Q9Y265	RuvB-like 1	RUVBL1	0.304	Down	0.00157
Q07020	60S ribosomal protein L18	RPL18	0.305	Down	6.83e-05
Q13428	Treacle protein	TCOF1	0.306	Down	0.00182
Q5VTE0	Putative elongation factor 1-alpha-like 3	EEF1A1P5	0.306	Down	0.00023
O14979	Heterogeneous nuclear ribonucleoprotein D-like	HNRNPDL	0.309	Down	0.00025
Q07666	"KH domain-containing, RNA-binding, signal transduction-associated protein 1"	KHDRBS1	0.309	Down	0.00197
Q71DI3	Histone H3.2	HIST2H3A	0.309	Down	2.13e-05
P35659	Protein DEK	DEK	0.312	Down	0.00144
P51571	Translocon-associated protein subunit delta	SSR4	0.320	Down	0.00137
Q96C19	EF-hand domain-containing protein D2	EFHD2	0.322	Down	0.000732
O76021	Ribosomal L1 domain-containing protein 1	RSL1D1	0.323	Down	0.00083
P21291	Cysteine and glycine-rich protein 1	CSRP1	0.325	Down	0.000142
P25398	40S ribosomal protein S12	RPS12	0.325	Down	3.29e-05
P38570	Integrin alpha-E	ITGAE	0.325	Down	0.00294
P49207	60S ribosomal protein L34	RPL34	0.328	Down	0.00466
P80723	Brain acid soluble protein 1	BASP1	0.329	Down	0.000466
P23246	"Splicing factor, proline- and glutamine-rich"	SFPQ	0.330	Down	0.00122
P63267	"Actin, gamma-enteric smooth muscle"	ACTG2	0.331	Down	0.000574
O60506	Heterogeneous nuclear ribonucleoprotein Q	SYNCRIP	0.332	Down	3.62e-05
P08133	Annexin A6	ANXA6	0.332	Down	0.000879
P37802	Transgelin-2	TAGLN2	0.332	Down	0.00108
P38159	"RNA-binding motif protein, X chromosome"	RBMX	0.332	Down	0.000297
Q9BQ61	Uncharacterized protein C19orf43	C19orf43	0.332	Down	0.000339
O00231	26S proteasome non-ATPase regulatory subunit 11	PSMD11	0.337	Down	0.00101
P23284	Peptidyl-prolyl cis-trans isomerase B	PPIB	0.338	Down	0.000608
P52292	Importin subunit alpha-1	KPNA2	0.338	Down	0.00154
P55209	Nucleosome assembly protein 1-like 1	NAP1L1	0.340	Down	0.0319
P22626	Heterogeneous nuclear ribonucleoproteins A2/B1	HNRNPA2B1	0.341	Down	7.48e-05
P23396	40S ribosomal protein S3	RPS3	0.341	Down	1.24e-05
P00966	Argininosuccinate synthase	ASS1	0.342	Down	0.000214
P42704	"Leucine-rich PPR motif-containing protein, mitochondrial"	LRPPRC	0.342	Down	0.000289
Q7KZF4	Staphylococcal nuclease domain-containing protein 1	SND1	0.347	Down	7.47e-05
Q92841	Probable ATP-dependent RNA helicase DDX17	DDX17	0.347	Down	0.00332
P11142	Heat shock cognate 71 kDa protein	HSPA8	0.348	Down	0.000421
P31327	"Carbamoyl-phosphate synthase [ammonia], mitochondrial"	CPS1	0.352	Down	0.000487
Q9GZV4	Eukaryotic translation initiation factor 5A-2	EIF5A2	0.352	Down	0.000523
Q01105	Protein SET	SET	0.357	Down	0.000692
P02545	Prelamin-A/C	LMNA	0.358	Down	0.000882
Q9P2E9	Ribosome-binding protein 1	RRBP1	0.361	Down	0.00353
O14980	Exportin-1	XPO1	0.364	Down	0.000178
P05114	Non-histone chromosomal protein HMG-14	HMGN1	0.368	Down	0.000264
P30048	"Thioredoxin-dependent peroxide reductase, mitochondrial"	PRDX3	0.368	Down	0.000607
P17980	26S protease regulatory subunit 6A	PSMC3	0.370	Down	0.000204
P55263	Adenosine kinase	ADK	0.370	Down	0.00566
P20042	Eukaryotic translation initiation factor 2 subunit 2	EIF2S2	0.374	Down	0.000191
P31948	Stress-induced-phosphoprotein 1	STIP1	0.374	Down	0.000409
Q9UNM6	26S proteasome non-ATPase regulatory subunit 13	PSMD13	0.375	Down	8.72e-05
Q9ULV4	Coronin-1C	CORO1C	0.376	Down	0.00284
P05783	"Keratin, type I cytoskeletal 18"	KRT18	0.377	Down	0.000105
P62841	40S ribosomal protein S15	RPS15	0.378	Down	0.00383
P05455	Lupus La protein	SSB	0.379	Down	0.00664
P38919	Eukaryotic initiation factor 4A-III	EIF4A3	0.380	Down	0.0474
P48047	"ATP synthase subunit O, mitochondrial"	ATP5O	0.380	Down	5.11e-05
P83731	60S ribosomal protein L24	RPL24	0.383	Down	8.36e-05
Q92522	Histone H1x	H1FX	0.383	Down	0.00364
P62829	60S ribosomal protein L23	RPL23	0.384	Down	4.21e-05
P62937	Peptidyl-prolyl cis-trans isomerase A	PPIA	0.384	Down	0.000673
Q12906	Interleukin enhancer-binding factor 3	ILF3	0.388	Down	0.00163
P07355	Annexin A2	ANXA2	0.389	Down	6.43e-05
P10809	"60 kDa heat shock protein, mitochondrial"	HSPD1	0.389	Down	0.000289
P09874	Poly [ADP-ribose] polymerase 1	PARP1	0.390	Down	0.000299
Q9BUQ8	Probable ATP-dependent RNA helicase DDX23	DDX23	0.390	Down	0.015
P05187	"Alkaline phosphatase, placental type"	ALPP	0.393	Down	0.000812
Q99590	Protein SCAF11	SCAF11	0.393	Down	0.00966
O15372	Eukaryotic translation initiation factor 3 subunit H	EIF3H	0.394	Down	0.000451
P49368	T-complex protein 1 subunit gamma	CCT3	0.394	Down	0.000252
P43243	Matrin-3	MATR3	0.395	Down	0.00225
Q9UBI6	Guanine nucleotide-binding protein G(I)/G(S)/G(O) subunit gamma-12	GNG12	0.395	Down	0.000234
P04083	Annexin A1	ANXA1	0.396	Down	0.013
P06733	Alpha-enolase	ENO1	0.396	Down	0.000228
Q99584	Protein S100-A13	S100A13	0.396	Down	0.00391
Q9P0L0	Vesicle-associated membrane protein-associated protein A	VAPA	0.396	Down	0.00067
P61803	Dolichyl-diphosphooligosaccharide--protein glycosyltransferase subunit DAD1	DAD1	0.397	Down	0.000482
Q13442	28 kDa heat- and acid-stable phosphoprotein	PDAP1	0.400	Down	0.00158
P30044	"Peroxiredoxin-5, mitochondrial"	PRDX5	0.401	Down	0.000555
Q71UI9	Histone H2A.V	H2AFV	0.402	Down	0.00117
Q16643	Drebrin	DBN1	0.404	Down	0.00309
Q9UII2	"ATPase inhibitor, mitochondrial"	ATPIF1	0.405	Down	0.0152
P63010	AP-2 complex subunit beta	AP2B1	0.406	Down	0.000551
P27816	Microtubule-associated protein 4	MAP4	0.407	Down	0.00332
P52597	Heterogeneous nuclear ribonucleoprotein F	HNRNPF	0.408	Down	0.00719
Q01650	Large neutral amino acids transporter small subunit 1	SLC7A5	0.411	Down	0.000559
Q92945	Far upstream element-binding protein 2	KHSRP	0.411	Down	0.000518
P63104	14-3-3 protein zeta/delta	YWHAZ	0.412	Down	7.29e-06
P48643	T-complex protein 1 subunit epsilon	CCT5	0.413	Down	0.000116
P99999	Cytochrome c	CYCS	0.414	Down	0.00343
P49736	DNA replication licensing factor MCM2	MCM2	0.424	Down	0.00461
P62424	60S ribosomal protein L7a	RPL7A	0.425	Down	0.000132
Q08211	ATP-dependent RNA helicase A	DHX9	0.427	Down	0.000915
Q15046	Lysine--tRNA ligase	KARS	0.427	Down	0.00119
P18124	60S ribosomal protein L7	RPL7	0.428	Down	0.000824
P45880	Voltage-dependent anion-selective channel protein 2	VDAC2	0.430	Down	0.00321
P62753	40S ribosomal protein S6	RPS6	0.430	Down	2.44e-06
P10412	Histone H1.4	HIST1H1E	0.435	Down	0.00116
P20700	Lamin-B1	LMNB1	0.435	Down	0.00212
O43707	Alpha-actinin-4	ACTN4	0.436	Down	0.000466
P46778	60S ribosomal protein L21	RPL21	0.437	Down	0.00213
P46087	Probable 28S rRNA (cytosine(4447)-C(5))-methyltransferase	NOP2	0.439	Down	0.00388
P62316	Small nuclear ribonucleoprotein Sm D2	SNRPD2	0.442	Down	0.00628
Q9UNX3	60S ribosomal protein L26-like 1	RPL26L1	0.442	Down	0.00191
Q15008	26S proteasome non-ATPase regulatory subunit 6	PSMD6	0.443	Down	0.00032
Q15424	Scaffold attachment factor B1	SAFB	0.443	Down	0.0103
P61604	"10 kDa heat shock protein, mitochondrial"	HSPE1	0.445	Down	0.00011
P52272	Heterogeneous nuclear ribonucleoprotein M	HNRNPM	0.448	Down	0.00112
P61026	Ras-related protein Rab-10	RAB10	0.449	Down	0.000832
P56385	"ATP synthase subunit e, mitochondrial"	ATP5I	0.454	Down	0.00621
P13639	Elongation factor 2	EEF2	0.456	Down	0.000535
P20618	Proteasome subunit beta type-1	PSMB1	0.456	Down	0.00282
Q6NZI2	Polymerase I and transcript release factor	PTRF	0.457	Down	0.0166
P08758	Annexin A5	ANXA5	0.458	Down	0.0011
P08621	U1 small nuclear ribonucleoprotein 70 kDa	SNRNP70	0.460	Down	0.00539
P62258	14-3-3 protein epsilon	YWHAE	0.462	Down	0.000618
Q14847	LIM and SH3 domain protein 1	LASP1	0.462	Down	0.00373
P12004	Proliferating cell nuclear antigen	PCNA	0.464	Down	0.0085
P49792	E3 SUMO-protein ligase RanBP2	RANBP2	0.471	Down	0.00176
Q99873	Protein arginine N-methyltransferase 1	PRMT1	0.471	Down	0.00224
P01871	Ig mu chain C region	IGHM	0.475	Down	0.0112
Q13185	Chromobox protein homolog 3	CBX3	0.477	Down	0.00271
P55072	Transitional endoplasmic reticulum ATPase	VCP	0.480	Down	0.00266
P15559	NAD(P)H dehydrogenase [quinone] 1	NQO1	0.484	Down	0.00649
P68366	Tubulin alpha-4A chain	TUBA4A	0.484	Down	0.000315
Q9Y266	Nuclear migration protein nudC	NUDC	0.484	Down	0.0111
P07108	Acyl-CoA-binding protein	DBI	0.485	Down	0.00555
Q15233	Non-POU domain-containing octamer-binding protein	NONO	0.488	Down	0.00147
P06748	Nucleophosmin	NPM1	0.491	Down	0.00123
P23528	Cofilin-1	CFL1	0.492	Down	0.00258
P38646	"Stress-70 protein, mitochondrial"	HSPA9	0.492	Down	0.00239
P15311	Ezrin	EZR	0.499	Down	0.00156
P40429	60S ribosomal protein L13a	RPL13A	0.499	Down	0.0114
P08603	Complement factor H	CFH	2.022	Up	0.0376
P08123	Collagen alpha-2(I) chain	COL1A2	2.067	Up	0.0413
P35443	Thrombospondin-4	THBS4	2.070	Up	0.00931
Q15485	Ficolin-2	FCN2	2.111	Up	0.00244
P02743	Serum amyloid P-component	APCS	2.129	Up	0.00429
Q9NZT1	Calmodulin-like protein 5	CALML5	2.131	Up	0.0202
P02750	Leucine-rich alpha-2-glycoprotein	LRG1	2.208	Up	0.00287
P10451	Osteopontin	SPP1	2.249	Up	0.0037
P04040	Catalase	CAT	2.685	Up	0.0293
P04264	"Keratin, type II cytoskeletal 1"	KRT1	2.726	Up	0.0413
Q03591	Complement factor H-related protein 1	CFHR1	3.301	Up	0.0306
