# Supplementary material for: Serum proteomic analysis of differentially expressed proteins and pathways involved in the mechanism of endemic osteoarthritis
Source: Royal Society of Chemistry journal article supplement (doi:10.1039/d2mo00154c), 2022-06-29
Supplement: d2mo00154c5.xlsx [file d2mo00154c5.xlsx]

## Sheet: Regulated Classification
GO Terms Level 1	GO Terms Level 2	Number of proteins	Related proteins
Biological Process	cellular process	207	O00231 O00299 O14979 O14980 O15372 O43707 O60361 O60506 O75531 O76021 O94826 O95816 P00966 P01871 P02545 P02743 P02750 P04040 P04083 P04264 P04843 P05114 P05187 P05387 P05455 P05783 P06733 P06748 P07108 P07355 P07910 P08123 P08133 P08621 P08670 P08758 P09382 P09874 P10412 P10451 P10809 P11142 P11387 P12004 P13010 P13639 P15311 P15559 P15880 P16401 P16402 P16403 P17844 P17980 P18077 P18124 P18621 …
Biological Process	biological regulation	182	O00231 O00299 O14979 O14980 O15372 O43707 O60506 O76021 O95816 P00966 P01871 P02545 P02743 P02750 P04040 P04083 P04264 P05114 P05387 P05783 P06733 P06748 P07355 P07910 P08123 P08133 P08603 P08621 P08670 P08758 P09382 P09874 P10412 P10451 P10809 P11142 P11387 P12004 P13010 P13639 P15311 P15559 P15880 P16401 P16402 P16403 P17844 P17980 P18077 P18124 P18621 P19338 P20618 P21291 P21796 P22626 P23246 …
Biological Process	metabolic process	162	O00231 O14979 O15372 O60361 O60506 O75531 O76021 O94826 O95816 P00966 P01871 P02743 P04040 P04083 P04264 P04843 P05114 P05187 P05387 P05455 P06733 P06748 P07108 P07910 P08123 P08603 P08621 P09874 P10412 P10809 P11142 P11387 P12004 P13010 P13639 P15311 P15559 P15880 P16402 P16403 P17844 P17980 P18077 P18124 P18621 P20042 P20618 P21796 P22626 P23246 P23284 P23396 P23588 P25205 P25398 P26373 P26599 …
Biological Process	single-organism process	154	O00231 O00299 O14980 O43707 O60361 O60506 O75531 O76021 P00966 P01871 P02545 P02750 P04040 P04083 P04264 P04843 P05114 P05783 P06733 P06748 P07108 P07355 P07910 P08123 P08133 P08670 P08758 P09382 P09874 P10451 P10809 P11142 P11387 P12004 P13010 P13639 P15311 P15559 P17844 P17980 P19338 P20042 P20618 P21291 P21796 P22626 P23284 P23396 P23528 P25205 P26599 P27816 P27824 P30040 P30044 P30048 P31040 …
Biological Process	localization	122	O00231 O00299 O14980 O43707 O75531 O94826 P01871 P02545 P02750 P04040 P04083 P04264 P05387 P05455 P05783 P06748 P07108 P07355 P08123 P08133 P08758 P10809 P11142 P13010 P13639 P15311 P15880 P16401 P17980 P18077 P18124 P18621 P20042 P20618 P21796 P22626 P23396 P23528 P25398 P26373 P27816 P27824 P30040 P32969 P35443 P35613 P37802 P38646 P38919 P39019 P39023 P40429 P42704 P42765 P45880 P46776 P46777 …
Biological Process	response to stimulus	112	O00231 O00299 O14980 O43707 O60506 O75531 P00966 P01871 P02545 P02743 P02750 P04040 P04083 P04264 P05114 P05783 P06733 P06748 P07355 P08123 P08133 P08603 P08621 P08670 P08758 P09382 P09874 P10451 P10809 P11142 P11387 P12004 P13010 P13639 P15311 P15559 P17844 P17980 P19338 P20618 P21291 P21796 P22626 P23246 P23396 P23528 P26599 P26641 P30044 P30048 P31327 P31948 P35443 P35613 P35659 P38159 P38570 …
Biological Process	multicellular organismal process	88	O00299 O60506 O76021 P02545 P04040 P04083 P04264 P05114 P05783 P07355 P07910 P08123 P08670 P08758 P09382 P09874 P10451 P10809 P11387 P12004 P13010 P13639 P15311 P17980 P19338 P20042 P21291 P21796 P23284 P23528 P27816 P30044 P30048 P31040 P31327 P35443 P35613 P38159 P38646 P38919 P39019 P49736 P61026 P61604 P61803 P62081 P62258 P62280 P62701 P62753 P62826 P62841 P62910 P63010 P63104 P63244 P63267 …
Biological Process	developmental process	87	O00231 O60506 O76021 P02545 P02750 P04040 P04083 P04264 P05114 P05783 P06748 P07355 P07910 P08123 P08670 P09382 P09874 P10451 P10809 P11387 P12004 P13010 P13639 P15311 P15559 P17980 P19338 P20042 P21796 P23284 P23528 P27816 P27824 P30048 P31040 P31327 P35613 P37802 P38159 P38646 P38919 P39019 P49736 P61026 P61247 P61604 P61803 P62081 P62258 P62280 P62701 P62753 P62826 P62841 P62910 P63010 P63244 …
Biological Process	multi-organism process	85	O14980 O60506 O75531 P01871 P02743 P05387 P05455 P05783 P06733 P06748 P08670 P10451 P10809 P11142 P11387 P13010 P15880 P17980 P18077 P18124 P18621 P20042 P20618 P21796 P23284 P23396 P23528 P25398 P26373 P26599 P26641 P30048 P31327 P32969 P35613 P35659 P39019 P39023 P40429 P46776 P46777 P46778 P46779 P48643 P49207 P49368 P49792 P50914 P50990 P50991 P51149 P52292 P55072 P61247 P62081 P62241 P62244 …
Biological Process	interspecies interaction between organisms	70	O14980 O60506 O75531 P02743 P05387 P05455 P05783 P06733 P06748 P08670 P10809 P11142 P11387 P13010 P15880 P17980 P18077 P18124 P18621 P20618 P21796 P23284 P23396 P23528 P25398 P26373 P26599 P26641 P32969 P35659 P39019 P39023 P40429 P46776 P46777 P46778 P46779 P48643 P49207 P49792 P50914 P51149 P52292 P55072 P61247 P62081 P62241 P62244 P62258 P62280 P62424 P62701 P62750 P62753 P62826 P62829 P62841 …
Biological Process	signaling	51	O00231 O00299 O43707 P01871 P02545 P04083 P05783 P06748 P08123 P08133 P08670 P08758 P09382 P09874 P10809 P11142 P12004 P15311 P15559 P17844 P17980 P20618 P21796 P23528 P26599 P35613 P35659 P38570 P39019 P51149 P51858 P52272 P52597 P55072 P61026 P62258 P62753 P62826 P63010 P63104 P99999 Q07666 Q13442 Q15008 Q15424 Q99873 Q9NZT1 Q9P0L0 Q9UBI6 Q9ULV4 Q9UNM6
Biological Process	single organism signaling	51	O00231 O00299 O43707 P01871 P02545 P04083 P05783 P06748 P08123 P08133 P08670 P08758 P09382 P09874 P10809 P11142 P12004 P15311 P15559 P17844 P17980 P20618 P21796 P23528 P26599 P35613 P35659 P38570 P39019 P51149 P51858 P52272 P52597 P55072 P61026 P62258 P62753 P62826 P63010 P63104 P99999 Q07666 Q13442 Q15008 Q15424 Q99873 Q9NZT1 Q9P0L0 Q9UBI6 Q9ULV4 Q9UNM6
Biological Process	immune system process	44	O00231 O60506 P01871 P02743 P02750 P04040 P04083 P04264 P07355 P08123 P08603 P09382 P09874 P10809 P11142 P13010 P13639 P17980 P20618 P27824 P30048 P35613 P38646 P39019 P40429 P50990 P51149 P55072 P61026 P62753 P62937 P63010 Q01650 Q03591 Q12905 Q12906 Q13442 Q15008 Q15485 Q99584 Q9NZT1 Q9P0L0 Q9UII2 Q9UNM6
Biological Process	other	48	P48643 P61026 P62753 P62937 P50990 P05783 Q15233 P15311 P10451 Q01650 P49368 P62258 P21291 P11387 Q00839 Q08211 P12004 P50991 P39019 P80723 P51149 P17844 P35613 Q14103 P63244 O00299 P07355 P04083 P35443 Q92769 P62826 Q99623 P08123 P20042 Q9UNM6 Q9Y3I0 P21796 P01871 Q9ULV4 Q13185 Q9Y265 P30048 Q9GZV4 P83731 P38570 P38919 Q15424 P23246
Cellular Component	cell	218	O00231 O00299 O14979 O14980 O15372 O43707 O60361 O60506 O75531 O76021 O94826 O95816 P00966 P01871 P02545 P02743 P02750 P04040 P04083 P04264 P04843 P05114 P05187 P05387 P05455 P05783 P06733 P06748 P07108 P07355 P07910 P08123 P08133 P08621 P08670 P08758 P09382 P09874 P10412 P10451 P10809 P11142 P11387 P12004 P13010 P13639 P15311 P15559 P15880 P16401 P16402 P16403 P17844 P17980 P18077 P18124 P18621 …
Cellular Component	intracellular	215	O00231 O00299 O14979 O14980 O15372 O43707 O60361 O60506 O75531 O76021 O94826 O95816 P00966 P02545 P02743 P02750 P04040 P04083 P04264 P04843 P05114 P05387 P05455 P05783 P06733 P06748 P07108 P07355 P07910 P08123 P08133 P08621 P08670 P08758 P09382 P09874 P10412 P10451 P10809 P11142 P11387 P12004 P13010 P13639 P15311 P15559 P15880 P16401 P16402 P16403 P17844 P17980 P18077 P18124 P18621 P19338 P20042 …
Cellular Component	macromolecular complex	146	O00231 O00299 O14979 O14980 O15372 O43707 O60506 O76021 O94826 P01871 P04083 P04843 P05387 P05455 P06733 P06748 P07355 P07910 P08123 P08621 P09874 P10412 P10809 P11142 P11387 P12004 P13010 P13639 P15880 P16401 P16402 P16403 P17844 P17980 P18077 P18124 P18621 P19338 P20042 P20618 P21796 P22626 P23246 P23284 P23396 P23588 P25205 P25398 P26373 P27816 P27824 P31040 P31327 P31948 P32969 P38159 P38570 …
Molecular Function	binding	219	O00231 O00299 O14979 O14980 O15372 O43707 O60361 O60506 O75531 O76021 O94826 O95816 P00966 P01871 P02545 P02743 P02750 P04040 P04083 P04264 P04843 P05114 P05187 P05387 P05455 P05783 P06733 P06748 P07108 P07355 P07910 P08123 P08133 P08603 P08621 P08670 P08758 P09382 P09874 P0DP25 P10412 P10451 P10809 P11142 P11387 P12004 P13010 P13639 P15311 P15559 P15880 P16401 P16402 P16403 P17844 P17980 P18077 …
Molecular Function	catalytic activity	58	O60361 P00966 P04040 P04083 P04843 P05187 P06733 P09874 P10809 P11142 P11387 P12004 P13010 P13639 P15559 P17844 P17980 P20618 P23284 P23396 P23588 P25205 P30044 P30048 P31040 P31327 P38919 P40926 P42704 P42765 P46087 P48047 P49736 P49792 P50990 P51149 P55072 P55084 P55263 P61026 P61803 P62826 P62937 P68366 Q08211 Q12905 Q15008 Q15046 Q15485 Q5VTE0 Q7KZF4 Q92769 Q92841 Q99873 Q9BUQ8 Q9NR30 Q9Y265 …
Molecular Function	structural molecule activity	48	O00231 P02545 P04083 P04264 P05387 P05783 P08123 P08670 P15880 P18077 P18124 P18621 P20700 P23396 P25398 P26373 P27816 P32969 P39019 P39023 P40429 P43243 P46776 P46777 P46778 P46779 P49207 P50914 P61247 P62081 P62241 P62244 P62280 P62424 P62701 P62750 P62753 P62829 P62841 P62910 P63244 P68366 P83731 P83881 Q02878 Q07020 Q9UNM6 Q9UNX3
Molecular Function	transporter activity	16	O00299 O14980 O94826 P08133 P21796 P35613 P45880 P48047 P51991 P52292 P56385 P63010 Q01650 Q13428 Q14847 Q9Y277
Molecular Function	transcription regulatory region DNA binding	13	O43707 P07910 P11387 P13010 P23246 P30044 P38159 P67809 P80723 Q00839 Q15233 Q15424 Q92769
Molecular Function	molecular function regulator	13	O95816 P04083 P06748 P07355 P08758 P12004 P30044 P30048 P55072 P62258 P63244 Q01105 Q9UII2
Molecular Function	other	13	P48643 P15559 P04040 P30044 P50990 P50991 P08133 P30048 P40227 Q9P2E9 P49368 P10809 P04264
