# Supplementary material for: Serum proteomic analysis of differentially expressed proteins and pathways involved in the mechanism of endemic osteoarthritis
Source: Royal Society of Chemistry journal article supplement (doi:10.1039/d2mo00154c), 2022-06-29
Supplement: d2mo00154c6.xlsx [file d2mo00154c6.xlsx]

## Sheet: all
GO Terms Level 1	GO Terms Description	GO Terms Level	GO Terms ID	Mapping	Background	All Mapping	All Background	Fold Enrichment	Fisher's exact test p value	-log10(p value)	Related proteins
Cellular Component	intracellular non-membrane-bounded organelle	5	GO:0043232	131	382	222	1281	1.98	1.18383e-23	22.93	O14980 O43707 O75531 O76021 P02545 P04264 P05114 P05387 P05455 P05783 P06733 P06748 P07355 P07910 P08670 P09874 P10412 P11142 P11387 P12004 P13010 P13639 P15311 P15880 P16401 P16402 P16403 P17844 P17980 P18077 P18124 P18621 P19338 P20700 P21796 P22626 P23246 P23396 P23528 P25205 P25398 P26373 P26599 P27816 P27824 P31040 P31327 P32969 P35659 P38159 P38646 P39019 P39023 P40227 P40429 P42704 P45880 …
	non-membrane-bounded organelle	4	GO:0043228	131	382	222	1281	1.98	1.18383e-23	22.93	O14980 O43707 O75531 O76021 P02545 P04264 P05114 P05387 P05455 P05783 P06733 P06748 P07355 P07910 P08670 P09874 P10412 P11142 P11387 P12004 P13010 P13639 P15311 P15880 P16401 P16402 P16403 P17844 P17980 P18077 P18124 P18621 P19338 P20700 P21796 P22626 P23246 P23396 P23528 P25205 P25398 P26373 P26599 P27816 P27824 P31040 P31327 P32969 P35659 P38159 P38646 P39019 P39023 P40227 P40429 P42704 P45880 …
	nucleus	6	GO:0005634	155	519	222	1281	1.72	2.71323e-22	21.57	O00231 O00299 O14979 O14980 O43707 O60361 O60506 O75531 O76021 P02545 P02743 P04083 P04264 P05114 P05455 P05783 P06733 P06748 P07355 P07910 P08621 P09382 P09874 P10412 P11142 P11387 P12004 P13010 P13639 P15311 P15880 P16401 P16402 P16403 P17844 P17980 P18124 P18621 P19338 P20618 P20700 P21291 P21796 P22626 P23246 P23284 P23396 P23528 P25205 P25398 P26373 P26599 P26641 P30044 P31040 P31327 P31948 …
	nuclear lumen	7	GO:0031981	117	343	222	1281	1.97	7.46073e-20	19.13	O00231 O14979 O14980 O43707 O60506 O75531 O76021 P02545 P04083 P05114 P05455 P05783 P06748 P07910 P08621 P09874 P10412 P11142 P11387 P12004 P13010 P15311 P15880 P16401 P16402 P16403 P17844 P17980 P18124 P19338 P20618 P20700 P22626 P23246 P23396 P23528 P25205 P25398 P26599 P31040 P31327 P35659 P38159 P38646 P38919 P39019 P39023 P40429 P42704 P43243 P46087 P46777 P48643 P49736 P50990 P50991 P51858 …
	ribonucleoprotein complex	3	GO:1990904	76	180	222	1281	2.44	6.14541e-18	17.21	O14979 O14980 O43707 O60506 O76021 P05387 P05455 P06748 P07910 P08621 P11142 P11387 P13639 P15880 P17844 P17980 P18077 P18124 P18621 P19338 P22626 P23396 P23588 P25398 P26373 P27824 P32969 P38159 P38919 P39019 P39023 P40429 P42704 P46776 P46777 P46778 P46779 P49207 P49458 P50914 P51991 P52272 P52597 P61247 P62081 P62241 P62244 P62280 P62316 P62424 P62701 P62750 P62753 P62829 P62841 P62910 P63244 …
	macromolecular complex	2	GO:0032991	146	548	222	1281	1.54	3.8333e-14	13.42	O00231 O00299 O14979 O14980 O15372 O43707 O60506 O76021 O94826 P01871 P04083 P04843 P05387 P05455 P06733 P06748 P07355 P07910 P08123 P08621 P09874 P10412 P10809 P11142 P11387 P12004 P13010 P13639 P15880 P16401 P16402 P16403 P17844 P17980 P18077 P18124 P18621 P19338 P20042 P20618 P21796 P22626 P23246 P23284 P23396 P23588 P25205 P25398 P26373 P27816 P27824 P31040 P31327 P31948 P32969 P38159 P38570 …
	ribosome	6	GO:0005840	39	71	222	1281	3.17	1.11114e-13	12.95	P05387 P13639 P15880 P18077 P18124 P18621 P23396 P25398 P26373 P27824 P32969 P39019 P39023 P40429 P46776 P46777 P46778 P46779 P49207 P50914 P61247 P62081 P62241 P62244 P62280 P62424 P62701 P62750 P62753 P62829 P62841 P62910 P63244 P83731 P83881 Q02878 Q07020 Q9P2E9 Q9UNX3
	ribosomal subunit	7	GO:0044391	36	64	222	1281	3.25	4.25685e-13	12.37	P05387 P15880 P18077 P18124 P18621 P23396 P25398 P26373 P32969 P39019 P39023 P40429 P46776 P46777 P46778 P46779 P49207 P50914 P61247 P62081 P62241 P62244 P62280 P62424 P62701 P62750 P62753 P62829 P62841 P62910 P63244 P83731 P83881 Q02878 Q07020 Q9UNX3
Molecular Function	nucleic acid binding	4	GO:0003676	154	410	222	1275	2.16	1.96751e-36	35.71	O14979 O14980 O15372 O43707 O60506 O75531 O76021 P00966 P04083 P04843 P05114 P05455 P05783 P06733 P06748 P07355 P07910 P08621 P08670 P09382 P09874 P10412 P10809 P11142 P11387 P12004 P13010 P13639 P15311 P15559 P15880 P16401 P16402 P16403 P17844 P18077 P18124 P18621 P19338 P20042 P21291 P22626 P23246 P23284 P23396 P23588 P25205 P25398 P26373 P26599 P26641 P27816 P27824 P30044 P31948 P32969 P35659 …
	RNA binding	5	GO:0003723	144	364	222	1275	2.27	4.74498e-36	35.32	O14979 O14980 O15372 O43707 O60506 O76021 P00966 P04083 P04843 P05455 P05783 P06733 P06748 P07355 P07910 P08621 P08670 P09382 P09874 P10412 P10809 P11142 P11387 P13010 P13639 P15311 P15559 P15880 P16401 P16402 P16403 P17844 P18077 P18124 P18621 P19338 P20042 P21291 P22626 P23246 P23284 P23396 P23588 P25398 P26373 P26599 P26641 P27816 P27824 P31948 P32969 P35659 P38159 P38646 P38919 P39019 P39023 …
	heterocyclic compound binding	3	GO:1901363	171	548	222	1275	1.79	1.20635e-29	28.92	O14979 O14980 O15372 O43707 O60361 O60506 O75531 O76021 O95816 P00966 P04040 P04083 P04843 P05114 P05455 P05783 P06733 P06748 P07355 P07910 P08133 P08621 P08670 P09382 P09874 P10412 P10809 P11142 P11387 P12004 P13010 P13639 P15311 P15559 P15880 P16401 P16402 P16403 P17844 P17980 P18077 P18124 P18621 P19338 P20042 P21291 P22626 P23246 P23284 P23396 P23588 P25205 P25398 P26373 P26599 P26641 P27816 …
	organic cyclic compound binding	3	GO:0097159	171	563	222	1275	1.74	8.73277e-28	27.06	O14979 O14980 O15372 O43707 O60361 O60506 O75531 O76021 O95816 P00966 P04040 P04083 P04843 P05114 P05455 P05783 P06733 P06748 P07355 P07910 P08133 P08621 P08670 P09382 P09874 P10412 P10809 P11142 P11387 P12004 P13010 P13639 P15311 P15559 P15880 P16401 P16402 P16403 P17844 P17980 P18077 P18124 P18621 P19338 P20042 P21291 P22626 P23246 P23284 P23396 P23588 P25205 P25398 P26373 P26599 P26641 P27816 …
	structural constituent of ribosome	3	GO:0003735	35	62	222	1275	3.24	9.44703e-13	12.02	P05387 P15880 P18077 P18124 P18621 P23396 P25398 P26373 P32969 P39019 P39023 P40429 P46776 P46777 P46778 P46779 P49207 P50914 P61247 P62081 P62241 P62244 P62280 P62424 P62701 P62750 P62753 P62829 P62841 P62910 P83731 P83881 Q02878 Q07020 Q9UNX3
	DNA binding	5	GO:0003677	50	114	222	1275	2.52	2.91875e-12	11.53	O14979 O43707 O75531 P04083 P05114 P06733 P07910 P09874 P10412 P10809 P11387 P12004 P13010 P16401 P16402 P16403 P18124 P19338 P22626 P23246 P23396 P25205 P30044 P35659 P38159 P42704 P49736 P51858 P62805 P62841 P67809 P80723 Q00839 Q01105 Q02878 Q04837 Q07666 Q08211 Q12905 Q12906 Q14103 Q15233 Q15424 Q71DI3 Q71UI9 Q92522 Q92769 Q92945 Q96AE4 Q99873
	structural molecule activity	2	GO:0005198	48	130	222	1275	2.12	1.46199e-08	7.84	O00231 P02545 P04083 P04264 P05387 P05783 P08123 P08670 P15880 P18077 P18124 P18621 P20700 P23396 P25398 P26373 P27816 P32969 P39019 P39023 P40429 P43243 P46776 P46777 P46778 P46779 P49207 P50914 P61247 P62081 P62241 P62244 P62280 P62424 P62701 P62750 P62753 P62829 P62841 P62910 P63244 P68366 P83731 P83881 Q02878 Q07020 Q9UNM6 Q9UNX3
	chromatin binding	3	GO:0003682	20	37	222	1275	3.1	2.94163e-07	6.53	O43707 P05114 P07910 P10412 P11387 P12004 P16401 P16402 P16403 P23246 P35659 P38159 P62826 P67809 Q04837 Q14103 Q15233 Q15424 Q71DI3 Q92769
Biological Process	nucleic acid metabolic process	6	GO:0090304	105	281	218	1258	2.16	4.74176e-21	20.32	O14979 O60506 O75531 O76021 P04083 P05114 P05387 P05455 P06733 P06748 P07910 P08621 P09874 P10809 P11142 P11387 P12004 P13010 P15880 P17844 P18077 P18124 P18621 P22626 P23246 P23396 P23588 P25205 P25398 P26373 P26599 P32969 P35659 P38159 P38919 P39019 P39023 P40429 P42704 P46087 P46776 P46777 P46778 P46779 P49207 P49736 P49792 P50914 P51858 P51991 P52272 P52292 P52597 P55072 P55209 P61247 P62081 …
	negative regulation of gene expression	7	GO:0010629	76	180	218	1258	2.44	5.24248e-18	17.28	O14980 O60506 P05387 P06733 P09874 P10412 P11142 P13010 P15311 P15880 P16401 P16402 P16403 P17844 P18077 P18124 P18621 P22626 P23246 P23396 P23588 P25398 P26373 P26599 P30040 P30044 P32969 P38159 P38919 P39019 P39023 P40429 P46776 P46777 P46778 P46779 P49207 P49458 P49792 P50914 P51858 P61247 P62081 P62241 P62244 P62280 P62424 P62701 P62750 P62753 P62805 P62826 P62829 P62841 P62910 P63244 P67809 …
	regulation of gene expression	6	GO:0010468	118	368	218	1258	1.85	1.99496e-17	16.7	O00231 O14979 O14980 O15372 O60506 P02545 P04040 P05114 P05387 P06733 P06748 P07910 P08603 P08621 P08670 P09874 P10412 P10809 P11142 P11387 P12004 P13010 P13639 P15311 P15880 P16401 P16402 P16403 P17844 P17980 P18077 P18124 P18621 P19338 P20618 P22626 P23246 P23396 P23588 P25398 P26373 P26599 P30040 P30044 P30048 P32969 P35659 P38159 P38919 P39019 P39023 P40429 P42704 P43243 P46087 P46776 P46777 …
	RNA metabolic process	7	GO:0016070	89	236	218	1258	2.18	2.39511e-17	16.62	O14979 O60506 O76021 P05387 P05455 P06733 P07910 P08621 P09874 P11142 P13010 P15880 P17844 P18077 P18124 P18621 P22626 P23246 P23396 P23588 P25398 P26373 P26599 P32969 P35659 P38159 P38919 P39019 P39023 P40429 P42704 P46087 P46776 P46777 P46778 P46779 P49207 P49792 P50914 P51858 P51991 P52272 P52597 P61247 P62081 P62241 P62244 P62280 P62316 P62424 P62701 P62750 P62753 P62805 P62829 P62841 P62910 …
	cellular macromolecule biosynthetic process	6	GO:0034645	91	269	218	1258	1.95	3.83833e-14	13.42	O14979 O15372 P04843 P05387 P05455 P06733 P09874 P11142 P11387 P12004 P13010 P13639 P15880 P17844 P18077 P18124 P18621 P20042 P23246 P23396 P23588 P25205 P25398 P26373 P26599 P26641 P32969 P35659 P38159 P38919 P39019 P39023 P40429 P42704 P46776 P46777 P46778 P46779 P49207 P49736 P50914 P51858 P55072 P55209 P61247 P61803 P62081 P62241 P62244 P62280 P62424 P62701 P62750 P62753 P62805 P62829 P62841 …
	ribosome biogenesis	6	GO:0042254	42	80	218	1258	3.03	8.52291e-14	13.07	O14980 O76021 P05387 P06748 P15880 P18077 P18124 P18621 P23396 P25398 P26373 P32969 P38919 P39019 P39023 P40429 P46087 P46776 P46777 P46778 P46779 P49207 P50914 P61247 P62081 P62241 P62244 P62280 P62424 P62701 P62750 P62753 P62826 P62829 P62841 P62910 P83731 P83881 Q02878 Q07020 Q14978 Q9NR30
	viral transcription	6	GO:0019083	35	63	218	1258	3.21	1.51343e-12	11.82	P05387 P15880 P18077 P18124 P18621 P23396 P25398 P26373 P32969 P39019 P39023 P40429 P46776 P46777 P46778 P46779 P49207 P49792 P50914 P61247 P62081 P62241 P62244 P62280 P62424 P62701 P62750 P62753 P62829 P62841 P62910 P83731 P83881 Q02878 Q07020
	amide biosynthetic process	6	GO:0043604	49	111	218	1258	2.55	2.95801e-12	11.53	O15372 P00966 P05387 P05455 P13639 P15880 P18077 P18124 P18621 P20042 P23396 P23588 P25398 P26373 P26599 P26641 P31327 P32969 P39019 P39023 P40429 P46776 P46777 P46778 P46779 P49207 P50914 P61247 P62081 P62241 P62244 P62280 P62424 P62701 P62750 P62753 P62829 P62841 P62910 P63244 P83731 P83881 Q02878 Q07020 Q15046 Q5VTE0 Q9GZV4 Q9P2E9 Q9UNX3
	nucleobase-containing compound catabolic process	6	GO:0034655	42	87	218	1258	2.79	3.65079e-12	11.44	P04040 P05387 P15880 P17844 P18077 P18124 P18621 P23396 P23588 P25398 P26373 P32969 P38919 P39019 P39023 P40429 P46776 P46777 P46778 P46779 P49207 P50914 P55072 P61247 P62081 P62241 P62244 P62280 P62424 P62701 P62750 P62753 P62829 P62841 P62910 P83731 P83881 Q02878 Q07020 Q14103 Q7KZF4 Q92945
	peptide biosynthetic process	7	GO:0043043	47	105	218	1258	2.58	4.9076e-12	11.31	O15372 P05387 P05455 P13639 P15880 P18077 P18124 P18621 P20042 P23396 P23588 P25398 P26373 P26599 P26641 P32969 P39019 P39023 P40429 P46776 P46777 P46778 P46779 P49207 P50914 P61247 P62081 P62241 P62244 P62280 P62424 P62701 P62750 P62753 P62829 P62841 P62910 P63244 P83731 P83881 Q02878 Q07020 Q15046 Q5VTE0 Q9GZV4 Q9P2E9 Q9UNX3
	protein localization to endoplasmic reticulum	7	GO:0070972	37	73	218	1258	2.92	1.35517e-11	10.87	P05387 P15880 P18077 P18124 P18621 P23396 P25398 P26373 P32969 P39019 P39023 P40429 P46776 P46777 P46778 P46779 P49207 P49458 P50914 P61026 P61247 P62081 P62241 P62244 P62280 P62424 P62701 P62750 P62753 P62829 P62841 P62910 P83731 P83881 Q02878 Q07020 Q9P0L0
	protein localization to organelle	6	GO:0033365	52	127	218	1258	2.36	2.79051e-11	10.55	O14980 O94826 P02545 P05387 P05455 P10809 P11142 P15880 P16401 P18077 P18124 P18621 P23396 P23528 P25398 P26373 P32969 P39019 P39023 P40429 P46776 P46777 P46778 P46779 P49207 P49458 P49792 P50914 P51149 P52292 P61026 P61247 P62081 P62241 P62244 P62280 P62424 P62701 P62750 P62753 P62826 P62829 P62841 P62910 P67809 P83731 P83881 Q02878 Q07020 Q08211 Q99623 Q9P0L0
	protein localization to membrane	6	GO:0072657	41	96	218	1258	2.46	9.24846e-10	9.03	P05387 P05783 P07355 P15311 P15880 P18077 P18124 P18621 P23396 P25398 P26373 P32969 P35613 P39019 P39023 P40429 P46776 P46777 P46778 P46779 P49207 P49458 P50914 P60903 P61026 P61247 P62081 P62241 P62244 P62280 P62424 P62701 P62750 P62753 P62829 P62841 P62910 P83731 P83881 Q02878 Q07020
	chromatin organization	7	GO:0006325	23	39	218	1258	3.4	3.08832e-09	8.51	P05114 P06748 P07910 P10412 P11387 P16401 P16402 P16403 P23246 P35659 P49736 P55209 P62805 Q01105 Q13185 Q15424 Q71DI3 Q71UI9 Q92522 Q92688 Q92769 Q99873 Q9Y265
