# Supplementary material for: Serum proteomic analysis of differentially expressed proteins and pathways involved in the mechanism of endemic osteoarthritis
Source: Royal Society of Chemistry journal article supplement (doi:10.1039/d2mo00154c), 2022-06-29
Supplement: d2mo00154c7.xlsx [file d2mo00154c7.xlsx]

## Sheet: all
Domain description	Mapping	Background	All Mapping	All Background	Fold Enrichment	Fisher's exact test p value	-log10(p value)	Related proteins
Nucleotide-binding alpha-beta plait domain	22	50	186	1143	2.7	1.90905e-06	5.72	O14979 O60506 P05455 P07910 P08621 P19338 P22626 P23246 P23588 P26599 P38159 P43243 P51991 P52272 P52597 P62750 Q07955 Q14103 Q15233 Q15424 Q16629 Q99729
RNA recognition motif domain	22	50	186	1143	2.7	1.90905e-06	5.72	O14979 O60506 P05455 P07910 P08621 P19338 P22626 P23246 P23588 P26599 P38159 P43243 P51991 P52272 P52597 Q07955 Q14103 Q15233 Q15424 Q16629 Q99729 Q9NR30
Winged helix-turn-helix DNA-binding domain	10	16	186	1143	3.84	3.40718e-05	4.47	O00231 P05455 P10412 P16401 P16402 P16403 P39019 Q15008 Q92522 Q9UNM6
Linker histone H1/H5, domain H15	5	5	186	1143	6.15	0.000109043	3.96	P10412 P16401 P16402 P16403 Q92522
GroEL-like apical domain	6	9	186	1143	4.1	0.000941753	3.03	P10809 P40227 P48643 P49368 P50990 P50991
GroEL-like equatorial domain	6	9	186	1143	4.1	0.000941753	3.03	P10809 P40227 P48643 P49368 P50990 P50991
Translation protein SH3-like domain	5	7	186	1143	4.39	0.00172407	2.76	P46778 P50914 Q02878 Q9GZV4 Q9UNX3
Nucleic acid-binding, OB-fold	7	14	186	1143	3.07	0.00335714	2.47	P25205 P49736 P62280 P67809 Q04837 Q15046 Q9GZV4
TCP-1-like chaperonin intermediate domain	5	8	186	1143	3.84	0.00399268	2.4	P40227 P48643 P49368 P50990 P50991
Double-stranded RNA-binding domain	3	3	186	1143	6.15	0.00425113	2.37	P15880 Q08211 Q12906
Cyclophilin-type peptidyl-prolyl cis-trans isomerase domain	3	3	186	1143	6.15	0.00425113	2.37	P23284 P49792 P62937
Cyclophilin-like domain	3	3	186	1143	6.15	0.00425113	2.37	P23284 P49792 P62937
Ribosomal protein L2 domain 2	4	6	186	1143	4.1	0.00779268	2.11	P50914 Q02878 Q9GZV4 Q9UNX3
Porin domain	3	4	186	1143	4.61	0.0149573	1.83	P21796 P45880 Q9Y277
Helicase, C-terminal	6	15	186	1143	2.46	0.0237327	1.62	P17844 P38919 Q08211 Q92841 Q9BUQ8 Q9NR30
DEAD/DEAH box helicase domain	6	15	186	1143	2.46	0.0237327	1.62	P17844 P38919 Q08211 Q92841 Q9BUQ8 Q9NR30
Helicase superfamily 1/2, ATP-binding domain	6	15	186	1143	2.46	0.0237327	1.62	P17844 P38919 Q08211 Q92841 Q9BUQ8 Q9NR30
Ribosomal protein L18e/L15P	2	2	186	1143	6.15	0.0263616	1.58	P46776 Q07020
CARG-binding factor, N-terminal	2	2	186	1143	6.15	0.0263616	1.58	Q14103 Q99729
Lamin Tail Domain	2	2	186	1143	6.15	0.0263616	1.58	P02545 P20700
JAB1/MPN/MOV34 metalloenzyme domain	2	2	186	1143	6.15	0.0263616	1.58	O15372 Q6P2Q9
Domain of unknown function DUF1897	2	2	186	1143	6.15	0.0263616	1.58	Q92945 Q96AE4
DZF domain	2	2	186	1143	6.15	0.0263616	1.58	Q12905 Q12906
NOPS	2	2	186	1143	6.15	0.0263616	1.58	P23246 Q15233
LIS1 homology motif	2	2	186	1143	6.15	0.0263616	1.58	Q13428 Q14978
RNA helicase, DEAD-box type, Q motif	5	12	186	1143	2.56	0.0323195	1.49	P17844 P38919 Q92841 Q9BUQ8 Q9NR30
Translation protein, beta-barrel domain	4	9	186	1143	2.73	0.043751	1.36	P13639 P18077 P39023 Q5VTE0
