# Supplementary material for: Serum proteomic analysis of differentially expressed proteins and pathways involved in the mechanism of endemic osteoarthritis
Source: Royal Society of Chemistry journal article supplement (doi:10.1039/d2mo00154c), 2022-06-29
Supplement: d2mo00154c8.xlsx [file d2mo00154c8.xlsx]

## Sheet: Up-regulated DEPs
KEGG pathway	Mapping	Background	All Mapping	All Background	Fold Enrichment	Fisher's exact test p value	-log10(p value)	Related proteins
hsa04512 ECM-receptor interaction - Homo sapiens (human)	3	29	6	782	13.48	0.000853084	3.07	P08123 P10451 P35443
hsa05165 Human papillomavirus infection - Homo sapiens (human)	3	37	6	782	10.57	0.0017715	2.75	P08123 P10451 P35443
hsa04510 Focal adhesion - Homo sapiens (human)	3	44	6	782	8.89	0.00295712	2.53	P08123 P10451 P35443
hsa04371 Apelin signaling pathway - Homo sapiens (human)	2	14	6	782	18.62	0.00428948	2.37	P10451 Q9NZT1
hsa04151 PI3K-Akt signaling pathway - Homo sapiens (human)	3	52	6	782	7.52	0.00481735	2.32	P08123 P10451 P35443
