# Supplementary material for: Serum proteomic analysis of differentially expressed proteins and pathways involved in the mechanism of endemic osteoarthritis
Source: Royal Society of Chemistry journal article supplement (doi:10.1039/d2mo00154c), 2022-06-29
Supplement: d2mo00154c9.xlsx [file d2mo00154c9.xlsx]

## Sheet: Down-regulated DEPs
KEGG pathway	Mapping	Background	All Mapping	All Background	Fold Enrichment	Fisher's exact test p value	-log10(p value)	Related proteins
hsa03010 Ribosome - Homo sapiens (human)	35	63	133	782	3.27	2.41003e-13	12.62	P05387 P15880 P18077 P18124 P18621 P23396 P25398 P26373 P32969 P39019 P39023 P40429 P46776 P46777 P46778 P46779 P49207 P50914 P61247 P62081 P62241 P62244 P62280 P62424 P62701 P62750 P62753 P62829 P62841 P62910 P83731 P83881 Q02878 Q07020 Q9UNX3
hsa03040 Spliceosome - Homo sapiens (human)	14	41	133	782	2.01	0.00517173	2.29	P07910 P08621 P11142 P17844 P38159 P38919 P51991 P52272 P62316 Q00839 Q07955 Q16629 Q6P2Q9 Q9BUQ8
hsa05169 Epstein-Barr virus infection - Homo sapiens (human)	12	32	133	782	2.2	0.00600223	2.22	O00231 O14980 P08670 P11142 P17980 P62258 P62826 P63104 Q15008 Q7KZF4 Q92769 Q9UNM6
hsa05134 Legionellosis - Homo sapiens (human)	6	15	133	782	2.35	0.0286927	1.54	P10809 P11142 P26641 P55072 P99999 Q5VTE0
hsa03430 Mismatch repair - Homo sapiens (human)	2	2	133	782	5.88	0.0287454	1.54	P12004 Q04837
hsa03030 DNA replication - Homo sapiens (human)	4	8	133	782	2.94	0.0320788	1.49	P12004 P25205 P49736 Q04837
hsa03018 RNA degradation - Homo sapiens (human)	3	5	133	782	3.53	0.0369941	1.43	P06733 P10809 P38646
hsa05034 Alcoholism - Homo sapiens (human)	6	16	133	782	2.2	0.0396313	1.4	P0DP25 P62805 Q71DI3 Q71UI9 Q92769 Q9UBI6
hsa05016 Huntington's disease - Homo sapiens (human)	8	24	133	782	1.96	0.0476282	1.32	P21796 P31040 P45880 P48047 P63010 P99999 Q92769 Q9Y277
